# Supplementary material for: The habit, choice, intention, and perception of raw beef consumers on raw beef-eating: the health risk management perspective
Source: Research Square preprint supplement (doi:10.21203/rs.3.rs-1304039/v1), 2022-08-01
Supplement: Supplementary file 1 [file 0f3a1594adeb330ad8f457ee.xlsx]

## Sheet: Main Data
City	Age	Sex	Marital Status	Health Status	Weight status	Educational Status	Meal Daily	Meal Regularity	How Start RB	Add Spice	Spice Type	What Do After Eat RB	Reason to V	Favorite Preparation	Raw Beef Type	Reason Eating RB	feeling	How Often Eating RB	Which Meal Eat RB	Depenency Level	Intent to stop RB	Beliefe RB Safety	K.RB Health Risk	Intent to Improve RBE.K	Improve RBE.K Health Risk	How Easy to stop RBE	What Prevents to stop RBE	cumulative intension	RBE Expose Diseases	RBE Disease Fatal	RBE Benefit > Risk	Spice and Alchol Kill Germs	Cooking Avoid Germs	RB contaminate by Germs	RB Transmit Disease	Cummulative Perception
Dessie	18-35	male	single	good	normal weight	higher education	3 meal	yes, sometimes	I don't re	yes, som	mixture	tea & coff	my habit	heated	beef	keeps me	nothing	once a day	launch	Not Dependent	no	unsafe	insufficient	highly interested	may be	easy	no alternative	good intension	agree	disagree	agree	disagree	strong agree	neutral	disagree	Bad Perception
Dessie	36-50	male	single	excellent	obese	secondary school	3 meal	no	peer pres	yes, most	mixture	alcohol	incr meta	raw beef	beef	cheers me	uncomfor	1-3t month	launch	Dependent	no	safe	sufficient	not interested	never	not easy	addicted	bad intension	disagree	disagree	disagree	agree	agree	neutral	disagree	Bad Perception
Dessie	>50	male	single	good	normal weight	higher education	3 meal	yes, always	habit fr an	yes, most	mixture	alcohol	incr meta	heated	beef	my traditi	nothing	only holy	launch	Not Dependent	yes, my personal decision	safe	sufficient	moderate interested	immediately stop	easy	good to health	good intension	agree	agree	disagree	disagree	agree	neutral	disagree	Bad Perception
Dessie	36-50	female	single	good	normal weight	higher education	2 meal	yes, sometimes	I don't re	yes, most	pepper	tea & coff	my habit	heated	mutton	keeps me	nothing	once a week	breakfast	Not Dependent	yes, my personal decision	unsafe	sufficient	not interested	may be	unsure	no alternative	good intension	agree	agree	agree	disagree	agree	agree	agree	Bad Perception
Dessie	18-35	male	single	very good	normal weight	secondary school	3 meal	no	intentional	yes, som	chili pep	alcohol	incr meta	heated	beef	cheers me	nothing	once a day	launch	Not Dependent	no	safe	sufficient	not interested	never	impossible	addicted	bad intension	agree	disagree	agree	disagree	agree	neutral	disagree	Bad Perception
Dessie	18-35	male	single	good	normal weight	secondary school	3 meal	yes, sometimes	I don't re	yes, som	pepper	tea & coff	good feel	heated	beef	cheers me	nothing	once a day	launch	Not Dependent	no	safe	insufficient	moderate interested	may be	easy	good to health	good intension	agree	disagree	neutral	neutral	agree	neutral	neutral	Bad Perception
Dessie	18-35	male	single	good	normal weight	primary school	3 meal	yes, always	intentional	yes, most	chili pep	other	my habit	heated	beef	keeps me	nothing	once a week	all meals	Not Dependent	no	neutral	sufficient	in dilemma	need time	unsure	no alternative	bad intension	agree	disagree	neutral	disagree	agree	disagree	disagree	Bad Perception
Dessie	36-50	female	single	good	normal weight	higher education	3 meal	yes, always	habit fr an	yes, som	chili pep	other	my habit	heated	beef	my traditi	nothing	few time we	launch	Not Dependent	yes, my personal decision	neutral	good	in dilemma	immediately stop	easy	good to health	good intension	agree	disagree	neutral	disagree	agree	neutral	disagree	Bad Perception
Dessie	18-35	male	single	good	normal weight	higher education	3 meal	yes, always	intentional	yes, most	mixture	tea & coff	good feel	raw beef	beef	high nutr	nothing	once a week	launch	Dependent	no	I don't know	sufficient	in dilemma	need time	unsure	no alternative	bad intension	agree	agree	neutral	disagree	agree	neutral	disagree	Bad Perception
Dessie	18-35	male	single	very good	normal weight	secondary school	3 meal	yes, always	peer pres	yes, som	chili pep	other	my habit	heated	beef	cheers me	nothing	once a day	launch	Not Dependent	no	neutral	sufficient	not interested	may be	easy	good to health	good intension	agree	disagree	neutral	disagree	agree	neutral	disagree	Bad Perception
Dessie	18-35	male	single	good	normal weight	secondary school	3 meal	no	habit fr an	yes, som	chili pep	other	incr meta	heated	beef	cheers me	nothing	only holy	dinner	Not Dependent	no	safe	sufficient	moderate interested	immediately stop	easy	good to health	good intension	agree	neutral	agree	disagree	agree	disagree	disagree	Bad Perception
Dessie	18-35	female	single	good	normal weight	higher education	3 meal	yes, sometimes	habit fr an	yes, som	chili pep	other	good feel	heated	beef	my traditi	nothing	only holy	launch	Not Dependent	yes, my personal decision	I don't know	sufficient	moderate interested	immediately stop	easy	good to health	good intension	agree	neutral	neutral	neutral	agree	neutral	neutral	Good Perception
Dessie	36-50	male	married	very good	normal weight	higher education	2 meal	no	peer pres	yes, most	mixture	alcohol	incr meta	raw beef	beef	high nutr	hunger	1-3t month	launch	Dependent	no	unsafe	insufficient	not interested	never	not easy	addicted	good intension	disagree	disagree	neutral	agree	agree	disagree	disagree	Bad Perception
Dessie	18-35	male	single	poor	under weight	secondary school	3 meal	yes, sometimes	intentional	yes, most	chili pep	other	good feel	heated	beef	cheers me	hunger	few time day	launch	Not Dependent	yes, my personal decision	I don't know	sufficient	not interested	never	not easy	addicted	good intension	agree	disagree	disagree	disagree	agree	neutral	disagree	Bad Perception
Dessie	18-35	male	married	very good	normal weight	higher education	2 meal	no	peer pres	yes, most	mixture	other	good feel	heated	beef	high nutr	nothing	few time we	launch	Not Dependent	no	neutral	good	in dilemma	need time	unsure	I didn't believe	bad intension	agree	disagree	neutral	disagree	agree	neutral	disagree	Bad Perception
Dessie	18-35	female	single	good	normal weight	higher education	3 meal	yes, always	I don't re	yes, som	chili pep	tea & coff	my habit	heated	beef	keeps me	nothing	once a week	launch	Not Dependent	yes, my personal decision	unsafe	sufficient	moderate interested	may be	easy	no alternative	good intension	agree	disagree	disagree	disagree	agree	neutral	disagree	Bad Perception
Dessie	18-35	male	married	excellent	normal weight	higher education	4 meal	yes, always	habit fr an	yes, som	mixture	tea & coff	incr meta	heated	beef	cheers me	nothing	1-3t month	launch	Not Dependent	no	safe	insufficient	highly interested	may be	easy	I didn't believe	good intension	agree	disagree	disagree	agree	agree	agree	agree	Bad Perception
Dessie	18-35	male	single	very good	normal weight	higher education	2 meal	no	intentional	yes, som	pepper	other	my habit	heated	beef	cheers me	uncomfor	few time we	all meals	Not Dependent	no	neutral	good	not interested	may be	unsure	no alternative	bad intension	agree	neutral	neutral	agree	agree	neutral	disagree	Bad Perception
Dessie	36-50	female	married	good	normal weight	secondary school	3 meal	yes, sometimes	I don't re	yes, som	pepper	other	incr meta	heated	beef	high nutr	nothing	once a day	launch	Not Dependent	yes, my personal decision	neutral	good	in dilemma	need time	unsure	I didn't believe	good intension	agree	neutral	disagree	neutral	agree	neutral	agree	Good Perception
Dessie	>50	male	married	good	normal weight	higher education	3 meal	yes, always	habit fr an	yes, most	mixture	alcohol	incr meta	heated	beef	my traditi	nothing	once a week	launch	Not Dependent	yes, my personal decision	safe	sufficient	moderate interested	immediately stop	easy	good to health	good intension	agree	agree	disagree	disagree	agree	neutral	agree	Good Perception
Dessie	18-35	male	single	very good	normal weight	higher education	3 meal	no	peer pres	yes, most	mixture	alcohol	incr meta	raw beef	mutton	cheers me	uncomfor	1-3t month	breakfast	Dependent	no	safe	insufficient	not interested	never	impossible	addicted	bad intension	agree	disagree	disagree	strong agree	agree	disagree	disagree	Bad Perception
Dessie	36-50	male	single	good	normal weight	higher education	4 meal	yes, always	peer pres	yes, most	chili pep	other	good feel	heated	beef	my traditi	nothing	only holy	launch	Not Dependent	no	safe	sufficient	in dilemma	immediately stop	easy	good to health	good intension	agree	disagree	disagree	disagree	agree	neutral	agree	Bad Perception
Dessie	36-50	male	married	very good	normal weight	higher education	3 meal	yes, sometimes	habit fr an	yes, som	chili pep	alcohol	incr meta	raw beef	beef	cheers me	uncomfor	1-3t month	launch	Dependent	no	neutral	sufficient	not interested	may be	not easy	addicted	bad intension	agree	strong agree	strong agree	agree	neutral	disagree	strong agree	Bad Perception
Dessie	18-35	male	single	good	normal weight	primary school	3 meal	yes, sometimes	peer pres	yes, most	chili pep	alcohol	good feel	raw beef	beef	keeps me	nothing	once a week	launch	Not Dependent	no	unsafe	insufficient	highly interested	may be	unsure	no alternative	good intension	strong agree	disagree	disagree	disagree	strong agree	agree	strong agree	Bad Perception
Dessie	18-35	male	single	excellent	normal weight	higher education	3 meal	yes, sometimes	I don't re	yes, som	mixture	tea & coff	good feel	heated	beef	my traditi	nothing	few time we	launch	Not Dependent	no	safe	insufficient	highly interested	may be	easy	no alternative	good intension	disagree	agree	agree	strong disagree	strong agree	agree	strong agree	Bad Perception
Dessie	18-35	male	single	very good	normal weight	higher education	3 meal	yes, sometimes	I don't re	yes, som	mixture	tea & coff	my habit	raw beef	beef	cheers me	uncomfor	1-3t month	launch	Dependent	yes, my personal decision	safe	very good	not interested	never	impossible	addicted	good intension	strong disagree	strong disagree	agree	strong disagree	strong agree	agree	strong agree	Bad Perception
Dessie	18-35	female	single	good	normal weight	higher education	3 meal	yes, always	peer pres	yes, som	mixture	alcohol	incr meta	heated	beef	easy to prepare	nothing	once a day	launch	Not Dependent	no	safe	sufficient	in dilemma	may be	easy	good to health	good intension	agree	strong agree	strong agree	agree	agree	agree	strong agree	Bad Perception
Dessie	18-35	female	single	good	normal weight	higher education	3 meal	yes, always	intentional	yes, som	mixture	alcohol	kill micro	heated	beef	cheers me	nothing	1-3t month	launch	Not Dependent	yes, advice by doctor	unsafe	insufficient	moderate interested	may be	easy	no alternative	good intension	neutral	agree	strong agree	agree	agree	agree	strong agree	Bad Perception
Dessie	18-35	male	married	good	normal weight	secondary school	3 meal	yes, always	habit fr an	yes, most	mixture	alcohol	incr meta	heated	beef	my traditi	nothing	once a day	launch	Not Dependent	yes, my personal decision	neutral	good	in dilemma	immediately stop	very easy	good to health	good intension	disagree	disagree	strong disagree	agree	neutral	disagree	strong disagree	Bad Perception
Dessie	18-35	female	single	good	normal weight	higher education	3 meal	yes, sometimes	peer pres	yes, som	chili pep	tea & coff	my habit	raw beef	beef	cheers me	nothing	few time we	launch	Not Dependent	no	unsafe	sufficient	not interested	may be	easy	good to health	good intension	disagree	disagree	agree	disagree	agree	neutral	disagree	Bad Perception
Dessie	18-35	male	single	good	normal weight	higher education	3 meal	yes, sometimes	I don't re	yes, som	chili pep	alcohol	good feel	heated	beef	easy to prepare	nothing	only holy	dinner	Not Dependent	yes, my personal decision	neutral	sufficient	moderate interested	never	easy	addicted	good intension	agree	agree	agree	neutral	agree	neutral	neutral	Bad Perception
Dessie	18-35	male	single	very good	normal weight	higher education	3 meal	yes, sometimes	habit fr an	yes, som	chili pep	alcohol	good feel	heated	beef	high nutr	nothing	only holy	launch	Not Dependent	no	unsafe	sufficient	moderate interested	may be	easy	I didn't believe	good intension	agree	neutral	neutral	agree	agree	neutral	neutral	Good Perception
Dessie	18-35	male	single	good	normal weight	higher education	3 meal	yes, always	peer pres	yes, som	pepper	other	incr meta	heated	mutton	easy to prepare	nothing	1-3t month	launch	Not Dependent	yes, my personal decision	unsafe	sufficient	highly interested	immediately stop	very easy	no alternative	good intension	strong agree	strong agree	disagree	strong disagree	strong agree	strong agree	strong agree	Good Perception
Dessie	36-50	male	married	good	normal weight	primary school	2 meal	no	peer pres	yes, most	mixture	other	good feel	raw beef	beef	my traditi	nothing	once a week	breakfast	Dependent	no	I don't know	good	moderate interested	may be	easy	I didn't believe	good intension	disagree	strong disagree	agree	disagree	agree	neutral	disagree	Bad Perception
Dessie	18-35	male	single	very good	normal weight	higher education	2 meal	yes, sometimes	I don't re	yes, som	mixture	tea & coff	my habit	heated	beef	high nutr	nothing	1-3t month	launch	Not Dependent	no	safe	good	moderate interested	immediately stop	not easy	addicted	good intension	disagree	disagree	neutral	strong disagree	disagree	agree	agree	Bad Perception
Dessie	18-35	male	single	excellent	normal weight	higher education	2 meal	yes, always	habit fr an	yes, most	mixture	other	good feel	raw beef	beef	cheers me	nothing	only holy	breakfast	Not Dependent	no	neutral	insufficient	in dilemma	may be	not easy	I didn't believe	bad intension	neutral	disagree	neutral	agree	neutral	agree	strong agree	Bad Perception
Dessie	18-35	male	single	good	normal weight	higher education	3 meal	yes, always	I don't re	yes, som	chili pep	other	good feel	heated	beef	keeps me	nothing	once a week	all meals	Not Dependent	yes, my personal decision	neutral	insufficient	highly interested	may be	easy	good to health	good intension	disagree	strong disagree	neutral	neutral	disagree	neutral	disagree	Bad Perception
Dessie	>50	female	single	very good	normal weight	secondary school	4 meal	no	I don't re	yes, som	mixture	tea & coff	my habit	heated	beef	easy to prepare	nothing	once a day	launch	Not Dependent	no	safe	good	highly interested	immediately stop	easy	good to health	good intension	disagree	agree	agree	strong disagree	agree	neutral	agree	Bad Perception
Dessie	18-35	male	single	very good	normal weight	higher education	3 meal	yes, sometimes	habit fr an	yes, som	chili pep	tea & coff	good feel	heated	beef	cheers me	uncomfor	few time we	launch	Not Dependent	no	I don't know	good	moderate interested	may be	not easy	addicted	good intension	disagree	disagree	agree	strong agree	strong agree	agree	agree	Bad Perception
Dessie	36-50	male	single	very good	normal weight	secondary school	3 meal	no	habit fr an	yes, som	mixture	alcohol	my habit	heated	beef	my traditi	nothing	1-3t month	all meals	Not Dependent	yes, my personal decision	neutral	sufficient	moderate interested	may be	not easy	addicted	good intension	agree	disagree	strong agree	strong agree	agree	agree	strong agree	Bad Perception
Dessie	18-35	male	single	excellent	normal weight	secondary school	3 meal	yes, always	intentional	yes, som	pepper	tea & coff	my habit	heated	beef	high nutr	uncomfor	few time we	launch	Not Dependent	no	safe	good	highly interested	never	unsure	addicted	good intension	disagree	disagree	strong agree	agree	strong agree	agree	agree	Bad Perception
Dessie	18-35	male	single	excellent	normal weight	secondary school	3 meal	yes, sometimes	I don't re	yes, som	mixture	other	incr meta	raw beef	beef	keeps me	nothing	1-3t month	launch	Not Dependent	yes, my personal decision	unsafe	sufficient	in dilemma	never	not easy	addicted	good intension	strong agree	agree	disagree	disagree	strong agree	strong agree	strong agree	Good Perception
Dessie	18-35	male	single	very good	normal weight	higher education	3 meal	yes, always	I don't re	yes, most	mixture	alcohol	kill micro	heated	beef	my traditi	uncomfor	1-3t month	all meals	Not Dependent	yes, advice by doctor	unsafe	very good	not interested	need time	unsure	addicted	good intension	strong agree	agree	strong agree	disagree	strong agree	agree	strong agree	Bad Perception
Dessie	18-35	male	single	very good	normal weight	higher education	3 meal	yes, always	habit fr an	yes, som	pepper	physical ex	good feel	raw beef	beef	easy to prepare	nothing	only holy	breakfast	Not Dependent	no	neutral	sufficient	highly interested	may be	unsure	good to health	good intension	agree	strong disagree	strong agree	strong agree	strong agree	strong disagree	agree	Bad Perception
Dessie	36-50	male	married	excellent	normal weight	higher education	3 meal	yes, always	intentional	yes, som	mixture	alcohol	my habit	heated	beef	my traditi	nothing	1-3t month	breakfast	Not Dependent	no	safe	good	in dilemma	may be	easy	good to health	good intension	agree	neutral	disagree	strong disagree	strong agree	agree	agree	Good Perception
Dessie	18-35	male	single	very good	normal weight	higher education	3 meal	yes, always	habit fr an	yes, som	pepper	tea & coff	incr meta	heated	beef	my traditi	nothing	only holy	launch	Not Dependent	yes, my personal decision	unsafe	sufficient	highly interested	may be	easy	addicted	good intension	strong agree	agree	disagree	strong disagree	agree	agree	strong disagree	Bad Perception
Dessie	36-50	male	single	good	normal weight	primary school	3 meal	no	intentional	yes, som	mixture	other	my habit	raw beef	beef	my traditi	nothing	once a day	launch	Dependent	no	neutral	sufficient	not interested	may be	very easy	good to health	good intension	agree	disagree	agree	neutral	agree	disagree	disagree	Bad Perception
Dessie	18-35	female	single	good	normal weight	higher education	3 meal	yes, sometimes	I don't re	yes, som	mixture	other	my habit	heated	beef	my traditi	nothing	few time day	launch	Not Dependent	yes, my personal decision	safe	sufficient	in dilemma	immediately stop	easy	no alternative	good intension	agree	disagree	disagree	disagree	agree	neutral	disagree	Bad Perception
Dessie	36-50	female	married	very good	normal weight	higher education	3 meal	yes, always	habit fr an	yes, som	mixture	tea & coff	my habit	raw beef	beef	easy to prepare	uncomfor	only holy	dinner	Not Dependent	yes, my personal decision	safe	good	moderate interested	immediately stop	easy	addicted	good intension	strong agree	agree	strong disagree	strong disagree	strong agree	strong agree	strong agree	Good Perception
Dessie	18-35	male	single	good	normal weight	higher education	3 meal	yes, sometimes	I don't re	yes, most	mixture	alcohol	incr meta	heated	beef	easy to prepare	nothing	only holy	dinner	Not Dependent	no	unsafe	insufficient	moderate interested	need time	unsure	I didn't believe	good intension	strong agree	strong agree	strong agree	strong disagree	strong agree	strong agree	strong agree	Bad Perception
Dessie	18-35	male	single	good	normal weight	secondary school	3 meal	yes, always	I don't re	yes, most	chili pep	alcohol	incr meta	heated	beef	keeps me	nothing	1-3t month	launch	Not Dependent	no	unsafe	insufficient	moderate interested	may be	easy	good to health	good intension	agree	disagree	agree	disagree	agree	disagree	strong disagree	Bad Perception
Dessie	36-50	male	single	very good	over weight	higher education	3 meal	no	intentional	yes, som	chili pep	tea & coff	good feel	raw beef	mutton	easy to prepare	nothing	few time we	launch	Not Dependent	no	unsafe	sufficient	not interested	may be	easy	no alternative	good intension	strong disagree	neutral	disagree	strong agree	agree	strong disagree	disagree	Bad Perception
Dessie	36-50	female	single	very good	normal weight	higher education	3 meal	yes, always	I don't re	yes, som	pepper	alcohol	incr meta	heated	beef	easy to prepare	nothing	once a week	launch	Not Dependent	no	safe	good	highly interested	may be	easy	I didn't believe	good intension	neutral	agree	agree	agree	strong agree	agree	neutral	Bad Perception
Dessie	18-35	female	single	excellent	normal weight	higher education	3 meal	no	habit fr an	yes, som	mixture	other	good feel	heated	mutton	cheers me	uncomfor	1-3t month	launch	Not Dependent	yes, my personal decision	unsafe	sufficient	highly interested	immediately stop	easy	good to health	good intension	agree	neutral	disagree	neutral	strong agree	agree	agree	Good Perception
Dessie	18-35	female	single	very good	normal weight	higher education	3 meal	yes, always	I don't re	yes, som	mixture	other	good feel	heated	mutton	my traditi	nothing	1-3t month	launch	Not Dependent	yes, my personal decision	unsafe	sufficient	highly interested	immediately stop	easy	good to health	good intension	agree	disagree	disagree	disagree	agree	neutral	agree	Bad Perception
Dessie	18-35	female	single	good	normal weight	secondary school	3 meal	yes, always	I don't re	yes, som	mixture	other	good feel	heated	mutton	my traditi	nothing	few time we	launch	Not Dependent	yes, my personal decision	unsafe	sufficient	highly interested	immediately stop	very easy	good to health	good intension	agree	disagree	disagree	disagree	agree	agree	agree	Bad Perception
Dessie	18-35	female	single	very good	normal weight	higher education	3 meal	yes, always	peer pres	yes, som	pepper	alcohol	incr meta	heated	mutton	cheep	nothing	only holy	launch	Not Dependent	yes, my personal decision	I don't know	good	highly interested	immediately stop	very easy	I didn't believe	good intension	strong agree	strong agree	disagree	strong disagree	strong agree	agree	strong agree	Good Perception
Dessie	18-35	male	single	excellent	normal weight	higher education	3 meal	yes, always	I don't re	yes, som	pepper	alcohol	kill micro	raw beef	beef	keeps me	nothing	once a week	dinner	Dependent	no	safe	sufficient	moderate interested	may be	easy	I didn't believe	good intension	neutral	agree	strong agree	agree	agree	neutral	agree	Bad Perception
Dessie	18-35	female	single	good	normal weight	higher education	3 meal	yes, sometimes	intentional	yes, som	chili pep	alcohol	my habit	heated	mutton	keeps me	nothing	once a day	launch	Not Dependent	yes, my personal decision	unsafe	sufficient	in dilemma	immediately stop	very easy	good to health	good intension	disagree	strong disagree	disagree	disagree	agree	disagree	strong disagree	Bad Perception
Dessie	36-50	male	married	very good	normal weight	higher education	2 meal	no	peer pres	yes, most	chili pep	tea & coff	good feel	heated	beef	my traditi	uncomfor	few time we	launch	Not Dependent	no	safe	insufficient	not interested	never	not easy	addicted	bad intension	disagree	disagree	agree	strong disagree	agree	disagree	disagree	Bad Perception
Dessie	36-50	female	married	good	normal weight	secondary school	3 meal	yes, always	habit fr an	yes, som	pepper	alcohol	incr meta	heated	beef	high nutr	nothing	1-3t month	launch	Not Dependent	yes, my personal decision	neutral	good	highly interested	may be	easy	no alternative	good intension	agree	disagree	agree	disagree	agree	strong disagree	disagree	Bad Perception
Dessie	>50	male	single	good	normal weight	higher education	3 meal	yes, always	habit fr an	yes, som	chili pep	alcohol	incr meta	heated	beef	my traditi	nothing	once a day	launch	Not Dependent	no	safe	sufficient	moderate interested	immediately stop	easy	good to health	good intension	agree	disagree	agree	disagree	strong agree	neutral	disagree	Bad Perception
Dessie	18-35	male	single	very good	normal weight	secondary school	3 meal	yes, sometimes	peer pres	yes, som	chili pep	tea & coff	my habit	heated	beef	cheers me	nothing	1-3t month	launch	Not Dependent	no	safe	insufficient	highly interested	may be	easy	good to health	good intension	agree	disagree	agree	disagree	agree	disagree	disagree	Bad Perception
Dessie	18-35	female	single	good	normal weight	higher education	3 meal	yes, always	I don't re	yes, most	pepper	other	incr meta	heated	beef	my traditi	nothing	once a day	breakfast	Not Dependent	no	unsafe	insufficient	moderate interested	immediately stop	easy	no alternative	good intension	agree	strong disagree	agree	disagree	strong agree	neutral	disagree	Bad Perception
Dessie	18-35	female	single	very good	normal weight	secondary school	3 meal	yes, sometimes	habit fr an	yes, som	chili pep	other	good feel	heated	mutton	keeps me	nothing	1-3t month	breakfast	Not Dependent	yes, my personal decision	neutral	good	not interested	never	unsure	addicted	good intension	disagree	strong disagree	agree	strong disagree	agree	neutral	disagree	Bad Perception
Dessie	18-35	male	single	good	normal weight	higher education	3 meal	yes, always	peer pres	yes, som	mixture	alcohol	incr meta	heated	beef	cheers me	nothing	once a day	launch	Not Dependent	no	unsafe	sufficient	moderate interested	may be	easy	good to health	good intension	disagree	disagree	agree	disagree	agree	disagree	disagree	Bad Perception
Dessie	36-50	male	married	good	normal weight	higher education	3 meal	yes, always	intentional	yes, most	mixture	alcohol	incr meta	heated	beef	my traditi	uncomfor	1-3t month	launch	Not Dependent	no	safe	sufficient	not interested	never	not easy	addicted	bad intension	disagree	strong disagree	agree	agree	agree	disagree	strong disagree	Bad Perception
Dessie	>50	male	single	good	normal weight	higher education	3 meal	yes, always	habit fr an	yes, som	mixture	alcohol	incr meta	heated	beef	my traditi	nothing	once a day	launch	Not Dependent	yes, my personal decision	safe	sufficient	not interested	immediately stop	easy	good to health	good intension	disagree	disagree	disagree	disagree	agree	neutral	disagree	Bad Perception
Dessie	18-35	female	married	good	normal weight	higher education	3 meal	yes, always	I don't re	yes, som	chili pep	tea & coff	my habit	heated	beef	cheers me	nothing	1-3t month	launch	Not Dependent	yes, my personal decision	I don't know	sufficient	moderate interested	may be	easy	good to health	good intension	disagree	strong disagree	agree	disagree	agree	disagree	disagree	Bad Perception
Dessie	18-35	male	single	good	normal weight	higher education	3 meal	yes, sometimes	intentional	yes, most	pepper	other	incr meta	raw beef	beef	high nutr	nothing	once a week	launch	Dependent	no	safe	insufficient	moderate interested	need time	unsure	no alternative	good intension	agree	disagree	agree	disagree	agree	disagree	agree	Bad Perception
Dessie	36-50	male	widow	good	normal weight	secondary school	3 meal	yes, sometimes	peer pres	yes, som	mixture	alcohol	incr meta	raw beef	beef	cheers me	uncomfor	once a day	launch	Dependent	no	unsafe	insufficient	not interested	may be	unsure	good to health	good intension	agree	disagree	disagree	neutral	strong agree	neutral	disagree	Bad Perception
Dessie	18-35	male	single	good	normal weight	secondary school	3 meal	yes, always	intentional	yes, som	mixture	tea & coff	good feel	heated	beef	cheers me	nothing	1-3t month	launch	Not Dependent	yes, my personal decision	safe	sufficient	not interested	may be	easy	good to health	good intension	agree	disagree	strong disagree	disagree	agree	neutral	disagree	Bad Perception
Dessie	18-35	male	single	good	normal weight	higher education	3 meal	yes, always	I don't re	yes, som	mixture	other	incr meta	heated	mutton	cheers me	nothing	once a week	launch	Not Dependent	yes, my personal decision	unsafe	sufficient	highly interested	immediately stop	easy	good to health	good intension	agree	agree	strong agree	disagree	agree	neutral	agree	Bad Perception
Dessie	18-35	female	single	good	normal weight	secondary school	4 meal	yes, sometimes	peer pres	yes, som	chili pep	alcohol	incr meta	heated	beef	cheers me	nothing	only holy	launch	Not Dependent	no	safe	sufficient	not interested	may be	impossible	addicted	bad intension	strong disagree	disagree	disagree	agree	strong agree	neutral	strong agree	Bad Perception
Dessie	>50	male	married	good	normal weight	higher education	3 meal	yes, sometimes	habit fr an	yes, som	mixture	alcohol	incr meta	heated	beef	high nutr	nothing	once a week	launch	Not Dependent	yes, my personal decision	unsafe	good	highly interested	immediately stop	easy	addicted	good intension	agree	neutral	agree	disagree	strong agree	strong agree	agree	Bad Perception
Dessie	36-50	male	single	good	normal weight	secondary school	3 meal	yes, sometimes	peer pres	yes, som	chili pep	alcohol	no reason	heated	beef	cheers me	nothing	once a week	launch	Not Dependent	no	safe	insufficient	not interested	never	not easy	I didn't believe	bad intension	strong disagree	strong disagree	agree	agree	disagree	disagree	agree	Bad Perception
Dessie	36-50	male	married	good	normal weight	higher education	3 meal	yes, always	intentional	yes, som	chili pep	alcohol	incr meta	heated	beef	keeps me	nothing	1-3t month	launch	Not Dependent	yes, advice by doctor	safe	sufficient	highly interested	immediately stop	easy	I didn't believe	good intension	agree	disagree	agree	strong agree	agree	neutral	agree	Bad Perception
Dessie	36-50	male	single	good	normal weight	primary school	3 meal	yes, always	intentional	yes, som	chili pep	other	no reason	heated	beef	cheers me	nothing	1-3t month	breakfast	Not Dependent	no	safe	insufficient	moderate interested	immediately stop	very easy	no alternative	good intension	agree	disagree	agree	disagree	strong agree	neutral	agree	Bad Perception
Dessie	18-35	female	married	very good	normal weight	higher education	2 meal	no	peer pres	yes, som	mixture	tea & coff	good feel	heated	beef	cheep	nothing	few time we	launch	Not Dependent	yes, advice by doctor	safe	sufficient	in dilemma	may be	easy	good to health	good intension	disagree	disagree	agree	disagree	neutral	agree	neutral	Bad Perception
Dessie	36-50	male	single	very good	normal weight	higher education	3 meal	yes, always	habit fr an	yes, som	mixture	tea & coff	no reason	raw beef	beef	keeps me	nothing	few time we	dinner	Not Dependent	no	safe	sufficient	not interested	need time	unsure	no alternative	bad intension	strong disagree	disagree	agree	strong agree	strong agree	neutral	neutral	Bad Perception
Dessie	18-35	female	single	good	normal weight	secondary school	3 meal	no	peer pres	yes, som	mixture	other	no reason	raw beef	beef	cheep	nothing	once a day	dinner	Dependent	no	neutral	insufficient	moderate interested	never	not easy	addicted	good intension	neutral	strong disagree	agree	strong agree	strong agree	agree	agree	Bad Perception
Dessie	>50	female	married	good	normal weight	primary school	2 meal	yes, sometimes	habit fr an	yes, som	pepper	alcohol	no reason	raw beef	beef	easy to prepare	nothing	only holy	breakfast	Not Dependent	no	I don't know	insufficient	strongly not interested	never	impossible	I didn't believe	bad intension	strong disagree	disagree	neutral	disagree	neutral	neutral	neutral	Bad Perception
Dessie	36-50	female	single	good	normal weight	secondary school	3 meal	yes, always	peer pres	yes, som	mixture	tea & coff	no reason	raw beef	beef	my traditi	nothing	few time we	all meals	Not Dependent	yes, my personal decision	safe	good	moderate interested	may be	easy	addicted	good intension	strong agree	agree	neutral	strong agree	agree	strong agree	strong agree	Good Perception
Dessie	18-35	male	single	good	normal weight	higher education	3 meal	yes, sometimes	I don't re	yes, som	mixture	tea & coff	good feel	raw beef	beef	cheers me	uncomfor	few time day	launch	Dependent	no	neutral	good	moderate interested	may be	not easy	I didn't believe	good intension	disagree	strong disagree	neutral	strong agree	strong agree	agree	strong agree	Bad Perception
Dessie	36-50	female	married	good	normal weight	secondary school	3 meal	yes, always	habit fr an	yes, most	mixture	tea & coff	good feel	raw beef	beef	cheers me	nothing	few time we	launch	Dependent	no	unsafe	sufficient	not interested	never	not easy	addicted	good intension	agree	disagree	neutral	disagree	neutral	agree	strong agree	Bad Perception
Dessie	18-35	female	single	good	normal weight	higher education	2 meal	yes, sometimes	I don't re	yes, som	mixture	tea & coff	good feel	raw beef	beef	keeps me	uncomfor	once a day	breakfast	Dependent	yes, advice by doctor	unsafe	sufficient	moderate interested	may be	not easy	I didn't believe	good intension	strong disagree	strong disagree	neutral	neutral	agree	neutral	strong agree	Bad Perception
Dessie	36-50	male	married	good	normal weight	secondary school	3 meal	yes, always	habit fr an	yes, most	chili pep	alcohol	my habit	raw beef	beef	keeps me	nothing	once a day	dinner	Dependent	no	I don't know	good	not interested	immediately stop	very easy	no alternative	good intension	strong disagree	disagree	neutral	strong agree	agree	agree	neutral	Bad Perception
Dessie	18-35	male	single	good	normal weight	higher education	3 meal	yes, sometimes	I don't re	yes, som	pepper	tea & coff	good feel	raw beef	beef	cheers me	uncomfor	few time we	launch	Dependent	no	neutral	sufficient	moderate interested	may be	easy	I didn't believe	good intension	strong disagree	disagree	agree	strong agree	strong agree	agree	neutral	Bad Perception
Dessie	>50	male	married	good	normal weight	primary school	2 meal	yes, sometimes	habit fr an	yes, som	mixture	alcohol	no reason	heated	beef	easy to prepare	nothing	few time day	launch	Not Dependent	yes, my personal decision	safe	sufficient	in dilemma	need time	unsure	no alternative	good intension	strong disagree	strong disagree	neutral	neutral	strong agree	neutral	strong agree	Bad Perception
Dessie	36-50	male	single	very good	obese	higher education	3 meal	yes, always	habit fr an	yes, som	mixture	alcohol	incr meta	heated	beef	my traditi	nothing	once a week	launch	Not Dependent	no	safe	sufficient	moderate interested	may be	easy	good to health	good intension	agree	disagree	agree	strong disagree	agree	neutral	strong disagree	Bad Perception
Dessie	36-50	female	married	good	normal weight	secondary school	3 meal	yes, sometimes	intentional	yes, som	chili pep	tea & coff	good feel	heated	mutton	keeps me	nothing	only holy	launch	Not Dependent	no	safe	insufficient	moderate interested	immediately stop	very easy	good to health	good intension	agree	disagree	agree	disagree	strong agree	agree	agree	Bad Perception
Dessie	>50	male	single	good	normal weight	higher education	3 meal	yes, always	habit fr an	yes, most	mixture	alcohol	incr meta	heated	beef	my traditi	nothing	1-3t month	launch	Not Dependent	no	safe	sufficient	highly interested	immediately stop	easy	good to health	good intension	agree	disagree	agree	disagree	agree	disagree	strong disagree	Bad Perception
Dessie	18-35	male	married	very good	normal weight	primary school	3 meal	yes, sometimes	I don't re	yes, som	chili pep	alcohol	incr meta	heated	beef	high nutr	hunger	once a day	launch	Not Dependent	no	safe	insufficient	not interested	never	impossible	I didn't believe	bad intension	disagree	disagree	agree	agree	agree	disagree	disagree	Bad Perception
Dessie	18-35	female	single	good	normal weight	secondary school	3 meal	yes, always	intentional	yes, som	pepper	alcohol	my habit	raw beef	mutton	cheers me	nothing	once a day	launch	Dependent	yes, my personal decision	neutral	good	in dilemma	may be	easy	no alternative	good intension	agree	disagree	agree	disagree	agree	disagree	disagree	Bad Perception
Dessie	36-50	male	single	good	normal weight	secondary school	3 meal	yes, always	habit fr an	yes, most	mixture	alcohol	incr meta	heated	beef	keeps me	uncomfor	1-3t month	launch	Not Dependent	no	safe	sufficient	moderate interested	may be	easy	good to health	good intension	agree	disagree	agree	disagree	agree	neutral	disagree	Bad Perception
Dessie	18-35	male	single	very good	normal weight	higher education	3 meal	yes, always	peer pres	yes, som	chili pep	alcohol	incr meta	heated	beef	cheers me	nothing	1-3t month	launch	Not Dependent	no	safe	sufficient	moderate interested	may be	easy	good to health	good intension	agree	strong disagree	agree	disagree	strong agree	disagree	strong disagree	Bad Perception
Dessie	18-35	female	single	good	normal weight	higher education	3 meal	yes, always	habit fr an	yes, som	chili pep	tea & coff	my habit	heated	beef	my traditi	nothing	once a day	launch	Not Dependent	no	safe	sufficient	highly interested	may be	easy	no alternative	good intension	agree	disagree	agree	disagree	agree	neutral	disagree	Bad Perception
Dessie	18-35	male	single	very good	normal weight	higher education	3 meal	yes, sometimes	I don't re	yes, som	mixture	physical ex	incr meta	heated	beef	easy to prepare	nothing	1-3t month	breakfast	Not Dependent	no	safe	good	moderate interested	may be	easy	good to health	good intension	agree	agree	neutral	disagree	agree	neutral	agree	Good Perception
Dessie	18-35	female	single	very good	normal weight	secondary school	1 meal	yes, sometimes	habit fr an	yes, most	mixture	tea & coff	good feel	raw beef	mutton	high nutr	uncomfor	1-3t month	breakfast	Dependent	no	unsafe	good	moderate interested	need time	unsure	no alternative	good intension	agree	neutral	neutral	disagree	neutral	agree	strong agree	Good Perception
Dessie	18-35	male	single	excellent	normal weight	higher education	2 meal	yes, sometimes	habit fr an	yes, som	chili pep	alcohol	kill micro	raw beef	beef	my traditi	nothing	1-3t month	launch	Dependent	no	safe	good	moderate interested	may be	unsure	addicted	good intension	neutral	strong disagree	neutral	disagree	strong agree	agree	strong agree	Bad Perception
Dessie	18-35	male	single	excellent	normal weight	higher education	2 meal	yes, sometimes	habit fr an	yes, most	mixture	alcohol	good feel	raw beef	beef	my traditi	nothing	1-3t month	launch	Not Dependent	no	safe	sufficient	moderate interested	never	unsure	addicted	good intension	neutral	strong disagree	neutral	disagree	strong agree	agree	strong agree	Bad Perception
Dessie	18-35	male	single	very good	normal weight	secondary school	3 meal	no	I don't re	yes, som	chili pep	alcohol	incr meta	heated	beef	cheers me	hunger	1-3t month	launch	Not Dependent	no	unsafe	sufficient	not interested	may be	impossible	addicted	good intension	disagree	disagree	agree	agree	strong agree	neutral	disagree	Bad Perception
Dessie	18-35	female	single	good	normal weight	higher education	3 meal	yes, sometimes	I don't re	yes, most	mixture	alcohol	incr meta	raw beef	mutton	my traditi	uncomfor	1-3t month	all meals	Not Dependent	no	neutral	sufficient	moderate interested	need time	not easy	addicted	good intension	agree	strong disagree	disagree	agree	agree	agree	agree	Bad Perception
Dessie	18-35	male	single	very good	normal weight	higher education	3 meal	no	habit fr an	yes, som	chili pep	alcohol	my habit	heated	beef	easy to prepare	nothing	only holy	all meals	Not Dependent	no	unsafe	very good	highly interested	may be	not easy	no alternative	good intension	strong agree	disagree	disagree	strong disagree	strong agree	agree	strong agree	Bad Perception
Dessie	36-50	female	married	good	normal weight	primary school	3 meal	no	I don't re	yes, som	chili pep	other	good feel	raw beef	beef	cheers me	nothing	once a day	dinner	Not Dependent	yes, my personal decision	neutral	insufficient	moderate interested	immediately stop	very easy	I didn't believe	good intension	neutral	neutral	neutral	strong agree	agree	agree	agree	Good Perception
Dessie	36-50	male	single	good	normal weight	secondary school	2 meal	yes, sometimes	habit fr an	yes, most	pepper	physical ex	my habit	raw beef	beef	my traditi	nothing	few time day	all meals	Not Dependent	no	I don't know	sufficient	not interested	need time	impossible	addicted	bad intension	neutral	strong disagree	neutral	strong agree	agree	neutral	disagree	Bad Perception
Dessie	18-35	female	married	good	normal weight	higher education	3 meal	yes, sometimes	I don't re	yes, som	mixture	other	incr meta	heated	beef	cheers me	nothing	once a day	launch	Not Dependent	no	unsafe	insufficient	moderate interested	never	not easy	addicted	good intension	agree	strong disagree	disagree	strong disagree	strong agree	neutral	disagree	Bad Perception
Dessie	36-50	female	single	good	normal weight	higher education	3 meal	yes, always	intentional	yes, som	chili pep	tea & coff	my habit	heated	beef	my traditi	nothing	once a day	breakfast	Not Dependent	yes, my personal decision	neutral	sufficient	moderate interested	may be	easy	good to health	good intension	agree	strong disagree	disagree	strong disagree	strong agree	neutral	disagree	Bad Perception
Dessie	36-50	male	single	good	normal weight	secondary school	2 meal	yes, sometimes	I don't re	yes, most	mixture	other	good feel	heated	beef	cheers me	nothing	once a week	launch	Not Dependent	yes, my personal decision	neutral	sufficient	moderate interested	immediately stop	very easy	good to health	good intension	strong agree	disagree	neutral	disagree	agree	neutral	agree	Bad Perception
Dessie	18-35	male	single	good	normal weight	secondary school	3 meal	yes, always	habit fr an	yes, som	mixture	tea & coff	good feel	heated	beef	my traditi	nothing	once a week	launch	Not Dependent	yes, my personal decision	unsafe	sufficient	moderate interested	immediately stop	easy	good to health	good intension	agree	strong disagree	neutral	disagree	strong agree	disagree	strong disagree	Bad Perception
Dessie	18-35	male	single	good	normal weight	higher education	3 meal	yes, sometimes	habit fr an	yes, som	pepper	alcohol	kill micro	raw beef	beef	my traditi	nothing	only holy	launch	Not Dependent	no	safe	good	moderate interested	may be	easy	good to health	good intension	disagree	disagree	agree	agree	agree	disagree	disagree	Bad Perception
Dessie	18-35	male	single	very good	normal weight	higher education	3 meal	yes, always	I don't re	yes, most	mixture	other	my habit	heated	beef	cheers me	nothing	only holy	launch	Not Dependent	yes, my personal decision	safe	insufficient	moderate interested	immediately stop	easy	no alternative	good intension	disagree	strong disagree	disagree	disagree	agree	neutral	agree	Bad Perception
Dessie	36-50	male	married	good	normal weight	higher education	3 meal	yes, always	habit fr an	yes, som	mixture	other	good feel	heated	beef	my traditi	nothing	once a week	launch	Not Dependent	yes, my personal decision	safe	sufficient	highly interested	immediately stop	easy	good to health	good intension	disagree	strong disagree	disagree	strong disagree	agree	neutral	disagree	Bad Perception
Dessie	18-35	female	single	good	normal weight	higher education	3 meal	yes, always	habit fr an	yes, som	mixture	other	incr meta	heated	beef	my traditi	nothing	only holy	launch	Not Dependent	yes, my personal decision	safe	sufficient	moderate interested	immediately stop	easy	good to health	good intension	agree	disagree	agree	disagree	strong agree	neutral	disagree	Bad Perception
Dessie	36-50	male	married	good	normal weight	secondary school	2 meal	yes, sometimes	intentional	yes, som	mixture	tea & coff	incr meta	heated	beef	high nutr	nothing	once a day	launch	Not Dependent	no	safe	sufficient	moderate interested	may be	easy	good to health	good intension	disagree	strong disagree	disagree	strong disagree	agree	disagree	strong disagree	Bad Perception
Dessie	18-35	male	single	very good	normal weight	higher education	3 meal	yes, always	I don't re	yes, most	mixture	tea & coff	my habit	heated	beef	cheers me	nothing	few time we	launch	Not Dependent	yes, my personal decision	safe	insufficient	moderate interested	immediately stop	easy	good to health	good intension	disagree	strong disagree	disagree	disagree	agree	neutral	disagree	Bad Perception
Dessie	18-35	male	single	good	normal weight	higher education	3 meal	yes, always	habit fr an	yes, som	mixture	alcohol	my habit	raw beef	beef	cheers me	nothing	only holy	launch	Not Dependent	no	unsafe	sufficient	in dilemma	never	not easy	addicted	good intension	agree	neutral	agree	agree	strong agree	agree	strong agree	Bad Perception
Dessie	18-35	female	single	good	normal weight	secondary school	3 meal	no	I don't re	yes, som	mixture	other	incr meta	heated	beef	cheers me	nothing	few time we	launch	Not Dependent	no	I don't know	good	not interested	immediately stop	very easy	addicted	good intension	agree	disagree	strong agree	disagree	disagree	neutral	disagree	Bad Perception
Dessie	18-35	male	single	good	normal weight	higher education	3 meal	yes, sometimes	I don't re	yes, som	chili pep	alcohol	kill micro	raw beef	beef	easy to prepare	nothing	only holy	dinner	Not Dependent	no	I don't know	insufficient	highly interested	may be	unsure	good to health	good intension	agree	neutral	neutral	disagree	neutral	neutral	neutral	Good Perception
Dessie	18-35	female	single	good	normal weight	higher education	3 meal	yes, always	habit fr an	yes, most	mixture	alcohol	incr meta	heated	beef	my traditi	hunger	once a day	launch	Not Dependent	no	safe	good	in dilemma	never	not easy	addicted	bad intension	disagree	strong disagree	strong disagree	neutral	strong agree	agree	agree	Bad Perception
Dessie	18-35	male	single	excellent	normal weight	higher education	3 meal	yes, sometimes	I don't re	yes, som	mixture	other	incr meta	heated	beef	cheers me	nothing	once a day	launch	Not Dependent	no	unsafe	insufficient	highly interested	immediately stop	very easy	good to health	good intension	agree	disagree	agree	disagree	strong agree	neutral	disagree	Bad Perception
Dessie	18-35	male	single	very good	normal weight	higher education	4 meal	yes, sometimes	peer pres	yes, most	chili pep	alcohol	kill micro	raw beef	mutton	my traditi	nothing	1-3t month	launch	Dependent	yes, my personal decision	I don't know	sufficient	not interested	may be	unsure	good to health	good intension	agree	strong disagree	neutral	neutral	agree	neutral	neutral	Bad Perception
Dessie	18-35	male	single	excellent	normal weight	higher education	2 meal	yes, sometimes	I don't re	yes, som	mixture	physical ex	my habit	raw beef	beef	my traditi	nothing	few time we	launch	Not Dependent	yes, my personal decision	neutral	good	in dilemma	may be	easy	good to health	good intension	agree	strong disagree	agree	neutral	agree	neutral	agree	Bad Perception
Dessie	18-35	male	single	excellent	normal weight	higher education	3 meal	yes, sometimes	I don't re	yes, som	chili pep	other	incr meta	raw beef	beef	high nutr	nothing	only holy	breakfast	Not Dependent	yes, my personal decision	unsafe	good	not interested	immediately stop	very easy	good to health	good intension	agree	strong disagree	agree	agree	strong agree	disagree	disagree	Bad Perception
Dessie	18-35	female	single	excellent	normal weight	higher education	3 meal	yes, always	habit fr an	yes, som	mixture	other	no reason	heated	beef	my traditi	hunger	only holy	launch	Not Dependent	yes, my personal decision	neutral	good	moderate interested	need time	unsure	good to health	good intension	disagree	strong disagree	strong disagree	neutral	strong agree	agree	agree	Bad Perception
Dessie	36-50	male	married	good	normal weight	higher education	4 meal	yes, sometimes	habit fr an	yes, most	chili pep	alcohol	incr meta	raw beef	beef	cheers me	uncomfor	few time we	all meals	Dependent	no	unsafe	sufficient	not interested	never	not easy	addicted	good intension	strong agree	strong agree	strong agree	strong disagree	strong agree	neutral	strong agree	Bad Perception
Dessie	36-50	male	single	good	normal weight	higher education	3 meal	no	habit fr an	yes, most	chili pep	alcohol	incr meta	heated	beef	my traditi	nothing	only holy	launch	Not Dependent	no	safe	sufficient	moderate interested	immediately stop	easy	good to health	good intension	strong agree	neutral	strong disagree	strong agree	strong agree	neutral	strong agree	Good Perception
Dessie	18-35	male	single	good	normal weight	secondary school	3 meal	yes, always	peer pres	yes, most	chili pep	alcohol	good feel	raw beef	beef	cheers me	nothing	once a week	breakfast	Dependent	no	unsafe	sufficient	moderate interested	immediately stop	easy	good to health	good intension	strong agree	agree	agree	neutral	strong agree	neutral	strong agree	Bad Perception
Dessie	18-35	female	single	very good	normal weight	higher education	3 meal	yes, sometimes	I don't re	yes, som	pepper	alcohol	incr meta	heated	beef	keeps me	nothing	only holy	launch	Not Dependent	no	safe	insufficient	highly interested	need time	easy	good to health	good intension	disagree	neutral	agree	strong agree	strong disagree	neutral	agree	Bad Perception
Dessie	18-35	male	single	very good	normal weight	higher education	3 meal	yes, sometimes	habit fr an	yes, most	pepper	tea & coff	good feel	heated	beef	high nutr	nothing	only holy	launch	Not Dependent	no	I don't know	insufficient	highly interested	may be	easy	good to health	good intension	neutral	disagree	neutral	agree	strong agree	neutral	neutral	Bad Perception
Dessie	>50	male	married	good	normal weight	higher education	2 meal	yes, always	habit fr an	yes, som	mixture	other	incr meta	heated	mutton	my traditi	nothing	once a day	breakfast	Not Dependent	yes, advice by doctor	unsafe	sufficient	moderate interested	immediately stop	easy	good to health	good intension	agree	disagree	agree	disagree	agree	neutral	disagree	Bad Perception
Dessie	18-35	male	single	very good	normal weight	higher education	2 meal	yes, always	intentional	yes, som	pepper	tea & coff	good feel	raw beef	beef	my traditi	nothing	few time we	all meals	Not Dependent	no	safe	good	highly interested	need time	easy	good to health	good intension	neutral	disagree	strong agree	disagree	strong agree	neutral	neutral	Bad Perception
Dessie	18-35	male	single	good	normal weight	higher education	3 meal	yes, always	habit fr an	yes, som	pepper	alcohol	good feel	raw beef	beef	keeps me	hunger	only holy	breakfast	Not Dependent	no	safe	sufficient	highly interested	never	unsure	addicted	good intension	neutral	strong agree	strong agree	strong agree	agree	agree	neutral	Bad Perception
Dessie	36-50	male	married	good	normal weight	higher education	2 meal	yes, sometimes	intentional	yes, som	chili pep	other	my habit	heated	beef	cheers me	nothing	few time we	launch	Not Dependent	no	unsafe	insufficient	moderate interested	immediately stop	very easy	good to health	good intension	agree	strong disagree	agree	disagree	strong agree	neutral	disagree	Bad Perception
Dessie	36-50	male	married	good	normal weight	higher education	2 meal	no	habit fr an	yes, most	chili pep	alcohol	incr meta	raw beef	beef	keeps me	uncomfor	once a day	launch	Dependent	no	safe	sufficient	strongly not interested	never	not easy	addicted	bad intension	strong agree	strong agree	strong agree	agree	agree	neutral	strong agree	Bad Perception
Dessie	36-50	male	single	good	normal weight	higher education	3 meal	yes, always	habit fr an	yes, most	chili pep	tea & coff	incr meta	raw beef	beef	cheers me	nothing	1-3t month	launch	Dependent	no	safe	sufficient	moderate interested	immediately stop	easy	good to health	good intension	strong agree	strong agree	strong disagree	neutral	strong agree	neutral	strong agree	Good Perception
Dessie	18-35	female	widow	good	normal weight	secondary school	3 meal	no	intentional	yes, som	mixture	alcohol	incr meta	raw beef	beef	cheers me	nothing	once a day	launch	Dependent	no	I don't know	insufficient	not interested	never	unsure	I didn't believe	bad intension	disagree	strong disagree	agree	strong agree	agree	neutral	disagree	Bad Perception
Dessie	18-35	female	married	good	normal weight	secondary school	2 meal	yes, sometimes	habit fr an	yes, som	mixture	tea & coff	my habit	raw beef	beef	keeps me	uncomfor	few time we	launch	Not Dependent	no	safe	insufficient	in dilemma	immediately stop	easy	I didn't believe	good intension	strong agree	agree	agree	disagree	strong agree	disagree	strong disagree	Bad Perception
Dessie	18-35	male	single	very good	normal weight	higher education	3 meal	yes, sometimes	I don't re	yes, most	mixture	tea & coff	my habit	heated	beef	cheers me	nothing	once a week	launch	Not Dependent	no	I don't know	sufficient	highly interested	may be	unsure	no alternative	good intension	neutral	agree	neutral	disagree	agree	agree	agree	Good Perception
Dessie	18-35	male	single	very good	normal weight	higher education	3 meal	yes, sometimes	I don't re	yes, som	mixture	tea & coff	good feel	heated	beef	high nutr	nothing	once a week	all meals	Not Dependent	no	safe	insufficient	moderate interested	may be	not easy	good to health	good intension	strong agree	agree	strong disagree	disagree	agree	agree	strong agree	Good Perception
Dessie	18-35	male	single	excellent	normal weight	higher education	3 meal	yes, sometimes	I don't re	yes, som	chili pep	alcohol	good feel	raw beef	beef	high nutr	uncomfor	1-3t month	dinner	Dependent	no	neutral	good	moderate interested	may be	easy	good to health	good intension	agree	strong disagree	disagree	neutral	disagree	agree	strong disagree	Bad Perception
Dessie	36-50	male	married	good	normal weight	secondary school	3 meal	yes, sometimes	habit fr an	yes, som	chili pep	alcohol	incr meta	raw beef	mutton	my traditi	hunger	once a day	launch	Not Dependent	no	unsafe	good	not interested	may be	easy	good to health	good intension	agree	disagree	agree	strong disagree	strong agree	neutral	disagree	Bad Perception
Dessie	18-35	female	single	good	normal weight	higher education	3 meal	yes, sometimes	habit fr an	yes, most	chili pep	tea & coff	good feel	raw beef	beef	my traditi	nothing	only holy	launch	Not Dependent	no	unsafe	sufficient	in dilemma	may be	easy	good to health	good intension	strong agree	agree	strong disagree	strong disagree	strong agree	strong agree	strong agree	Good Perception
Dessie	36-50	female	married	good	normal weight	higher education	3 meal	yes, sometimes	I don't re	yes, som	mixture	alcohol	incr meta	raw beef	beef	cheers me	nothing	only holy	breakfast	Not Dependent	yes, my personal decision	unsafe	sufficient	in dilemma	may be	unsure	I didn't believe	good intension	strong agree	agree	strong disagree	strong disagree	strong agree	strong agree	strong agree	Good Perception
Dessie	18-35	male	single	good	normal weight	higher education	3 meal	yes, always	habit fr an	yes, som	mixture	alcohol	good feel	heated	beef	cheers me	nothing	only holy	breakfast	Not Dependent	no	neutral	good	moderate interested	may be	easy	good to health	good intension	agree	strong agree	agree	agree	strong agree	agree	agree	Bad Perception
Dessie	36-50	male	married	good	normal weight	primary school	3 meal	no	peer pres	yes, som	chili pep	tea & coff	incr meta	heated	beef	cheers me	hunger	1-3t month	launch	Not Dependent	yes, my personal decision	neutral	sufficient	moderate interested	need time	not easy	addicted	good intension	agree	neutral	agree	agree	neutral	agree	neutral	Bad Perception
Dessie	18-35	female	married	very good	normal weight	secondary school	2 meal	yes, sometimes	intentional	yes, som	mixture	tea & coff	incr meta	raw beef	beef	keeps me	hunger	few time we	launch	Dependent	yes, my personal decision	unsafe	sufficient	highly interested	need time	not easy	no alternative	good intension	neutral	disagree	neutral	disagree	agree	strong agree	neutral	Bad Perception
Dessie	36-50	male	married	good	normal weight	higher education	2 meal	yes, always	peer pres	yes, most	chili pep	alcohol	good feel	raw beef	beef	cheers me	uncomfor	once a week	breakfast	Dependent	no	unsafe	sufficient	not interested	never	not easy	addicted	good intension	strong agree	strong agree	disagree	strong disagree	strong agree	neutral	strong agree	Good Perception
Dessie	>50	male	married	good	over weight	secondary school	3 meal	yes, always	habit fr an	yes, most	mixture	alcohol	no reason	heated	mutton	cheers me	nothing	few time we	all meals	Not Dependent	yes, my personal decision	unsafe	sufficient	moderate interested	immediately stop	very easy	good to health	good intension	strong agree	strong agree	strong disagree	strong disagree	strong agree	neutral	strong agree	Good Perception
Dessie	36-50	male	married	good	normal weight	secondary school	3 meal	yes, sometimes	intentional	yes, som	chili pep	alcohol	incr meta	heated	mutton	high nutr	nothing	only holy	launch	Not Dependent	no	unsafe	insufficient	moderate interested	may be	easy	no alternative	good intension	agree	neutral	strong disagree	disagree	agree	neutral	strong agree	Good Perception
Dessie	18-35	male	single	good	normal weight	secondary school	2 meal	no	intentional	yes, som	mixture	alcohol	incr meta	heated	beef	high nutr	nothing	once a day	launch	Not Dependent	no	unsafe	good	not interested	may be	easy	no alternative	good intension	agree	disagree	agree	disagree	agree	neutral	disagree	Bad Perception
Dessie	18-35	female	married	good	normal weight	primary school	3 meal	yes, sometimes	intentional	yes, som	chili pep	other	incr meta	raw beef	beef	easy to prepare	nothing	once a day	launch	Not Dependent	no	safe	insufficient	not interested	may be	very easy	I didn't believe	good intension	strong agree	agree	neutral	disagree	strong agree	agree	agree	Good Perception
Dessie	18-35	male	single	good	normal weight	primary school	2 meal	no	I don't re	yes, som	chili pep	other	no reason	heated	beef	cheep	uncomfor	once a week	launch	Not Dependent	no	safe	insufficient	moderate interested	immediately stop	easy	addicted	good intension	strong agree	agree	agree	disagree	agree	agree	agree	Bad Perception
Dessie	36-50	male	married	good	normal weight	higher education	3 meal	yes, sometimes	intentional	yes, som	chili pep	alcohol	incr meta	heated	beef	cheers me	nothing	few time day	breakfast	Not Dependent	yes, my personal decision	safe	sufficient	highly interested	need time	unsure	addicted	good intension	strong agree	agree	strong agree	neutral	agree	agree	disagree	Bad Perception
Dessie	18-35	female	single	good	normal weight	secondary school	2 meal	no	I don't re	yes, most	chili pep	other	incr meta	heated	beef	easy to prepare	nothing	only holy	launch	Not Dependent	yes, my personal decision	safe	insufficient	in dilemma	may be	very easy	good to health	good intension	disagree	neutral	agree	agree	strong agree	agree	disagree	Bad Perception
Dessie	18-35	male	single	good	normal weight	higher education	3 meal	no	peer pres	yes, som	mixture	alcohol	my habit	heated	beef	cheers me	nothing	only holy	launch	Not Dependent	no	I don't know	insufficient	moderate interested	need time	easy	I didn't believe	good intension	strong agree	agree	strong agree	agree	strong agree	agree	strong agree	Bad Perception
Dessie	36-50	male	married	very good	normal weight	secondary school	3 meal	yes, always	I don't re	yes, most	mixture	alcohol	good feel	raw beef	beef	my traditi	nothing	1-3t month	launch	Not Dependent	no	safe	sufficient	not interested	never	not easy	addicted	bad intension	disagree	neutral	agree	agree	neutral	disagree	disagree	Bad Perception
Dessie	18-35	male	single	very good	normal weight	higher education	3 meal	yes, sometimes	intentional	yes, som	mixture	alcohol	incr meta	heated	mutton	high nutr	nothing	only holy	launch	Not Dependent	no	unsafe	insufficient	moderate interested	may be	very easy	I didn't believe	good intension	agree	agree	strong agree	neutral	strong agree	neutral	agree	Bad Perception
Dessie	18-35	male	single	good	normal weight	higher education	3 meal	yes, sometimes	I don't re	yes, som	mixture	alcohol	no reason	heated	beef	high nutr	nothing	only holy	launch	Not Dependent	yes, my personal decision	neutral	very good	strongly not interested	may be	unsure	good to health	good intension	strong agree	strong disagree	strong agree	strong agree	strong agree	disagree	agree	Bad Perception
Dessie	18-35	male	single	excellent	normal weight	higher education	2 meal	yes, sometimes	I don't re	yes, most	chili pep	alcohol	good feel	heated	beef	cheers me	nothing	once a week	breakfast	Not Dependent	no	unsafe	sufficient	highly interested	immediately stop	easy	good to health	good intension	disagree	disagree	agree	disagree	agree	agree	agree	Bad Perception
Dessie	18-35	male	single	very good	normal weight	higher education	3 meal	yes, sometimes	peer pres	yes, most	pepper	tea & coff	good feel	heated	mutton	cheers me	nothing	1-3t month	launch	Not Dependent	no	neutral	sufficient	moderate interested	may be	easy	I didn't believe	good intension	neutral	disagree	strong disagree	neutral	agree	agree	neutral	Bad Perception
Dessie	18-35	female	single	excellent	normal weight	higher education	3 meal	yes, sometimes	I don't re	yes, som	pepper	tea & coff	my habit	heated	beef	cheers me	nothing	1-3t month	launch	Not Dependent	yes, advice by doctor	unsafe	sufficient	moderate interested	immediately stop	very easy	I didn't believe	good intension	neutral	neutral	strong disagree	neutral	strong agree	strong agree	agree	Good Perception
Dessie	18-35	female	single	good	normal weight	primary school	3 meal	yes, sometimes	intentional	yes, som	chili pep	other	incr meta	heated	beef	cheers me	nothing	few time day	all meals	Not Dependent	no	safe	insufficient	moderate interested	immediately stop	easy	good to health	good intension	agree	agree	strong agree	disagree	agree	neutral	neutral	Bad Perception
Dessie	36-50	male	single	good	normal weight	primary school	3 meal	yes, always	intentional	yes, most	chili pep	alcohol	good feel	raw beef	beef	cheers me	nothing	few time we	launch	Dependent	no	safe	sufficient	moderate interested	immediately stop	easy	I didn't believe	good intension	strong agree	neutral	strong disagree	strong disagree	strong agree	strong agree	strong agree	Good Perception
Dessie	18-35	male	single	good	normal weight	secondary school	3 meal	yes, always	habit fr an	yes, most	chili pep	alcohol	incr meta	raw beef	beef	cheers me	uncomfor	few time we	breakfast	Not Dependent	no	safe	insufficient	in dilemma	immediately stop	unsure	I didn't believe	good intension	disagree	disagree	strong agree	strong agree	strong disagree	neutral	strong agree	Bad Perception
Dessie	36-50	male	single	good	normal weight	secondary school	3 meal	yes, sometimes	habit fr an	yes, most	chili pep	other	my habit	raw beef	beef	cheers me	nothing	few time we	launch	Dependent	no	safe	sufficient	in dilemma	immediately stop	easy	I didn't believe	good intension	neutral	strong disagree	strong agree	strong agree	strong agree	neutral	strong disagree	Bad Perception
Dessie	18-35	female	single	good	normal weight	secondary school	3 meal	yes, sometimes	I don't re	yes, som	mixture	other	good feel	heated	beef	my traditi	nothing	only holy	launch	Not Dependent	no	neutral	insufficient	not interested	may be	easy	good to health	good intension	strong agree	disagree	agree	strong disagree	agree	neutral	agree	Bad Perception
Dessie	18-35	male	single	good	normal weight	higher education	3 meal	yes, sometimes	I don't re	yes, som	pepper	other	incr meta	heated	beef	cheers me	nothing	only holy	launch	Not Dependent	no	safe	sufficient	highly interested	immediately stop	very easy	good to health	good intension	strong agree	disagree	agree	agree	strong agree	neutral	strong disagree	Bad Perception
Dessie	36-50	male	married	very good	normal weight	secondary school	2 meal	yes, sometimes	habit fr an	yes, som	pepper	tea & coff	good feel	raw beef	mutton	easy to prepare	nothing	1-3t month	breakfast	Not Dependent	no	unsafe	sufficient	not interested	may be	easy	good to health	good intension	disagree	strong disagree	disagree	disagree	strong disagree	agree	disagree	Bad Perception
Dessie	18-35	male	single	excellent	normal weight	higher education	3 meal	yes, sometimes	habit fr an	yes, som	mixture	alcohol	my habit	heated	beef	cheep	nothing	only holy	breakfast	Not Dependent	no	safe	good	not interested	may be	easy	good to health	good intension	disagree	neutral	disagree	disagree	neutral	disagree	neutral	Bad Perception
Dessie	18-35	male	single	poor	under weight	primary school	2 meal	yes, sometimes	habit fr an	yes, som	pepper	alcohol	incr meta	raw beef	mutton	cheers me	nothing	once a week	breakfast	Not Dependent	yes, advice by doctor	neutral	good	highly interested	immediately stop	very easy	good to health	good intension	disagree	disagree	strong agree	neutral	disagree	disagree	disagree	Bad Perception
Dessie	36-50	male	married	good	normal weight	higher education	3 meal	yes, always	peer pres	yes, most	mixture	alcohol	incr meta	raw beef	beef	cheers me	hunger	1-3t month	launch	Dependent	no	safe	insufficient	not interested	never	impossible	addicted	bad intension	disagree	disagree	disagree	agree	agree	neutral	strong disagree	Bad Perception
Dessie	18-35	male	single	very good	normal weight	secondary school	3 meal	no	peer pres	yes, most	mixture	alcohol	incr meta	raw beef	beef	cheers me	uncomfor	1-3t month	launch	Dependent	no	safe	sufficient	in dilemma	never	not easy	addicted	bad intension	agree	neutral	disagree	agree	agree	neutral	disagree	Bad Perception
Dessie	18-35	male	married	good	normal weight	higher education	3 meal	yes, sometimes	I don't re	yes, som	chili pep	tea & coff	my habit	heated	beef	cheers me	nothing	few time we	launch	Not Dependent	no	unsafe	sufficient	moderate interested	may be	easy	good to health	good intension	agree	disagree	disagree	disagree	agree	neutral	disagree	Bad Perception
Dessie	18-35	female	single	good	normal weight	secondary school	4 meal	no	intentional	yes, most	mixture	alcohol	good feel	heated	beef	keeps me	nothing	once a day	breakfast	Not Dependent	yes, my personal decision	I don't know	sufficient	not interested	immediately stop	very easy	good to health	good intension	agree	disagree	agree	disagree	strong agree	disagree	strong disagree	Bad Perception
Dessie	18-35	male	single	very good	normal weight	higher education	3 meal	no	peer pres	yes, most	chili pep	alcohol	incr meta	raw beef	beef	cheers me	hunger	1-3t month	launch	Dependent	no	safe	sufficient	in dilemma	never	impossible	addicted	bad intension	agree	disagree	disagree	disagree	agree	neutral	neutral	Bad Perception
Dessie	36-50	male	married	very good	normal weight	higher education	3 meal	yes, always	intentional	yes, most	mixture	other	incr meta	heated	beef	high nutr	uncomfor	few time day	all meals	Not Dependent	no	safe	insufficient	not interested	need time	unsure	no alternative	bad intension	agree	neutral	neutral	agree	strong agree	neutral	agree	Good Perception
Dessie	>50	male	single	good	normal weight	higher education	3 meal	yes, always	habit fr an	yes, som	chili pep	alcohol	incr meta	heated	beef	my traditi	nothing	only holy	launch	Not Dependent	yes, my personal decision	safe	sufficient	moderate interested	immediately stop	easy	good to health	good intension	agree	neutral	neutral	disagree	agree	neutral	disagree	Bad Perception
Dessie	36-50	female	married	good	normal weight	secondary school	3 meal	yes, sometimes	intentional	yes, som	chili pep	tea & coff	my habit	heated	beef	my traditi	nothing	few time day	launch	Not Dependent	no	neutral	sufficient	moderate interested	immediately stop	easy	good to health	good intension	agree	disagree	disagree	disagree	agree	disagree	agree	Bad Perception
Dessie	36-50	male	single	very good	normal weight	higher education	2 meal	no	peer pres	yes, most	mixture	other	incr meta	heated	beef	cheers me	nothing	few time we	launch	Not Dependent	yes, my personal decision	I don't know	sufficient	in dilemma	need time	unsure	I didn't believe	good intension	agree	disagree	disagree	strong disagree	agree	neutral	disagree	Bad Perception
Dessie	18-35	female	single	good	normal weight	secondary school	3 meal	yes, sometimes	intentional	yes, som	chili pep	other	good feel	heated	beef	high nutr	nothing	once a week	launch	Not Dependent	no	unsafe	sufficient	not interested	may be	unsure	no alternative	good intension	agree	disagree	disagree	disagree	agree	neutral	disagree	Bad Perception
Dessie	18-35	male	married	good	normal weight	higher education	3 meal	yes, always	I don't re	yes, som	mixture	tea & coff	my habit	heated	beef	cheers me	nothing	once a day	launch	Not Dependent	yes, my personal decision	unsafe	insufficient	moderate interested	immediately stop	easy	good to health	good intension	agree	disagree	neutral	disagree	agree	neutral	disagree	Bad Perception
Dessie	>50	female	widow	good	obese	primary school	4 meal	yes, always	I don't re	yes, som	mixture	alcohol	no reason	raw beef	beef	high nutr	nothing	once a day	all meals	Dependent	yes, advice by doctor	I don't know	insufficient	in dilemma	may be	unsure	I didn't believe	bad intension	disagree	strong disagree	neutral	disagree	strong agree	neutral	disagree	Bad Perception
Dessie	36-50	male	married	good	normal weight	higher education	3 meal	yes, always	habit fr an	yes, som	mixture	alcohol	incr meta	heated	beef	cheers me	nothing	few time we	launch	Not Dependent	no	safe	good	highly interested	immediately stop	very easy	I didn't believe	good intension	agree	disagree	strong agree	disagree	agree	disagree	strong disagree	Bad Perception
Dessie	18-35	male	widow	very good	normal weight	secondary school	3 meal	yes, sometimes	intentional	yes, most	mixture	alcohol	incr meta	raw beef	beef	cheers me	hunger	1-3t month	launch	Dependent	no	safe	insufficient	not interested	never	not easy	addicted	bad intension	disagree	strong disagree	agree	agree	agree	disagree	disagree	Bad Perception
Dessie	36-50	female	married	good	normal weight	higher education	3 meal	yes, always	intentional	yes, most	chili pep	other	my habit	heated	beef	easy to prepare	nothing	only holy	launch	Not Dependent	no	I don't know	insufficient	moderate interested	may be	easy	good to health	good intension	disagree	strong disagree	agree	disagree	strong agree	strong disagree	disagree	Bad Perception
Dessie	36-50	male	single	good	obese	higher education	3 meal	yes, always	habit fr an	yes, most	mixture	other	my habit	heated	beef	my traditi	nothing	1-3t month	launch	Not Dependent	yes, my personal decision	safe	insufficient	highly interested	immediately stop	easy	good to health	good intension	disagree	strong disagree	agree	disagree	agree	neutral	disagree	Bad Perception
Dessie	36-50	male	single	very good	normal weight	primary school	2 meal	no	intentional	yes, som	mixture	alcohol	incr meta	raw beef	beef	keeps me	uncomfor	once a day	launch	Dependent	no	safe	insufficient	strongly not interested	never	impossible	addicted	bad intension	strong disagree	disagree	agree	strong agree	agree	disagree	strong disagree	Bad Perception
Dessie	36-50	female	married	good	normal weight	secondary school	3 meal	yes, sometimes	I don't re	yes, som	mixture	tea & coff	my habit	raw beef	beef	my traditi	nothing	once a week	launch	Dependent	no	unsafe	sufficient	moderate interested	may be	easy	good to health	good intension	disagree	strong disagree	agree	disagree	agree	disagree	strong disagree	Bad Perception
Dessie	18-35	female	single	good	normal weight	secondary school	3 meal	no	intentional	yes, most	mixture	alcohol	incr meta	heated	beef	keeps me	nothing	once a day	launch	Not Dependent	yes, my personal decision	unsafe	sufficient	in dilemma	need time	unsure	no alternative	good intension	disagree	strong disagree	agree	strong disagree	strong agree	disagree	strong disagree	Bad Perception
Dessie	18-35	male	single	very good	normal weight	higher education	3 meal	yes, sometimes	intentional	yes, most	mixture	alcohol	incr meta	heated	beef	cheers me	nothing	once a day	breakfast	Not Dependent	no	safe	insufficient	moderate interested	may be	easy	good to health	good intension	agree	disagree	agree	disagree	agree	neutral	disagree	Bad Perception
Dessie	36-50	male	married	good	normal weight	secondary school	3 meal	yes, always	peer pres	yes, som	chili pep	other	my habit	raw beef	beef	keeps me	uncomfor	1-3t month	launch	Dependent	yes, my personal decision	safe	sufficient	not interested	may be	unsure	no alternative	good intension	disagree	strong disagree	agree	agree	strong agree	neutral	disagree	Bad Perception
Dessie	18-35	male	single	very good	normal weight	secondary school	3 meal	yes, always	intentional	yes, most	mixture	alcohol	incr meta	raw beef	beef	cheers me	uncomfor	once a day	launch	Dependent	no	safe	insufficient	in dilemma	never	not easy	addicted	bad intension	agree	disagree	disagree	disagree	agree	disagree	agree	Bad Perception
Dessie	18-35	female	single	very good	normal weight	higher education	3 meal	yes, sometimes	habit fr an	yes, som	mixture	tea & coff	my habit	heated	beef	high nutr	nothing	few time we	launch	Not Dependent	no	safe	sufficient	highly interested	immediately stop	easy	good to health	good intension	agree	disagree	agree	disagree	strong agree	disagree	strong disagree	Bad Perception
Dessie	36-50	female	married	good	normal weight	higher education	3 meal	yes, always	habit fr an	yes, som	chili pep	other	my habit	heated	beef	my traditi	nothing	only holy	all meals	Not Dependent	no	I don't know	good	moderate interested	may be	easy	good to health	good intension	disagree	disagree	disagree	strong disagree	agree	neutral	disagree	Bad Perception
Dessie	>50	male	single	good	normal weight	higher education	3 meal	yes, always	habit fr an	yes, som	mixture	alcohol	incr meta	heated	beef	my traditi	nothing	once a week	launch	Not Dependent	no	safe	sufficient	moderate interested	immediately stop	easy	good to health	good intension	disagree	strong disagree	agree	agree	agree	disagree	disagree	Bad Perception
Dessie	36-50	male	married	good	obese	higher education	3 meal	yes, always	I don't re	yes, most	mixture	tea & coff	good feel	raw beef	beef	cheers me	hunger	few time day	launch	Dependent	no	neutral	sufficient	not interested	may be	not easy	no alternative	bad intension	agree	disagree	agree	disagree	agree	neutral	agree	Bad Perception
Dessie	36-50	female	married	good	normal weight	higher education	3 meal	yes, always	intentional	yes, som	chili pep	tea & coff	my habit	heated	beef	high nutr	nothing	only holy	launch	Not Dependent	no	neutral	insufficient	not interested	may be	easy	good to health	good intension	disagree	strong disagree	agree	disagree	agree	disagree	strong disagree	Bad Perception
Dessie	18-35	female	single	good	normal weight	secondary school	3 meal	no	peer pres	yes, most	mixture	alcohol	incr meta	heated	beef	keeps me	nothing	once a day	launch	Not Dependent	no	unsafe	insufficient	not interested	may be	easy	no alternative	good intension	disagree	strong disagree	disagree	disagree	agree	disagree	disagree	Bad Perception
Dessie	18-35	male	single	very good	normal weight	primary school	3 meal	yes, always	intentional	yes, most	mixture	tea & coff	my habit	heated	beef	cheers me	nothing	only holy	breakfast	Not Dependent	no	safe	insufficient	moderate interested	may be	easy	good to health	good intension	agree	disagree	agree	strong disagree	strong agree	disagree	agree	Bad Perception
kombolcha	36-50	male	married	good	normal weight	higher education	3 meal	yes, sometimes	I don't re	yes, som	chili pep	other	good feel	heated	mutton	high nutr	nothing	few time we	launch	Not Dependent	no	unsafe	insufficient	highly interested	may be	easy	I didn't believe	good intension	disagree	strong disagree	disagree	agree	strong agree	neutral	agree	Bad Perception
kombolcha	18-35	male	single	good	normal weight	primary school	3 meal	no	peer pres	yes, most	mixture	tea & coff	my habit	heated	beef	easy to prepare	nothing	only holy	all meals	Not Dependent	no	I don't know	sufficient	not interested	immediately stop	very easy	good to health	good intension	agree	disagree	agree	disagree	agree	disagree	agree	Bad Perception
kombolcha	36-50	male	married	good	normal weight	higher education	2 meal	yes, sometimes	intentional	yes, som	chili pep	alcohol	incr meta	raw beef	beef	high nutr	hunger	once a week	launch	Dependent	no	I don't know	insufficient	highly interested	need time	unsure	I didn't believe	good intension	disagree	disagree	agree	agree	strong agree	disagree	strong disagree	Bad Perception
kombolcha	36-50	male	single	good	normal weight	secondary school	2 meal	yes, sometimes	intentional	yes, som	chili pep	alcohol	kill micro	heated	beef	my traditi	nothing	once a day	dinner	Not Dependent	no	neutral	insufficient	moderate interested	may be	not easy	addicted	good intension	strong disagree	agree	disagree	neutral	strong disagree	neutral	strong agree	Bad Perception
kombolcha	18-35	female	single	poor	normal weight	higher education	2 meal	no	intentional	yes, som	mixture	alcohol	good feel	heated	beef	my traditi	nothing	1-3t month	launch	Not Dependent	yes, advice by doctor	unsafe	insufficient	highly interested	immediately stop	easy	no alternative	good intension	strong agree	agree	agree	neutral	strong agree	strong agree	strong agree	Bad Perception
kombolcha	18-35	female	single	very good	normal weight	higher education	3 meal	yes, sometimes	I don't re	yes, som	chili pep	tea & coff	good feel	heated	mutton	my traditi	nothing	only holy	breakfast	Not Dependent	no	I don't know	sufficient	not interested	never	unsure	addicted	bad intension	strong agree	agree	neutral	agree	strong agree	neutral	agree	Good Perception
kombolcha	18-35	female	single	poor	normal weight	higher education	3 meal	no	I don't re	yes, som	mixture	tea & coff	my habit	heated	beef	easy to prepare	nothing	few time we	launch	Not Dependent	yes, my personal decision	unsafe	good	highly interested	immediately stop	easy	I didn't believe	good intension	strong disagree	neutral	disagree	strong disagree	strong agree	agree	strong agree	Bad Perception
kombolcha	18-35	male	single	good	normal weight	secondary school	3 meal	yes, sometimes	I don't re	yes, most	mixture	alcohol	incr meta	heated	beef	cheers me	nothing	once a day	launch	Not Dependent	no	unsafe	insufficient	moderate interested	may be	easy	good to health	good intension	agree	disagree	agree	disagree	agree	neutral	disagree	Bad Perception
kombolcha	36-50	female	married	good	normal weight	secondary school	3 meal	yes, sometimes	I don't re	yes, som	chili pep	tea & coff	my habit	heated	beef	high nutr	nothing	once a day	breakfast	Not Dependent	yes, my personal decision	neutral	good	in dilemma	immediately stop	very easy	good to health	good intension	disagree	strong disagree	disagree	strong disagree	agree	disagree	strong disagree	Bad Perception
kombolcha	>50	male	single	good	normal weight	higher education	3 meal	yes, always	habit fr an	yes, most	mixture	alcohol	incr meta	heated	beef	my traditi	nothing	once a week	launch	Not Dependent	no	unsafe	sufficient	moderate interested	may be	easy	good to health	good intension	disagree	disagree	agree	disagree	strong agree	neutral	disagree	Bad Perception
kombolcha	18-35	male	married	very good	normal weight	primary school	2 meal	no	peer pres	yes, most	chili pep	alcohol	incr meta	raw beef	beef	cheers me	hunger	once a day	launch	Dependent	no	safe	sufficient	not interested	need time	unsure	no alternative	bad intension	agree	disagree	agree	disagree	agree	neutral	disagree	Bad Perception
kombolcha	18-35	female	single	good	normal weight	secondary school	3 meal	yes, sometimes	I don't re	yes, som	pepper	other	good feel	heated	beef	cheep	nothing	few time day	launch	Not Dependent	no	I don't know	insufficient	highly interested	may be	very easy	good to health	good intension	agree	disagree	agree	disagree	agree	disagree	agree	Bad Perception
kombolcha	36-50	male	married	very good	obese	higher education	3 meal	yes, always	habit fr an	yes, som	mixture	tea & coff	my habit	heated	beef	my traditi	nothing	once a day	launch	Not Dependent	no	safe	sufficient	moderate interested	may be	easy	good to health	good intension	disagree	strong disagree	agree	disagree	strong agree	neutral	disagree	Bad Perception
kombolcha	36-50	female	single	good	normal weight	secondary school	2 meal	yes, sometimes	I don't re	yes, most	chili pep	other	incr meta	heated	beef	keeps me	nothing	only holy	all meals	Not Dependent	yes, my personal decision	neutral	insufficient	highly interested	immediately stop	easy	good to health	good intension	disagree	strong disagree	agree	disagree	strong agree	disagree	disagree	Bad Perception
kombolcha	18-35	male	single	poor	normal weight	primary school	3 meal	no	peer pres	yes, som	mixture	tea & coff	my habit	heated	beef	high nutr	nothing	few time we	launch	Not Dependent	no	safe	insufficient	not interested	may be	easy	I didn't believe	good intension	disagree	strong disagree	agree	disagree	strong agree	neutral	disagree	Bad Perception
kombolcha	>50	male	married	good	normal weight	higher education	3 meal	yes, always	habit fr an	yes, som	chili pep	tea & coff	my habit	heated	mutton	my traditi	nothing	once a day	launch	Not Dependent	no	safe	sufficient	highly interested	immediately stop	easy	good to health	good intension	disagree	disagree	agree	disagree	agree	neutral	disagree	Bad Perception
kombolcha	18-35	male	single	good	normal weight	higher education	4 meal	yes, sometimes	habit fr an	yes, most	mixture	other	incr meta	heated	beef	cheers me	nothing	1-3t month	launch	Not Dependent	yes, my personal decision	unsafe	sufficient	highly interested	immediately stop	easy	good to health	good intension	strong agree	strong disagree	disagree	agree	strong agree	neutral	agree	Bad Perception
kombolcha	18-35	male	single	good	normal weight	higher education	3 meal	yes, sometimes	habit fr an	yes, som	chili pep	alcohol	good feel	raw beef	beef	cheers me	uncomfor	only holy	launch	Not Dependent	no	safe	good	highly interested	may be	unsure	addicted	good intension	disagree	disagree	agree	agree	strong agree	agree	strong agree	Bad Perception
kombolcha	18-35	male	single	good	normal weight	higher education	3 meal	yes, sometimes	habit fr an	yes, som	chili pep	alcohol	incr meta	raw beef	beef	high nutr	uncomfor	once a week	launch	Dependent	no	safe	good	highly interested	may be	unsure	I didn't believe	good intension	disagree	disagree	agree	strong agree	strong agree	agree	agree	Bad Perception
kombolcha	18-35	male	single	good	normal weight	secondary school	3 meal	yes, sometimes	peer pres	yes, som	chili pep	tea & coff	my habit	heated	beef	cheers me	nothing	once a day	launch	Not Dependent	no	unsafe	sufficient	moderate interested	may be	easy	good to health	good intension	agree	disagree	disagree	disagree	agree	disagree	agree	Bad Perception
kombolcha	18-35	female	married	good	normal weight	higher education	2 meal	yes, always	habit fr an	yes, most	mixture	other	incr meta	raw beef	beef	my traditi	nothing	1-3t month	launch	Not Dependent	yes, my personal decision	neutral	insufficient	highly interested	immediately stop	very easy	good to health	good intension	agree	strong agree	disagree	strong disagree	agree	neutral	disagree	Bad Perception
kombolcha	18-35	female	single	very good	normal weight	secondary school	4 meal	yes, sometimes	I don't re	yes, som	pepper	alcohol	incr meta	heated	beef	high nutr	nothing	few time we	launch	Not Dependent	no	safe	sufficient	not interested	never	unsure	addicted	bad intension	disagree	disagree	agree	agree	strong agree	neutral	disagree	Bad Perception
kombolcha	36-50	male	married	very good	over weight	higher education	3 meal	yes, always	peer pres	yes, most	mixture	alcohol	incr meta	raw beef	beef	cheers me	uncomfor	once a week	launch	Dependent	no	safe	sufficient	not interested	never	impossible	addicted	bad intension	strong disagree	strong disagree	disagree	agree	strong agree	disagree	strong disagree	Bad Perception
kombolcha	36-50	female	married	good	normal weight	secondary school	2 meal	yes, sometimes	intentional	yes, som	pepper	tea & coff	my habit	heated	beef	cheep	nothing	few time day	launch	Not Dependent	no	I don't know	sufficient	highly interested	immediately stop	easy	good to health	good intension	agree	disagree	agree	disagree	agree	neutral	disagree	Bad Perception
kombolcha	18-35	male	married	excellent	normal weight	higher education	3 meal	no	peer pres	yes, most	mixture	alcohol	incr meta	raw beef	beef	high nutr	hunger	1-3t month	launch	Dependent	no	neutral	insufficient	in dilemma	need time	not easy	addicted	bad intension	disagree	strong disagree	disagree	disagree	agree	neutral	disagree	Bad Perception
kombolcha	18-35	female	married	good	normal weight	secondary school	3 meal	yes, always	I don't re	yes, som	chili pep	tea & coff	good feel	heated	beef	my traditi	nothing	once a day	launch	Not Dependent	yes, my personal decision	safe	sufficient	moderate interested	immediately stop	easy	I didn't believe	good intension	agree	disagree	strong disagree	disagree	strong agree	disagree	agree	Bad Perception
kombolcha	>50	male	married	good	normal weight	higher education	3 meal	yes, always	habit fr an	yes, som	chili pep	alcohol	incr meta	heated	beef	my traditi	nothing	only holy	launch	Not Dependent	yes, my personal decision	safe	sufficient	highly interested	immediately stop	easy	good to health	good intension	agree	disagree	disagree	disagree	agree	agree	disagree	Bad Perception
kombolcha	18-35	male	widow	good	normal weight	secondary school	3 meal	no	I don't re	yes, most	mixture	alcohol	incr meta	raw beef	beef	cheers me	nothing	1-3t month	launch	Dependent	no	safe	insufficient	not interested	may be	unsure	addicted	bad intension	disagree	disagree	disagree	agree	agree	disagree	disagree	Bad Perception
kombolcha	18-35	male	single	good	normal weight	higher education	3 meal	yes, sometimes	intentional	yes, som	chili pep	other	my habit	raw beef	beef	high nutr	nothing	few time we	launch	Dependent	no	unsafe	insufficient	highly interested	immediately stop	easy	good to health	good intension	agree	disagree	disagree	disagree	agree	neutral	disagree	Bad Perception
kombolcha	18-35	male	single	good	normal weight	higher education	4 meal	yes, always	habit fr an	yes, som	pepper	other	no reason	heated	beef	my traditi	nothing	only holy	dinner	Not Dependent	yes, my personal decision	I don't know	insufficient	moderate interested	may be	unsure	I didn't believe	good intension	agree	neutral	disagree	agree	agree	neutral	agree	Good Perception
kombolcha	18-35	male	single	good	normal weight	higher education	2 meal	yes, sometimes	habit fr an	yes, som	chili pep	alcohol	incr meta	heated	beef	easy to prepare	nothing	few time we	launch	Not Dependent	yes, my personal decision	neutral	good	in dilemma	may be	easy	good to health	good intension	agree	neutral	disagree	agree	agree	neutral	agree	Good Perception
kombolcha	18-35	male	single	good	normal weight	higher education	2 meal	yes, always	habit fr an	yes, som	mixture	alcohol	good feel	heated	mutton	high nutr	uncomfor	few time day	launch	Not Dependent	yes, my personal decision	safe	good	highly interested	need time	not easy	addicted	good intension	strong agree	agree	disagree	strong disagree	strong agree	strong agree	strong agree	Good Perception
kombolcha	18-35	female	single	excellent	normal weight	higher education	3 meal	yes, always	intentional	yes, most	mixture	other	good feel	heated	mutton	high nutr	nothing	once a week	breakfast	Not Dependent	yes, my personal decision	unsafe	sufficient	not interested	immediately stop	very easy	I didn't believe	good intension	strong agree	agree	strong disagree	strong agree	strong agree	neutral	strong agree	Good Perception
kombolcha	18-35	female	single	good	normal weight	higher education	3 meal	yes, sometimes	peer pres	yes, som	mixture	tea & coff	good feel	raw beef	beef	easy to prepare	hunger	only holy	launch	Not Dependent	no	safe	insufficient	moderate interested	may be	unsure	good to health	good intension	agree	disagree	agree	disagree	agree	neutral	disagree	Bad Perception
kombolcha	18-35	male	single	excellent	normal weight	higher education	1 meal	no	peer pres	yes, som	pepper	alcohol	incr meta	raw beef	beef	easy to prepare	nothing	few time we	launch	Dependent	yes, my personal decision	unsafe	good	in dilemma	may be	easy	no alternative	good intension	agree	neutral	neutral	agree	strong agree	agree	agree	Good Perception
kombolcha	18-35	male	single	poor	normal weight	higher education	3 meal	yes, sometimes	habit fr an	yes, som	mixture	physical ex	no reason	heated	beef	cheers me	nothing	once a day	dinner	Not Dependent	yes, my personal decision	unsafe	insufficient	moderate interested	may be	unsure	addicted	good intension	neutral	agree	agree	disagree	neutral	agree	strong agree	Bad Perception
kombolcha	18-35	male	single	very good	normal weight	higher education	3 meal	yes, always	I don't re	yes, som	pepper	tea & coff	my habit	heated	beef	easy to prepare	nothing	only holy	launch	Not Dependent	yes, my personal decision	unsafe	good	highly interested	may be	easy	good to health	good intension	agree	neutral	agree	disagree	strong agree	agree	agree	Bad Perception
kombolcha	36-50	male	married	very good	normal weight	secondary school	3 meal	yes, always	I don't re	yes, most	mixture	alcohol	incr meta	raw beef	beef	cheers me	nothing	only holy	launch	Not Dependent	yes, my personal decision	safe	sufficient	moderate interested	may be	easy	I didn't believe	good intension	disagree	strong disagree	agree	disagree	agree	disagree	strong disagree	Bad Perception
kombolcha	18-35	male	single	very good	normal weight	secondary school	3 meal	yes, sometimes	I don't re	yes, som	mixture	alcohol	incr meta	heated	beef	cheers me	nothing	once a day	launch	Not Dependent	no	safe	insufficient	moderate interested	may be	easy	good to health	good intension	disagree	strong disagree	agree	agree	strong agree	disagree	disagree	Bad Perception
kombolcha	18-35	female	single	good	normal weight	higher education	3 meal	no	peer pres	yes, som	mixture	other	my habit	heated	beef	my traditi	nothing	few time we	all meals	Not Dependent	no	neutral	sufficient	highly interested	may be	very easy	good to health	good intension	disagree	disagree	agree	disagree	agree	neutral	disagree	Bad Perception
kombolcha	36-50	male	married	very good	normal weight	secondary school	3 meal	yes, always	I don't re	yes, som	chili pep	tea & coff	good feel	heated	mutton	cheers me	nothing	1-3t month	launch	Not Dependent	yes, my personal decision	unsafe	insufficient	moderate interested	immediately stop	easy	good to health	good intension	disagree	disagree	agree	disagree	strong agree	disagree	strong disagree	Bad Perception
kombolcha	18-35	female	single	very good	normal weight	secondary school	2 meal	yes, sometimes	habit fr an	yes, som	pepper	tea & coff	no reason	raw beef	beef	cheers me	nothing	few time we	launch	Not Dependent	no	safe	sufficient	moderate interested	may be	unsure	I didn't believe	good intension	strong disagree	strong disagree	disagree	agree	neutral	strong disagree	neutral	Bad Perception
kombolcha	>50	male	married	good	normal weight	primary school	2 meal	no	habit fr an	yes, most	mixture	alcohol	good feel	raw beef	beef	keeps me	uncomfor	few time day	launch	Dependent	no	I don't know	sufficient	not interested	never	not easy	addicted	bad intension	strong disagree	strong disagree	neutral	strong agree	neutral	agree	neutral	Bad Perception
kombolcha	36-50	female	married	good	normal weight	secondary school	3 meal	yes, sometimes	habit fr an	yes, som	chili pep	other	my habit	heated	beef	keeps me	nothing	only holy	launch	Not Dependent	no	unsafe	good	moderate interested	need time	unsure	no alternative	good intension	agree	disagree	agree	disagree	agree	agree	agree	Bad Perception
kombolcha	18-35	male	single	good	normal weight	secondary school	3 meal	yes, sometimes	I don't re	yes, som	chili pep	other	good feel	heated	beef	cheers me	nothing	once a day	launch	Not Dependent	no	safe	sufficient	not interested	may be	easy	good to health	good intension	agree	disagree	disagree	disagree	agree	neutral	disagree	Bad Perception
kombolcha	18-35	female	married	very good	normal weight	higher education	2 meal	no	intentional	yes, most	pepper	tea & coff	my habit	heated	beef	high nutr	nothing	once a week	all meals	Not Dependent	yes, my personal decision	I don't know	sufficient	moderate interested	immediately stop	very easy	good to health	good intension	agree	disagree	disagree	disagree	strong agree	neutral	disagree	Bad Perception
kombolcha	18-35	female	single	good	normal weight	secondary school	3 meal	yes, sometimes	peer pres	yes, most	pepper	other	good feel	heated	beef	keeps me	nothing	few time we	launch	Not Dependent	no	unsafe	insufficient	highly interested	immediately stop	easy	good to health	good intension	agree	disagree	disagree	disagree	strong agree	neutral	disagree	Bad Perception
kombolcha	36-50	male	married	very good	normal weight	higher education	3 meal	yes, always	I don't re	yes, som	mixture	alcohol	incr meta	heated	beef	my traditi	uncomfor	once a day	launch	Not Dependent	yes, my personal decision	neutral	sufficient	not interested	need time	unsure	no alternative	good intension	agree	disagree	disagree	strong disagree	agree	neutral	disagree	Bad Perception
kombolcha	36-50	female	married	good	normal weight	secondary school	2 meal	yes, sometimes	habit fr an	yes, som	chili pep	other	incr meta	heated	beef	high nutr	nothing	once a week	dinner	Not Dependent	no	safe	insufficient	moderate interested	may be	unsure	I didn't believe	good intension	disagree	disagree	agree	disagree	strong agree	agree	disagree	Bad Perception
kombolcha	18-35	male	married	very good	normal weight	primary school	3 meal	no	I don't re	yes, som	chili pep	tea & coff	good feel	heated	beef	my traditi	nothing	few time we	launch	Not Dependent	no	neutral	good	in dilemma	never	impossible	addicted	bad intension	agree	disagree	disagree	disagree	agree	disagree	strong disagree	Bad Perception
kombolcha	18-35	male	single	good	normal weight	higher education	3 meal	yes, always	I don't re	yes, most	mixture	alcohol	incr meta	heated	beef	my traditi	nothing	once a day	launch	Not Dependent	yes, my personal decision	safe	sufficient	not interested	immediately stop	easy	good to health	good intension	disagree	disagree	disagree	neutral	agree	neutral	disagree	Bad Perception
kombolcha	36-50	female	married	good	normal weight	higher education	4 meal	yes, sometimes	intentional	yes, som	mixture	alcohol	incr meta	heated	beef	high nutr	nothing	few time day	launch	Not Dependent	yes, my personal decision	I don't know	insufficient	highly interested	immediately stop	easy	good to health	good intension	agree	disagree	agree	disagree	strong agree	disagree	strong disagree	Bad Perception
kombolcha	36-50	male	married	good	normal weight	secondary school	3 meal	yes, sometimes	I don't re	yes, most	pepper	tea & coff	my habit	heated	beef	my traditi	nothing	few time we	launch	Not Dependent	no	neutral	insufficient	moderate interested	may be	easy	good to health	good intension	agree	disagree	agree	disagree	strong agree	disagree	agree	Bad Perception
kombolcha	18-35	female	single	good	normal weight	higher education	3 meal	yes, always	habit fr an	yes, most	mixture	other	good feel	heated	beef	keeps me	nothing	1-3t month	launch	Not Dependent	yes, my personal decision	safe	insufficient	highly interested	immediately stop	very easy	no alternative	good intension	agree	disagree	agree	strong disagree	agree	neutral	disagree	Bad Perception
kombolcha	18-35	male	single	good	normal weight	secondary school	3 meal	yes, always	peer pres	yes, som	chili pep	alcohol	incr meta	raw beef	beef	cheers me	nothing	once a day	launch	Not Dependent	no	safe	sufficient	not interested	may be	easy	good to health	good intension	agree	disagree	disagree	strong disagree	agree	disagree	strong disagree	Bad Perception
kombolcha	18-35	female	single	very good	normal weight	higher education	3 meal	yes, sometimes	peer pres	yes, most	mixture	alcohol	incr meta	heated	beef	cheers me	nothing	once a day	launch	Not Dependent	no	unsafe	insufficient	in dilemma	immediately stop	very easy	good to health	good intension	strong agree	disagree	neutral	disagree	agree	neutral	strong disagree	Bad Perception
kombolcha	36-50	male	married	good	normal weight	higher education	3 meal	yes, always	intentional	yes, som	mixture	tea & coff	my habit	heated	beef	keeps me	nothing	few time we	breakfast	Not Dependent	yes, my personal decision	safe	insufficient	moderate interested	immediately stop	easy	good to health	good intension	agree	disagree	neutral	disagree	agree	neutral	disagree	Bad Perception
kombolcha	18-35	male	married	good	normal weight	secondary school	3 meal	yes, sometimes	I don't re	yes, som	chili pep	other	my habit	heated	mutton	cheers me	nothing	once a day	launch	Not Dependent	no	neutral	insufficient	moderate interested	immediately stop	easy	good to health	good intension	agree	disagree	neutral	strong disagree	strong agree	neutral	disagree	Bad Perception
kombolcha	18-35	male	single	very good	normal weight	higher education	4 meal	no	habit fr an	yes, som	chili pep	other	incr meta	raw beef	beef	keeps me	uncomfor	only holy	dinner	Not Dependent	no	unsafe	sufficient	highly interested	may be	not easy	addicted	good intension	disagree	strong disagree	agree	strong agree	agree	neutral	agree	Bad Perception
kombolcha	18-35	male	single	very good	normal weight	higher education	4 meal	yes, always	habit fr an	yes, som	mixture	other	no reason	raw beef	mutton	keeps me	nothing	few time we	all meals	Not Dependent	no	unsafe	insufficient	not interested	immediately stop	impossible	I didn't believe	good intension	disagree	disagree	strong disagree	disagree	agree	neutral	disagree	Bad Perception
kombolcha	18-35	male	single	very good	normal weight	higher education	2 meal	yes, sometimes	I don't re	yes, som	pepper	physical ex	good feel	heated	beef	easy to prepare	nothing	1-3t month	launch	Not Dependent	no	neutral	sufficient	highly interested	immediately stop	very easy	no alternative	good intension	disagree	agree	strong disagree	disagree	neutral	agree	agree	Bad Perception
kombolcha	36-50	male	married	very good	normal weight	secondary school	3 meal	yes, sometimes	peer pres	yes, som	mixture	alcohol	incr meta	raw beef	mutton	my traditi	nothing	only holy	all meals	Not Dependent	no	neutral	sufficient	not interested	need time	easy	I didn't believe	good intension	strong agree	agree	neutral	strong agree	agree	strong agree	agree	Good Perception
kombolcha	18-35	male	single	very good	normal weight	higher education	3 meal	yes, always	intentional	yes, som	chili pep	other	good feel	heated	beef	keeps me	nothing	1-3t month	launch	Not Dependent	yes, advice by doctor	safe	good	moderate interested	may be	very easy	no alternative	good intension	agree	agree	disagree	strong agree	strong agree	agree	agree	Good Perception
kombolcha	18-35	male	single	excellent	normal weight	higher education	1 meal	yes, sometimes	intentional	yes, som	chili pep	other	my habit	raw beef	mutton	high nutr	nothing	only holy	dinner	Not Dependent	no	safe	very good	not interested	never	impossible	I didn't believe	bad intension	strong disagree	strong disagree	neutral	strong agree	neutral	strong agree	agree	Bad Perception
kombolcha	36-50	female	single	good	normal weight	primary school	3 meal	yes, sometimes	intentional	yes, som	pepper	alcohol	incr meta	raw beef	mutton	my traditi	nothing	only holy	breakfast	Not Dependent	no	safe	sufficient	highly interested	may be	unsure	I didn't believe	good intension	disagree	disagree	agree	agree	agree	neutral	disagree	Bad Perception
kombolcha	18-35	male	single	very good	normal weight	higher education	3 meal	yes, sometimes	habit fr an	yes, som	mixture	alcohol	incr meta	raw beef	beef	high nutr	nothing	only holy	launch	Not Dependent	yes, my personal decision	safe	sufficient	moderate interested	may be	easy	good to health	good intension	disagree	disagree	agree	agree	strong agree	disagree	neutral	Bad Perception
kombolcha	18-35	male	married	very good	normal weight	higher education	3 meal	yes, always	habit fr an	yes, som	mixture	tea & coff	incr meta	heated	beef	my traditi	uncomfor	once a week	launch	Not Dependent	yes, my personal decision	unsafe	sufficient	moderate interested	need time	easy	good to health	good intension	strong agree	agree	disagree	strong disagree	agree	agree	strong agree	Good Perception
kombolcha	18-35	male	single	very good	normal weight	primary school	3 meal	yes, sometimes	I don't re	yes, most	mixture	other	incr meta	heated	beef	keeps me	hunger	once a day	dinner	Not Dependent	yes, my personal decision	I don't know	insufficient	highly interested	immediately stop	very easy	good to health	good intension	agree	disagree	disagree	disagree	agree	strong agree	disagree	Bad Perception
kombolcha	18-35	female	single	very good	normal weight	higher education	4 meal	yes, sometimes	intentional	yes, som	pepper	tea & coff	my habit	heated	beef	high nutr	nothing	only holy	launch	Not Dependent	no	neutral	sufficient	moderate interested	immediately stop	easy	no alternative	good intension	agree	strong disagree	agree	agree	agree	neutral	disagree	Bad Perception
kombolcha	18-35	female	married	good	normal weight	higher education	3 meal	yes, always	habit fr an	yes, som	chili pep	alcohol	incr meta	heated	beef	my traditi	nothing	few time we	dinner	Not Dependent	yes, my personal decision	neutral	good	in dilemma	need time	unsure	I didn't believe	good intension	disagree	disagree	agree	agree	agree	disagree	disagree	Bad Perception
kombolcha	36-50	male	single	excellent	over weight	secondary school	3 meal	no	peer pres	yes, most	mixture	alcohol	incr meta	raw beef	beef	cheers me	uncomfor	1-3t month	launch	Dependent	no	safe	sufficient	not interested	never	impossible	addicted	bad intension	disagree	strong disagree	disagree	agree	agree	disagree	strong disagree	Bad Perception
kombolcha	36-50	female	married	very good	normal weight	secondary school	2 meal	yes, sometimes	I don't re	yes, som	chili pep	tea & coff	good feel	heated	beef	high nutr	nothing	once a day	breakfast	Not Dependent	no	unsafe	sufficient	highly interested	immediately stop	very easy	good to health	good intension	agree	disagree	neutral	disagree	agree	neutral	disagree	Bad Perception
kombolcha	18-35	male	married	good	normal weight	secondary school	3 meal	no	peer pres	yes, som	chili pep	alcohol	incr meta	raw beef	beef	cheers me	nothing	1-3t month	launch	Dependent	no	safe	sufficient	not interested	may be	easy	good to health	good intension	agree	disagree	agree	disagree	agree	neutral	disagree	Bad Perception
kombolcha	18-35	female	married	very good	normal weight	higher education	3 meal	yes, sometimes	peer pres	yes, som	pepper	physical ex	good feel	raw beef	beef	keeps me	nothing	few time we	launch	Not Dependent	no	safe	sufficient	highly interested	immediately stop	not easy	addicted	good intension	agree	agree	disagree	disagree	agree	agree	agree	Good Perception
kombolcha	18-35	female	single	very good	normal weight	higher education	2 meal	yes, always	habit fr an	yes, som	mixture	other	no reason	raw beef	mutton	cheers me	nothing	few time we	dinner	Not Dependent	no	safe	sufficient	moderate interested	never	unsure	I didn't believe	good intension	agree	neutral	strong agree	neutral	strong agree	neutral	agree	Bad Perception
kombolcha	18-35	female	single	good	normal weight	higher education	3 meal	no	I don't re	yes, most	chili pep	other	incr meta	heated	beef	easy to prepare	nothing	few time day	launch	Not Dependent	yes, my personal decision	unsafe	good	highly interested	immediately stop	easy	I didn't believe	good intension	strong agree	agree	neutral	strong disagree	strong agree	strong agree	strong agree	Good Perception
kombolcha	18-35	female	single	excellent	normal weight	higher education	3 meal	yes, always	I don't re	yes, som	mixture	physical ex	incr meta	heated	mutton	my traditi	nothing	only holy	launch	Not Dependent	yes, advice by doctor	safe	sufficient	not interested	may be	easy	good to health	good intension	strong agree	agree	neutral	agree	strong agree	strong agree	agree	Good Perception
kombolcha	18-35	female	single	good	normal weight	higher education	3 meal	no	I don't re	yes, som	mixture	other	incr meta	heated	mutton	my traditi	uncomfor	only holy	launch	Not Dependent	yes, advice by doctor	safe	sufficient	not interested	never	easy	good to health	good intension	agree	neutral	disagree	strong agree	strong agree	agree	agree	Good Perception
kombolcha	18-35	female	married	excellent	normal weight	higher education	3 meal	yes, always	I don't re	yes, som	pepper	tea & coff	my habit	heated	mutton	my traditi	nothing	only holy	breakfast	Not Dependent	yes, my personal decision	unsafe	insufficient	highly interested	immediately stop	very easy	I didn't believe	good intension	strong agree	neutral	neutral	strong disagree	strong agree	strong agree	strong agree	Good Perception
kombolcha	18-35	female	married	very good	normal weight	higher education	4 meal	yes, always	intentional	yes, som	chili pep	physical ex	good feel	heated	beef	easy to prepare	uncomfor	few time we	launch	Not Dependent	no	neutral	sufficient	moderate interested	may be	very easy	I didn't believe	good intension	neutral	agree	agree	neutral	disagree	disagree	strong disagree	Bad Perception
kombolcha	18-35	male	single	good	under weight	higher education	3 meal	yes, sometimes	intentional	yes, som	mixture	other	good feel	raw beef	beef	cheers me	hunger	once a day	launch	Not Dependent	no	unsafe	good	not interested	need time	unsure	addicted	good intension	agree	neutral	disagree	agree	disagree	agree	neutral	Good Perception
kombolcha	18-35	female	married	good	under weight	higher education	1 meal	no	I don't re	yes, som	chili pep	other	incr meta	heated	beef	cheers me	nothing	only holy	launch	Not Dependent	yes, advice by doctor	safe	sufficient	in dilemma	need time	unsure	I didn't believe	bad intension	agree	neutral	agree	neutral	disagree	strong agree	disagree	Bad Perception
kombolcha	18-35	female	widow	good	normal weight	secondary school	3 meal	yes, sometimes	I don't re	yes, most	mixture	tea & coff	good feel	heated	beef	easy to prepare	hunger	1-3t month	launch	Not Dependent	no	safe	sufficient	in dilemma	need time	easy	good to health	good intension	neutral	disagree	agree	disagree	strong disagree	neutral	strong disagree	Bad Perception
kombolcha	18-35	female	single	poor	under weight	higher education	3 meal	yes, always	peer pres	yes, som	chili pep	other	no reason	heated	beef	cheers me	nothing	few time we	dinner	Not Dependent	no	safe	sufficient	highly interested	need time	not easy	addicted	good intension	agree	agree	neutral	agree	agree	disagree	disagree	Bad Perception
kombolcha	36-50	female	single	good	under weight	secondary school	3 meal	yes, always	I don't re	yes, som	mixture	alcohol	good feel	heated	beef	keeps me	nothing	only holy	breakfast	Not Dependent	yes, my personal decision	neutral	good	in dilemma	may be	unsure	I didn't believe	good intension	agree	neutral	agree	agree	neutral	disagree	strong disagree	Bad Perception
kombolcha	36-50	male	single	good	normal weight	higher education	3 meal	yes, sometimes	habit fr an	yes, som	mixture	other	no reason	heated	mutton	my traditi	nothing	only holy	all meals	Not Dependent	yes, my personal decision	I don't know	insufficient	highly interested	immediately stop	very easy	no alternative	good intension	strong agree	strong agree	disagree	agree	strong agree	strong agree	agree	Good Perception
kombolcha	36-50	male	single	very good	normal weight	higher education	3 meal	yes, sometimes	peer pres	yes, som	chili pep	tea & coff	good feel	heated	beef	easy to prepare	uncomfor	few time we	launch	Not Dependent	yes, advice by doctor	unsafe	sufficient	highly interested	immediately stop	easy	no alternative	good intension	agree	agree	disagree	strong disagree	agree	disagree	agree	Bad Perception
kombolcha	36-50	male	married	very good	normal weight	higher education	3 meal	yes, sometimes	habit fr an	yes, som	chili pep	tea & coff	good feel	heated	beef	easy to prepare	uncomfor	few time we	launch	Not Dependent	yes, advice by doctor	unsafe	sufficient	highly interested	immediately stop	easy	good to health	good intension	agree	agree	neutral	strong disagree	agree	disagree	agree	Bad Perception
kombolcha	18-35	male	married	very good	normal weight	secondary school	3 meal	no	habit fr an	yes, som	chili pep	tea & coff	good feel	heated	beef	easy to prepare	nothing	few time we	launch	Not Dependent	no	unsafe	sufficient	highly interested	immediately stop	easy	good to health	good intension	agree	agree	neutral	strong disagree	agree	disagree	agree	Bad Perception
kombolcha	18-35	male	married	good	normal weight	higher education	2 meal	no	habit fr an	yes, som	pepper	tea & coff	my habit	heated	beef	keeps me	hunger	1-3t month	launch	Not Dependent	no	safe	sufficient	highly interested	never	not easy	addicted	good intension	neutral	neutral	disagree	agree	disagree	agree	neutral	Good Perception
kombolcha	18-35	female	married	very good	over weight	higher education	3 meal	no	peer pres	yes, som	chili pep	tea & coff	my habit	raw beef	beef	cheers me	nothing	few time day	launch	Not Dependent	yes, advice by doctor	safe	sufficient	not interested	may be	very easy	no alternative	good intension	strong disagree	neutral	agree	disagree	agree	agree	strong agree	Bad Perception
kombolcha	36-50	male	single	excellent	over weight	secondary school	3 meal	no	peer pres	yes, most	mixture	alcohol	incr meta	raw beef	beef	cheers me	uncomfor	1-3t month	all meals	Dependent	no	safe	sufficient	strongly not interested	never	impossible	addicted	bad intension	disagree	disagree	disagree	agree	agree	disagree	disagree	Bad Perception
kombolcha	36-50	female	married	good	normal weight	higher education	3 meal	yes, always	habit fr an	yes, som	chili pep	tea & coff	good feel	heated	beef	easy to prepare	nothing	once a week	launch	Not Dependent	yes, my personal decision	unsafe	very good	not interested	immediately stop	easy	good to health	good intension	agree	disagree	strong disagree	disagree	strong agree	neutral	disagree	Bad Perception
kombolcha	>50	male	married	good	normal weight	higher education	3 meal	yes, sometimes	habit fr an	yes, most	mixture	alcohol	incr meta	heated	beef	my traditi	nothing	once a day	launch	Not Dependent	no	safe	sufficient	moderate interested	immediately stop	very easy	good to health	good intension	agree	disagree	strong disagree	disagree	agree	neutral	disagree	Bad Perception
kombolcha	36-50	female	single	good	normal weight	secondary school	2 meal	yes, sometimes	habit fr an	yes, som	chili pep	tea & coff	my habit	heated	beef	keeps me	nothing	few time we	launch	Not Dependent	no	unsafe	sufficient	not interested	may be	easy	no alternative	good intension	agree	disagree	neutral	disagree	agree	neutral	disagree	Bad Perception
kombolcha	36-50	male	widow	good	normal weight	higher education	3 meal	yes, always	peer pres	yes, most	mixture	alcohol	incr meta	raw beef	beef	cheers me	hunger	1-3t month	launch	Dependent	no	safe	sufficient	not interested	never	not easy	addicted	bad intension	agree	disagree	neutral	disagree	agree	neutral	neutral	Bad Perception
kombolcha	18-35	male	married	very good	normal weight	secondary school	3 meal	yes, always	intentional	yes, som	chili pep	tea & coff	my habit	heated	beef	high nutr	nothing	once a day	launch	Not Dependent	yes, my personal decision	neutral	good	in dilemma	may be	easy	I didn't believe	good intension	agree	disagree	neutral	disagree	agree	neutral	disagree	Bad Perception
kombolcha	36-50	male	married	good	normal weight	primary school	2 meal	yes, sometimes	I don't re	yes, som	pepper	other	incr meta	heated	mutton	keeps me	nothing	few time we	launch	Not Dependent	no	neutral	insufficient	moderate interested	need time	unsure	no alternative	good intension	agree	neutral	agree	neutral	agree	neutral	disagree	Bad Perception
kombolcha	18-35	female	married	good	normal weight	secondary school	3 meal	yes, always	I don't re	yes, most	chili pep	other	incr meta	heated	beef	high nutr	nothing	few time we	launch	Not Dependent	no	safe	sufficient	moderate interested	need time	unsure	I didn't believe	good intension	disagree	strong disagree	agree	disagree	agree	disagree	agree	Bad Perception
kombolcha	18-35	male	married	very good	normal weight	higher education	4 meal	no	intentional	yes, som	mixture	alcohol	incr meta	raw beef	beef	my traditi	uncomfor	few time we	launch	Dependent	no	unsafe	sufficient	not interested	never	not easy	addicted	good intension	disagree	disagree	disagree	agree	agree	disagree	disagree	Bad Perception
kombolcha	18-35	male	single	good	normal weight	secondary school	3 meal	yes, always	peer pres	yes, som	pepper	alcohol	good feel	heated	beef	cheers me	nothing	1-3t month	launch	Not Dependent	no	safe	insufficient	highly interested	may be	easy	good to health	good intension	agree	disagree	disagree	disagree	agree	disagree	neutral	Bad Perception
kombolcha	36-50	female	single	good	normal weight	higher education	3 meal	no	intentional	yes, most	chili pep	alcohol	incr meta	raw beef	beef	cheers me	uncomfor	once a week	launch	Dependent	no	unsafe	sufficient	not interested	never	impossible	addicted	good intension	disagree	disagree	disagree	agree	agree	neutral	disagree	Bad Perception
kombolcha	18-35	female	single	good	normal weight	higher education	3 meal	no	habit fr an	yes, most	chili pep	tea & coff	my habit	heated	beef	keeps me	nothing	once a day	breakfast	Not Dependent	yes, my personal decision	neutral	good	in dilemma	immediately stop	very easy	no alternative	good intension	agree	neutral	disagree	neutral	strong agree	neutral	disagree	Bad Perception
kombolcha	18-35	male	married	very good	normal weight	higher education	2 meal	no	peer pres	yes, most	mixture	alcohol	good feel	heated	beef	keeps me	nothing	only holy	launch	Not Dependent	yes, my personal decision	I don't know	insufficient	highly interested	immediately stop	very easy	good to health	good intension	agree	disagree	agree	disagree	agree	neutral	neutral	Bad Perception
kombolcha	18-35	male	single	good	normal weight	secondary school	3 meal	yes, sometimes	I don't re	yes, som	chili pep	other	my habit	raw beef	beef	my traditi	nothing	once a day	launch	Dependent	no	safe	sufficient	moderate interested	may be	easy	good to health	good intension	agree	disagree	agree	disagree	neutral	disagree	disagree	Bad Perception
kombolcha	18-35	male	single	good	normal weight	secondary school	3 meal	yes, sometimes	I don't re	yes, som	mixture	tea & coff	good feel	raw beef	beef	cheers me	nothing	few time day	launch	Dependent	no	neutral	sufficient	moderate interested	may be	unsure	I didn't believe	good intension	strong disagree	strong disagree	neutral	neutral	agree	neutral	strong agree	Bad Perception
kombolcha	36-50	male	married	excellent	over weight	secondary school	4 meal	yes, sometimes	I don't re	yes, som	chili pep	other	incr meta	heated	beef	cheers me	hunger	1-3t month	all meals	Not Dependent	no	neutral	good	not interested	need time	unsure	addicted	bad intension	disagree	disagree	disagree	agree	agree	neutral	disagree	Bad Perception
kombolcha	36-50	female	married	very good	normal weight	secondary school	3 meal	yes, sometimes	peer pres	yes, most	mixture	other	no reason	raw beef	beef	easy to prepare	uncomfor	few time we	launch	Dependent	no	I don't know	insufficient	highly interested	immediately stop	easy	I didn't believe	good intension	disagree	neutral	agree	neutral	agree	agree	agree	Bad Perception
kombolcha	36-50	male	married	good	normal weight	primary school	2 meal	no	habit fr an	yes, most	chili pep	alcohol	my habit	raw beef	beef	keeps me	uncomfor	once a day	dinner	Dependent	yes, advice by doctor	neutral	good	moderate interested	need time	unsure	I didn't believe	good intension	strong disagree	strong disagree	disagree	neutral	neutral	strong agree	strong agree	Bad Perception
kombolcha	18-35	male	married	very good	normal weight	higher education	3 meal	yes, sometimes	peer pres	yes, som	mixture	alcohol	incr meta	heated	beef	high nutr	uncomfor	once a day	launch	Not Dependent	no	safe	sufficient	highly interested	immediately stop	easy	good to health	good intension	agree	neutral	agree	disagree	strong agree	strong agree	agree	Bad Perception
kombolcha	18-35	male	single	excellent	normal weight	higher education	2 meal	yes, always	intentional	yes, som	chili pep	tea & coff	incr meta	raw beef	mutton	my traditi	nothing	once a week	breakfast	Dependent	yes, my personal decision	unsafe	good	highly interested	immediately stop	very easy	no alternative	good intension	agree	agree	strong agree	disagree	agree	agree	strong agree	Bad Perception
kombolcha	18-35	female	single	good	normal weight	secondary school	3 meal	no	I don't re	yes, most	pepper	other	incr meta	heated	beef	high nutr	nothing	few time we	launch	Not Dependent	yes, my personal decision	unsafe	good	not interested	immediately stop	easy	good to health	good intension	strong agree	agree	neutral	strong disagree	strong agree	strong agree	strong agree	Good Perception
kombolcha	18-35	male	married	good	normal weight	primary school	2 meal	no	habit fr an	yes, som	mixture	alcohol	my habit	raw beef	beef	easy to prepare	nothing	1-3t month	all meals	Dependent	no	I don't know	insufficient	moderate interested	need time	unsure	no alternative	good intension	strong disagree	disagree	agree	neutral	agree	neutral	neutral	Bad Perception
kombolcha	18-35	male	single	good	normal weight	secondary school	3 meal	yes, sometimes	peer pres	yes, som	chili pep	alcohol	incr meta	heated	beef	cheers me	nothing	once a day	launch	Not Dependent	no	safe	sufficient	in dilemma	may be	easy	good to health	good intension	agree	disagree	agree	disagree	agree	neutral	disagree	Bad Perception
kombolcha	36-50	female	married	good	normal weight	secondary school	3 meal	yes, sometimes	peer pres	yes, som	chili pep	alcohol	incr meta	heated	beef	cheers me	nothing	1-3t month	launch	Not Dependent	no	safe	sufficient	highly interested	immediately stop	easy	good to health	good intension	agree	disagree	disagree	agree	agree	neutral	disagree	Bad Perception
kombolcha	18-35	male	single	good	normal weight	higher education	3 meal	no	peer pres	yes, som	mixture	tea & coff	my habit	raw beef	beef	cheers me	nothing	1-3t month	launch	Dependent	no	safe	insufficient	moderate interested	may be	easy	no alternative	good intension	agree	disagree	disagree	disagree	agree	neutral	disagree	Bad Perception
kombolcha	18-35	male	married	very good	normal weight	primary school	4 meal	yes, sometimes	I don't re	yes, most	mixture	alcohol	incr meta	heated	beef	keeps me	nothing	once a day	launch	Not Dependent	yes, my personal decision	I don't know	sufficient	not interested	need time	unsure	no alternative	good intension	agree	disagree	disagree	disagree	agree	neutral	disagree	Bad Perception
kombolcha	36-50	male	married	very good	normal weight	higher education	3 meal	yes, always	intentional	yes, most	pepper	other	good feel	heated	beef	high nutr	hunger	once a week	breakfast	Not Dependent	no	neutral	good	not interested	need time	unsure	good to health	bad intension	agree	disagree	agree	disagree	agree	neutral	disagree	Bad Perception
kombolcha	18-35	male	single	good	normal weight	higher education	4 meal	no	habit fr an	yes, most	mixture	other	my habit	heated	beef	keeps me	nothing	few time we	launch	Not Dependent	yes, my personal decision	I don't know	good	moderate interested	immediately stop	very easy	no alternative	good intension	agree	disagree	strong disagree	disagree	agree	neutral	disagree	Bad Perception
kombolcha	18-35	female	single	good	normal weight	secondary school	3 meal	no	I don't re	yes, som	mixture	alcohol	good feel	raw beef	beef	my traditi	hunger	only holy	dinner	Not Dependent	no	unsafe	insufficient	moderate interested	may be	unsure	good to health	good intension	neutral	neutral	neutral	agree	agree	agree	neutral	Good Perception
kombolcha	36-50	male	married	good	normal weight	secondary school	3 meal	no	I don't re	yes, som	mixture	alcohol	good feel	raw beef	beef	my traditi	hunger	once a week	dinner	Not Dependent	yes, advice by doctor	safe	insufficient	moderate interested	never	unsure	I didn't believe	good intension	strong disagree	agree	agree	strong agree	strong agree	strong agree	strong agree	Bad Perception
kombolcha	18-35	male	single	good	normal weight	higher education	3 meal	yes, always	I don't re	yes, som	pepper	alcohol	incr meta	heated	beef	high nutr	nothing	few time we	launch	Not Dependent	no	safe	good	highly interested	may be	very easy	good to health	good intension	agree	neutral	strong disagree	agree	strong agree	disagree	neutral	Bad Perception
kombolcha	36-50	male	married	good	normal weight	higher education	3 meal	yes, always	peer pres	yes, som	chili pep	alcohol	incr meta	heated	beef	keeps me	uncomfor	1-3t month	dinner	Not Dependent	yes, advice by doctor	I don't know	sufficient	moderate interested	immediately stop	easy	good to health	good intension	agree	agree	neutral	disagree	strong agree	strong agree	agree	Good Perception
kombolcha	18-35	male	single	good	normal weight	secondary school	3 meal	yes, sometimes	intentional	yes, most	pepper	alcohol	incr meta	raw beef	beef	keeps me	uncomfor	once a week	launch	Dependent	no	neutral	sufficient	in dilemma	never	not easy	addicted	bad intension	disagree	strong disagree	disagree	agree	strong agree	strong agree	agree	Bad Perception
kombolcha	36-50	male	married	good	normal weight	secondary school	2 meal	yes, always	intentional	yes, som	chili pep	other	my habit	raw beef	beef	easy to prepare	uncomfor	once a week	dinner	Not Dependent	no	unsafe	insufficient	in dilemma	may be	easy	no alternative	good intension	strong disagree	strong disagree	agree	neutral	agree	disagree	strong agree	Bad Perception
kombolcha	18-35	male	single	good	normal weight	secondary school	3 meal	yes, sometimes	peer pres	yes, most	mixture	alcohol	good feel	raw beef	beef	keeps me	nothing	once a week	all meals	Not Dependent	yes, my personal decision	neutral	sufficient	not interested	immediately stop	easy	I didn't believe	good intension	strong disagree	strong disagree	neutral	disagree	strong agree	strong agree	neutral	Bad Perception
kombolcha	18-35	male	married	very good	normal weight	higher education	3 meal	yes, always	habit fr an	yes, som	mixture	other	incr meta	heated	beef	high nutr	nothing	1-3t month	launch	Not Dependent	yes, my personal decision	safe	sufficient	highly interested	immediately stop	very easy	good to health	good intension	agree	disagree	strong disagree	disagree	strong agree	neutral	disagree	Bad Perception
kombolcha	18-35	male	single	excellent	normal weight	secondary school	3 meal	yes, sometimes	I don't re	yes, som	chili pep	other	my habit	heated	beef	cheers me	nothing	once a day	launch	Not Dependent	no	safe	insufficient	moderate interested	immediately stop	easy	good to health	good intension	agree	disagree	strong disagree	disagree	strong agree	neutral	agree	Bad Perception
kombolcha	36-50	male	single	good	normal weight	higher education	3 meal	yes, always	I don't re	yes, som	pepper	alcohol	no reason	raw beef	beef	cheers me	uncomfor	once a day	dinner	Dependent	yes, advice by doctor	neutral	sufficient	not interested	need time	not easy	no alternative	bad intension	agree	strong disagree	agree	strong agree	neutral	strong agree	neutral	Bad Perception
kombolcha	36-50	male	widow	good	normal weight	secondary school	2 meal	yes, sometimes	intentional	yes, som	chili pep	tea & coff	my habit	raw beef	beef	my traditi	uncomfor	once a day	all meals	Dependent	yes, my personal decision	I don't know	insufficient	moderate interested	immediately stop	easy	I didn't believe	good intension	strong disagree	strong disagree	neutral	strong agree	neutral	agree	neutral	Bad Perception
kombolcha	18-35	male	single	good	normal weight	higher education	3 meal	yes, always	I don't re	yes, som	mixture	alcohol	incr meta	heated	beef	cheers me	nothing	once a week	launch	Not Dependent	no	safe	insufficient	highly interested	may be	very easy	good to health	good intension	disagree	strong disagree	agree	disagree	agree	neutral	disagree	Bad Perception
kombolcha	18-35	male	single	excellent	normal weight	higher education	3 meal	no	intentional	yes, som	mixture	alcohol	incr meta	heated	beef	high nutr	nothing	only holy	launch	Not Dependent	no	safe	sufficient	moderate interested	may be	easy	no alternative	good intension	disagree	strong disagree	agree	disagree	strong agree	neutral	disagree	Bad Perception
kombolcha	36-50	female	married	good	normal weight	primary school	3 meal	yes, sometimes	peer pres	yes, som	mixture	tea & coff	my habit	heated	beef	cheers me	nothing	once a day	launch	Not Dependent	no	unsafe	insufficient	in dilemma	may be	easy	good to health	good intension	disagree	strong disagree	neutral	disagree	agree	disagree	neutral	Bad Perception
kombolcha	>50	male	widow	good	over weight	primary school	4 meal	yes, always	I don't re	yes, som	chili pep	alcohol	no reason	heated	beef	my traditi	nothing	once a day	all meals	Not Dependent	no	unsafe	insufficient	not interested	need time	unsure	addicted	good intension	disagree	strong disagree	disagree	strong disagree	neutral	strong disagree	neutral	Bad Perception
kombolcha	36-50	female	married	very good	under weight	primary school	4 meal	yes, sometimes	I don't re	yes, most	mixture	other	no reason	raw beef	mutton	my traditi	hunger	few time we	launch	Not Dependent	no	I don't know	good	moderate interested	need time	easy	I didn't believe	good intension	neutral	disagree	neutral	disagree	neutral	disagree	agree	Bad Perception
kombolcha	18-35	male	married	good	normal weight	primary school	3 meal	yes, sometimes	peer pres	yes, som	chili pep	tea & coff	good feel	heated	mutton	cheers me	hunger	only holy	all meals	Not Dependent	yes, my personal decision	neutral	good	moderate interested	need time	easy	good to health	good intension	disagree	neutral	disagree	neutral	disagree	neutral	strong agree	Bad Perception
kombolcha	36-50	female	single	good	normal weight	secondary school	3 meal	yes, sometimes	peer pres	yes, most	mixture	tea & coff	good feel	heated	beef	my traditi	hunger	few time we	launch	Not Dependent	no	safe	sufficient	not interested	need time	very easy	good to health	good intension	strong agree	agree	strong agree	agree	neutral	strong agree	neutral	Bad Perception
kombolcha	36-50	male	single	very good	normal weight	secondary school	4 meal	yes, always	I don't re	yes, som	chili pep	other	good feel	heated	beef	cheers me	nothing	1-3t month	breakfast	Not Dependent	no	safe	sufficient	not interested	need time	unsure	no alternative	bad intension	neutral	disagree	neutral	disagree	neutral	disagree	neutral	Bad Perception
kombolcha	18-35	male	single	good	normal weight	higher education	3 meal	yes, always	I don't re	yes, som	mixture	tea & coff	good feel	heated	mutton	easy to prepare	nothing	few time we	launch	Not Dependent	yes, my personal decision	neutral	sufficient	moderate interested	need time	easy	good to health	good intension	neutral	agree	neutral	agree	neutral	agree	neutral	Good Perception
kombolcha	18-35	male	single	excellent	normal weight	higher education	3 meal	yes, sometimes	peer pres	yes, som	mixture	tea & coff	good feel	heated	beef	high nutr	nothing	1-3t month	launch	Not Dependent	yes, my personal decision	safe	sufficient	highly interested	immediately stop	easy	good to health	good intension	strong agree	strong agree	agree	disagree	agree	agree	strong agree	Bad Perception
kombolcha	36-50	female	married	excellent	normal weight	secondary school	4 meal	yes, sometimes	intentional	yes, som	chili pep	alcohol	incr meta	raw beef	mutton	easy to prepare	hunger	once a week	breakfast	Not Dependent	yes, my personal decision	neutral	sufficient	moderate interested	may be	not easy	addicted	good intension	disagree	neutral	agree	disagree	agree	neutral	strong agree	Bad Perception
kombolcha	>50	male	married	good	obese	higher education	3 meal	yes, always	I don't re	yes, som	mixture	alcohol	incr meta	heated	beef	high nutr	uncomfor	once a day	dinner	Not Dependent	yes, advice by doctor	I don't know	insufficient	not interested	need time	not easy	addicted	bad intension	strong disagree	disagree	strong disagree	neutral	strong disagree	neutral	disagree	Bad Perception
kombolcha	>50	male	widow	good	over weight	primary school	4 meal	yes, always	habit fr an	yes, most	mixture	alcohol	no reason	raw beef	beef	cheers me	nothing	once a day	dinner	Dependent	yes, my personal decision	I don't know	good	in dilemma	need time	not easy	addicted	good intension	disagree	neutral	disagree	agree	strong disagree	neutral	disagree	Bad Perception
kombolcha	18-35	male	single	very good	normal weight	secondary school	3 meal	yes, sometimes	peer pres	yes, most	mixture	tea & coff	my habit	raw beef	beef	cheers me	uncomfor	once a day	launch	Not Dependent	no	safe	insufficient	in dilemma	need time	not easy	addicted	bad intension	agree	strong disagree	strong disagree	disagree	strong agree	neutral	disagree	Bad Perception
kombolcha	36-50	male	married	good	normal weight	higher education	3 meal	yes, sometimes	I don't re	yes, most	mixture	tea & coff	good feel	raw beef	beef	my traditi	nothing	few time we	launch	Not Dependent	no	neutral	sufficient	moderate interested	may be	not easy	I didn't believe	good intension	disagree	strong disagree	agree	strong agree	strong agree	agree	strong agree	Bad Perception
kombolcha	18-35	male	single	good	normal weight	higher education	3 meal	yes, sometimes	habit fr an	yes, som	pepper	alcohol	my habit	raw beef	beef	cheers me	hunger	few time day	launch	Not Dependent	yes, advice by doctor	neutral	sufficient	highly interested	may be	impossible	I didn't believe	good intension	neutral	strong disagree	agree	strong agree	agree	agree	neutral	Bad Perception
kombolcha	36-50	male	married	good	normal weight	secondary school	3 meal	yes, always	peer pres	yes, som	chili pep	other	my habit	raw beef	beef	cheep	uncomfor	few time we	all meals	Not Dependent	yes, my personal decision	neutral	sufficient	moderate interested	need time	not easy	addicted	good intension	strong disagree	strong disagree	neutral	strong agree	strong agree	neutral	strong agree	Bad Perception
kombolcha	>50	male	married	good	normal weight	secondary school	3 meal	yes, always	habit fr an	yes, most	pepper	other	no reason	raw beef	beef	keeps me	uncomfor	few time day	dinner	Dependent	no	I don't know	insufficient	moderate interested	immediately stop	easy	I didn't believe	good intension	strong disagree	strong disagree	strong agree	strong agree	agree	neutral	agree	Bad Perception
kombolcha	18-35	female	widow	very good	normal weight	primary school	4 meal	yes, always	I don't re	yes, som	mixture	alcohol	my habit	raw beef	beef	my traditi	nothing	once a day	breakfast	Dependent	no	neutral	sufficient	moderate interested	never	not easy	addicted	good intension	agree	strong disagree	neutral	strong agree	strong agree	agree	strong agree	Bad Perception
kombolcha	>50	male	married	good	normal weight	higher education	2 meal	no	I don't re	yes, most	mixture	other	good feel	raw beef	beef	keeps me	nothing	once a week	all meals	Not Dependent	no	I don't know	insufficient	highly interested	never	not easy	no alternative	good intension	strong disagree	strong disagree	agree	strong agree	agree	neutral	agree	Bad Perception
kemise	18-35	female	single	good	normal weight	primary school	2 meal	no	I don't re	yes, most	mixture	tea & coff	no reason	heated	beef	cheers me	hunger	once a week	launch	Not Dependent	yes, my personal decision	I don't know	good	in dilemma	may be	easy	good to health	good intension	strong disagree	disagree	disagree	neutral	strong agree	neutral	strong agree	Bad Perception
kemise	36-50	male	married	good	normal weight	secondary school	2 meal	no	intentional	yes, som	pepper	tea & coff	incr meta	raw beef	beef	keeps me	nothing	few time day	breakfast	Dependent	no	neutral	insufficient	highly interested	never	impossible	addicted	good intension	strong disagree	neutral	strong disagree	agree	disagree	strong disagree	strong agree	Bad Perception
kemise	>50	male	married	good	normal weight	higher education	3 meal	no	habit fr an	yes, som	pepper	alcohol	good feel	heated	beef	my traditi	nothing	once a day	launch	Not Dependent	no	neutral	good	moderate interested	never	not easy	I didn't believe	good intension	strong agree	disagree	agree	disagree	agree	neutral	strong agree	Bad Perception
kemise	36-50	male	married	very good	normal weight	secondary school	3 meal	no	peer pres	yes, som	pepper	other	good feel	heated	mutton	easy to prepare	nothing	once a week	breakfast	Not Dependent	yes, my personal decision	safe	good	highly interested	immediately stop	very easy	good to health	good intension	disagree	neutral	disagree	neutral	disagree	agree	strong agree	Bad Perception
kemise	18-35	female	single	good	normal weight	primary school	2 meal	yes, sometimes	habit fr an	yes, som	mixture	tea & coff	incr meta	heated	mutton	easy to prepare	nothing	few time we	launch	Not Dependent	yes, advice by doctor	safe	sufficient	moderate interested	may be	easy	good to health	good intension	neutral	neutral	agree	neutral	agree	neutral	agree	Bad Perception
kemise	36-50	male	married	very good	over weight	primary school	3 meal	yes, always	I don't re	yes, som	mixture	alcohol	my habit	raw beef	beef	cheep	nothing	once a day	dinner	Dependent	no	unsafe	insufficient	in dilemma	never	unsure	I didn't believe	good intension	strong disagree	disagree	strong disagree	disagree	strong disagree	disagree	strong disagree	Bad Perception
kemise	18-35	female	single	very good	normal weight	secondary school	3 meal	yes, always	peer pres	yes, som	chili pep	alcohol	incr meta	raw beef	mutton	easy to prepare	hunger	few time we	launch	Not Dependent	yes, my personal decision	unsafe	sufficient	highly interested	may be	not easy	good to health	good intension	disagree	strong disagree	disagree	neutral	strong agree	neutral	disagree	Bad Perception
kemise	36-50	male	married	very good	normal weight	secondary school	3 meal	yes, sometimes	intentional	yes, som	pepper	alcohol	no reason	heated	beef	high nutr	uncomfor	1-3t month	dinner	Not Dependent	yes, my personal decision	I don't know	good	moderate interested	may be	easy	good to health	good intension	neutral	disagree	neutral	disagree	strong agree	disagree	disagree	Bad Perception
kemise	18-35	female	single	very good	normal weight	secondary school	3 meal	yes, sometimes	I don't re	yes, most	chili pep	other	good feel	heated	beef	cheers me	nothing	only holy	launch	Not Dependent	no	I don't know	insufficient	in dilemma	may be	easy	no alternative	good intension	disagree	strong disagree	agree	disagree	strong agree	disagree	neutral	Bad Perception
kemise	>50	male	married	good	over weight	higher education	3 meal	yes, always	habit fr an	yes, most	mixture	alcohol	incr meta	heated	beef	my traditi	nothing	once a day	launch	Not Dependent	yes, my personal decision	neutral	sufficient	moderate interested	immediately stop	easy	good to health	good intension	agree	disagree	agree	disagree	strong agree	neutral	disagree	Bad Perception
kemise	18-35	male	single	very good	normal weight	secondary school	3 meal	yes, sometimes	I don't re	yes, som	chili pep	other	my habit	raw beef	beef	cheers me	nothing	only holy	launch	Not Dependent	no	I don't know	insufficient	moderate interested	may be	easy	good to health	good intension	agree	disagree	agree	disagree	agree	disagree	disagree	Bad Perception
kemise	18-35	male	married	good	normal weight	higher education	3 meal	yes, always	intentional	yes, most	mixture	tea & coff	good feel	heated	beef	keeps me	nothing	once a week	launch	Not Dependent	yes, my personal decision	neutral	sufficient	highly interested	immediately stop	very easy	good to health	good intension	disagree	strong disagree	agree	strong disagree	agree	disagree	agree	Bad Perception
kemise	36-50	male	married	very good	obese	higher education	3 meal	yes, always	habit fr an	yes, most	mixture	alcohol	incr meta	raw beef	beef	my traditi	uncomfor	1-3t month	launch	Not Dependent	no	safe	sufficient	not interested	never	impossible	addicted	bad intension	disagree	strong disagree	agree	agree	strong agree	neutral	disagree	Bad Perception
kemise	36-50	male	married	good	over weight	primary school	4 meal	yes, sometimes	I don't re	yes, som	mixture	alcohol	good feel	raw beef	beef	high nutr	uncomfor	once a day	dinner	Not Dependent	yes, advice by doctor	I don't know	insufficient	in dilemma	need time	not easy	no alternative	bad intension	neutral	strong disagree	disagree	agree	disagree	neutral	strong agree	Bad Perception
kemise	18-35	male	single	excellent	normal weight	secondary school	3 meal	yes, sometimes	intentional	yes, som	pepper	other	good feel	heated	mutton	keeps me	nothing	only holy	all meals	Not Dependent	yes, my personal decision	safe	good	moderate interested	may be	easy	good to health	good intension	neutral	agree	neutral	agree	agree	neutral	strong agree	Good Perception
kemise	18-35	male	single	good	normal weight	secondary school	3 meal	yes, sometimes	I don't re	yes, most	chili pep	tea & coff	my habit	heated	beef	high nutr	nothing	once a day	breakfast	Not Dependent	yes, my personal decision	neutral	insufficient	highly interested	immediately stop	very easy	good to health	good intension	agree	strong disagree	strong agree	strong disagree	agree	neutral	disagree	Bad Perception
kemise	18-35	male	single	very good	normal weight	higher education	3 meal	yes, always	intentional	yes, som	mixture	other	incr meta	heated	beef	cheers me	nothing	only holy	launch	Not Dependent	no	safe	sufficient	moderate interested	may be	easy	no alternative	good intension	disagree	strong disagree	agree	disagree	strong agree	disagree	strong disagree	Bad Perception
kemise	18-35	female	single	good	normal weight	higher education	3 meal	yes, always	I don't re	yes, som	chili pep	other	my habit	heated	beef	high nutr	nothing	only holy	launch	Not Dependent	yes, my personal decision	safe	sufficient	highly interested	immediately stop	very easy	good to health	good intension	agree	strong disagree	agree	disagree	strong agree	disagree	strong disagree	Bad Perception
kemise	36-50	male	married	good	normal weight	higher education	3 meal	yes, sometimes	peer pres	yes, som	mixture	alcohol	good feel	heated	beef	cheers me	nothing	once a week	launch	Not Dependent	yes, advice by doctor	I don't know	insufficient	moderate interested	immediately stop	easy	good to health	good intension	agree	disagree	agree	disagree	strong agree	neutral	agree	Bad Perception
kemise	>50	male	married	good	normal weight	higher education	3 meal	yes, always	peer pres	yes, most	mixture	tea & coff	good feel	heated	beef	my traditi	nothing	once a day	launch	Not Dependent	no	safe	sufficient	highly interested	immediately stop	easy	good to health	good intension	disagree	strong disagree	disagree	strong disagree	agree	neutral	disagree	Bad Perception
kemise	18-35	male	single	very good	normal weight	higher education	3 meal	yes, sometimes	I don't re	yes, som	chili pep	other	good feel	raw beef	beef	cheers me	nothing	only holy	launch	Not Dependent	no	safe	insufficient	moderate interested	may be	easy	no alternative	good intension	disagree	strong disagree	agree	disagree	agree	neutral	disagree	Bad Perception
kemise	18-35	male	single	good	normal weight	secondary school	3 meal	no	intentional	yes, som	chili pep	alcohol	incr meta	heated	beef	cheers me	nothing	once a day	launch	Not Dependent	no	unsafe	insufficient	not interested	may be	easy	good to health	good intension	agree	disagree	disagree	strong disagree	strong agree	neutral	disagree	Bad Perception
kemise	18-35	male	single	very good	normal weight	secondary school	3 meal	yes, sometimes	peer pres	yes, som	mixture	alcohol	incr meta	heated	beef	cheers me	nothing	1-3t month	launch	Not Dependent	yes, my personal decision	I don't know	insufficient	moderate interested	immediately stop	very easy	good to health	good intension	disagree	strong disagree	agree	disagree	strong agree	neutral	disagree	Bad Perception
kemise	36-50	male	married	very good	over weight	secondary school	3 meal	yes, always	habit fr an	yes, most	chili pep	alcohol	kill micro	heated	beef	cheep	nothing	few time day	launch	Not Dependent	yes, my personal decision	unsafe	insufficient	moderate interested	may be	unsure	good to health	good intension	agree	neutral	disagree	neutral	agree	agree	agree	Good Perception
kemise	18-35	female	married	good	normal weight	secondary school	3 meal	yes, always	I don't re	yes, som	pepper	other	no reason	heated	mutton	easy to prepare	nothing	few time we	breakfast	Not Dependent	yes, advice by doctor	neutral	sufficient	not interested	immediately stop	easy	good to health	good intension	agree	strong disagree	neutral	disagree	strong agree	neutral	neutral	Bad Perception
kemise	36-50	male	married	very good	over weight	higher education	4 meal	yes, sometimes	peer pres	yes, most	chili pep	alcohol	kill micro	heated	beef	cheep	nothing	once a week	launch	Not Dependent	no	neutral	very good	in dilemma	may be	very easy	I didn't believe	good intension	strong agree	strong disagree	disagree	neutral	agree	agree	disagree	Bad Perception
kemise	18-35	female	single	good	normal weight	primary school	1 meal	no	habit fr an	yes, som	mixture	other	my habit	raw beef	mutton	easy to prepare	uncomfor	few time day	all meals	Not Dependent	no	neutral	good	strongly not interested	need time	unsure	no alternative	bad intension	agree	neutral	disagree	agree	agree	disagree	neutral	Bad Perception
kemise	18-35	male	single	excellent	normal weight	secondary school	1 meal	no	peer pres	yes, most	chili pep	alcohol	incr meta	raw beef	mutton	cheers me	hunger	1-3t month	all meals	Dependent	no	safe	insufficient	not interested	never	impossible	addicted	bad intension	disagree	disagree	neutral	agree	agree	neutral	neutral	Bad Perception
kemise	>50	male	married	very good	normal weight	higher education	3 meal	yes, always	habit fr an	yes, most	mixture	other	no reason	heated	mutton	my traditi	nothing	only holy	launch	Not Dependent	yes, my personal decision	unsafe	sufficient	in dilemma	immediately stop	very easy	good to health	good intension	agree	agree	disagree	disagree	agree	strong agree	agree	Good Perception
kemise	18-35	male	single	poor	under weight	secondary school	3 meal	yes, always	I don't re	yes, som	chili pep	tea & coff	good feel	heated	beef	easy to prepare	nothing	few time we	launch	Not Dependent	no	neutral	sufficient	in dilemma	may be	easy	good to health	good intension	agree	disagree	neutral	disagree	agree	neutral	neutral	Bad Perception
kemise	18-35	female	single	poor	under weight	primary school	3 meal	yes, sometimes	intentional	yes, som	pepper	tea & coff	my habit	heated	beef	easy to prepare	nothing	few time we	breakfast	Not Dependent	yes, my personal decision	safe	sufficient	moderate interested	immediately stop	easy	good to health	good intension	agree	neutral	disagree	neutral	agree	agree	agree	Good Perception
kemise	36-50	male	married	very good	obese	higher education	2 meal	yes, always	peer pres	yes, most	mixture	alcohol	incr meta	heated	beef	cheers me	nothing	1-3t month	launch	Not Dependent	no	I don't know	very good	not interested	may be	unsure	no alternative	bad intension	agree	disagree	disagree	neutral	strong agree	agree	disagree	Bad Perception
kemise	36-50	male	widow	very good	obese	secondary school	3 meal	no	peer pres	yes, most	mixture	alcohol	incr meta	raw beef	beef	keeps me	uncomfor	1-3t month	all meals	Dependent	no	safe	sufficient	in dilemma	never	impossible	addicted	bad intension	disagree	disagree	disagree	agree	agree	neutral	disagree	Bad Perception
kemise	36-50	female	married	good	normal weight	higher education	3 meal	yes, sometimes	habit fr an	yes, som	chili pep	tea & coff	my habit	heated	beef	my traditi	nothing	once a day	dinner	Not Dependent	no	neutral	sufficient	moderate interested	may be	easy	I didn't believe	good intension	strong agree	agree	disagree	neutral	strong agree	agree	agree	Good Perception
kemise	18-35	male	single	good	normal weight	primary school	3 meal	yes, sometimes	intentional	yes, most	chili pep	other	my habit	raw beef	beef	keeps me	hunger	once a week	breakfast	Not Dependent	yes, my personal decision	neutral	sufficient	in dilemma	need time	unsure	no alternative	good intension	agree	disagree	disagree	disagree	agree	neutral	disagree	Bad Perception
kemise	18-35	male	single	good	normal weight	secondary school	2 meal	no	I don't re	yes, som	chili pep	alcohol	incr meta	heated	beef	cheers me	nothing	once a week	launch	Not Dependent	no	safe	sufficient	moderate interested	may be	easy	good to health	good intension	agree	disagree	disagree	agree	agree	agree	agree	Bad Perception
kemise	18-35	male	single	good	normal weight	higher education	3 meal	yes, always	peer pres	yes, som	mixture	alcohol	good feel	raw beef	beef	cheers me	nothing	1-3t month	launch	Not Dependent	no	I don't know	sufficient	highly interested	immediately stop	easy	good to health	good intension	strong agree	strong agree	neutral	disagree	agree	agree	agree	Good Perception
kemise	>50	male	married	good	normal weight	higher education	2 meal	yes, sometimes	habit fr an	yes, most	mixture	alcohol	incr meta	heated	beef	my traditi	nothing	only holy	launch	Not Dependent	yes, my personal decision	I don't know	sufficient	not interested	immediately stop	very easy	good to health	good intension	agree	agree	disagree	strong disagree	agree	neutral	neutral	Good Perception
kemise	36-50	male	married	good	normal weight	secondary school	3 meal	no	intentional	yes, som	chili pep	other	no reason	heated	beef	high nutr	nothing	once a day	all meals	Not Dependent	yes, my personal decision	unsafe	good	not interested	may be	unsure	I didn't believe	good intension	agree	neutral	neutral	disagree	agree	agree	agree	Good Perception
kemise	>50	male	married	good	normal weight	secondary school	3 meal	yes, always	intentional	yes, som	chili pep	other	no reason	heated	beef	my traditi	nothing	few time we	launch	Not Dependent	no	I don't know	sufficient	not interested	need time	unsure	good to health	bad intension	agree	neutral	neutral	neutral	agree	agree	neutral	Good Perception
kemise	18-35	female	single	good	normal weight	higher education	3 meal	no	peer pres	yes, most	pepper	tea & coff	my habit	heated	beef	keeps me	nothing	few time day	dinner	Not Dependent	no	safe	insufficient	highly interested	need time	unsure	no alternative	good intension	agree	neutral	disagree	disagree	agree	agree	disagree	Bad Perception
kemise	36-50	male	single	good	obese	higher education	3 meal	yes, always	peer pres	yes, most	mixture	alcohol	incr meta	raw beef	beef	cheers me	hunger	1-3t month	all meals	Dependent	no	I don't know	sufficient	not interested	never	not easy	addicted	bad intension	agree	disagree	disagree	agree	agree	neutral	neutral	Bad Perception
kemise	36-50	male	married	very good	over weight	secondary school	3 meal	yes, sometimes	intentional	yes, som	chili pep	other	incr meta	heated	beef	high nutr	nothing	once a week	launch	Not Dependent	yes, my personal decision	neutral	good	moderate interested	may be	not easy	no alternative	good intension	agree	neutral	disagree	neutral	agree	agree	agree	Good Perception
kemise	18-35	male	married	excellent	normal weight	higher education	2 meal	yes, sometimes	peer pres	yes, most	chili pep	alcohol	incr meta	heated	beef	cheers me	nothing	once a day	all meals	Not Dependent	no	unsafe	good	strongly not interested	need time	not easy	I didn't believe	good intension	agree	disagree	disagree	neutral	agree	neutral	agree	Bad Perception
kemise	18-35	female	married	good	normal weight	primary school	3 meal	yes, always	I don't re	yes, som	mixture	other	no reason	heated	beef	keeps me	nothing	1-3t month	launch	Not Dependent	no	neutral	very good	strongly not interested	may be	easy	good to health	good intension	agree	disagree	disagree	neutral	agree	agree	agree	Bad Perception
kemise	18-35	male	single	excellent	normal weight	secondary school	3 meal	no	peer pres	yes, most	chili pep	alcohol	incr meta	raw beef	beef	cheers me	hunger	once a week	all meals	Not Dependent	no	I don't know	sufficient	highly interested	never	impossible	addicted	good intension	disagree	disagree	agree	agree	agree	neutral	disagree	Bad Perception
kemise	36-50	male	widow	very good	normal weight	primary school	2 meal	no	I don't re	yes, most	mixture	alcohol	my habit	raw beef	beef	high nutr	uncomfor	once a day	all meals	Not Dependent	no	unsafe	very good	not interested	never	impossible	addicted	good intension	agree	neutral	disagree	neutral	agree	neutral	neutral	Good Perception
kemise	18-35	male	married	very good	over weight	higher education	3 meal	yes, always	intentional	yes, som	mixture	other	my habit	heated	beef	my traditi	nothing	few time we	dinner	Not Dependent	yes, advice by doctor	unsafe	good	in dilemma	immediately stop	easy	good to health	good intension	strong agree	agree	strong disagree	disagree	agree	disagree	agree	Bad Perception
kemise	18-35	male	single	excellent	normal weight	higher education	3 meal	no	peer pres	yes, most	mixture	alcohol	incr meta	raw beef	beef	high nutr	uncomfor	once a day	launch	Dependent	no	I don't know	sufficient	not interested	never	impossible	addicted	bad intension	disagree	disagree	disagree	agree	agree	neutral	neutral	Bad Perception
kemise	18-35	female	married	good	normal weight	secondary school	3 meal	yes, sometimes	habit fr an	yes, som	pepper	tea & coff	good feel	heated	beef	easy to prepare	nothing	only holy	launch	Not Dependent	yes, my personal decision	neutral	sufficient	moderate interested	may be	very easy	good to health	good intension	agree	neutral	neutral	disagree	strong agree	neutral	neutral	Good Perception
kemise	36-50	male	widow	very good	normal weight	secondary school	3 meal	yes, sometimes	I don't re	yes, most	mixture	alcohol	incr meta	raw beef	beef	my traditi	uncomfor	1-3t month	launch	Dependent	yes, my personal decision	neutral	good	moderate interested	never	impossible	addicted	good intension	disagree	strong disagree	neutral	agree	strong agree	neutral	neutral	Bad Perception
kemise	18-35	male	married	excellent	normal weight	higher education	3 meal	yes, always	habit fr an	yes, som	mixture	tea & coff	my habit	heated	beef	keeps me	nothing	few time we	launch	Not Dependent	yes, my personal decision	I don't know	very good	in dilemma	may be	easy	good to health	good intension	agree	disagree	neutral	neutral	strong agree	neutral	agree	Bad Perception
kemise	36-50	male	single	very good	normal weight	secondary school	3 meal	yes, sometimes	peer pres	yes, most	mixture	alcohol	incr meta	raw beef	beef	cheers me	uncomfor	once a day	all meals	Dependent	no	safe	sufficient	not interested	never	not easy	addicted	bad intension	disagree	strong disagree	disagree	agree	agree	disagree	neutral	Bad Perception
kemise	18-35	female	single	good	normal weight	secondary school	4 meal	yes, sometimes	intentional	yes, som	chili pep	tea & coff	my habit	heated	beef	keeps me	nothing	few time we	launch	Not Dependent	yes, my personal decision	unsafe	good	in dilemma	need time	unsure	no alternative	good intension	agree	disagree	neutral	disagree	agree	agree	agree	Bad Perception
kemise	>50	male	married	good	normal weight	higher education	3 meal	yes, always	habit fr an	yes, som	chili pep	tea & coff	good feel	heated	beef	my traditi	nothing	once a day	launch	Not Dependent	yes, advice by doctor	neutral	good	in dilemma	immediately stop	easy	good to health	good intension	agree	disagree	disagree	disagree	agree	neutral	agree	Bad Perception
kemise	36-50	male	married	very good	over weight	primary school	2 meal	yes, sometimes	I don't re	yes, som	pepper	tea & coff	my habit	heated	beef	cheep	nothing	few time we	launch	Not Dependent	yes, my personal decision	unsafe	sufficient	in dilemma	may be	easy	good to health	good intension	agree	disagree	neutral	disagree	agree	neutral	agree	Bad Perception
kemise	18-35	male	single	excellent	normal weight	higher education	3 meal	no	peer pres	yes, most	mixture	alcohol	incr meta	raw beef	beef	cheers me	uncomfor	1-3t month	all meals	Dependent	no	I don't know	sufficient	not interested	never	impossible	addicted	bad intension	disagree	strong disagree	disagree	agree	agree	neutral	disagree	Bad Perception
kemise	>50	male	married	good	normal weight	higher education	3 meal	yes, sometimes	habit fr an	yes, som	mixture	alcohol	my habit	heated	beef	my traditi	nothing	once a week	launch	Not Dependent	yes, advice by doctor	safe	sufficient	highly interested	immediately stop	easy	good to health	good intension	agree	disagree	strong disagree	disagree	agree	neutral	disagree	Bad Perception
kemise	36-50	male	married	excellent	normal weight	higher education	3 meal	yes, sometimes	intentional	yes, most	mixture	tea & coff	no reason	heated	beef	my traditi	nothing	once a day	launch	Not Dependent	yes, my personal decision	unsafe	good	moderate interested	may be	easy	good to health	good intension	agree	disagree	neutral	disagree	strong agree	neutral	neutral	Bad Perception
kemise	18-35	male	single	poor	under weight	secondary school	3 meal	yes, always	I don't re	yes, most	chili pep	alcohol	incr meta	raw beef	beef	cheers me	hunger	1-3t month	all meals	Not Dependent	no	I don't know	very good	not interested	need time	unsure	no alternative	bad intension	agree	disagree	disagree	disagree	agree	neutral	agree	Bad Perception
kemise	36-50	female	married	good	normal weight	secondary school	2 meal	yes, always	intentional	yes, most	mixture	other	no reason	heated	mutton	high nutr	nothing	once a day	dinner	Not Dependent	no	neutral	good	strongly not interested	need time	not easy	I didn't believe	bad intension	strong agree	disagree	disagree	disagree	agree	disagree	agree	Bad Perception
kemise	18-35	female	single	very good	over weight	higher education	3 meal	yes, sometimes	I don't re	yes, som	pepper	tea & coff	good feel	heated	beef	easy to prepare	nothing	1-3t month	breakfast	Not Dependent	yes, my personal decision	unsafe	insufficient	not interested	need time	unsure	no alternative	good intension	agree	strong disagree	disagree	strong disagree	strong agree	neutral	neutral	Bad Perception
kemise	>50	male	married	good	over weight	higher education	3 meal	yes, always	habit fr an	yes, som	mixture	alcohol	my habit	heated	beef	my traditi	nothing	few time we	launch	Not Dependent	yes, advice by doctor	safe	sufficient	moderate interested	immediately stop	very easy	good to health	good intension	agree	disagree	disagree	disagree	agree	neutral	agree	Bad Perception
kemise	36-50	male	married	very good	obese	higher education	3 meal	yes, sometimes	habit fr an	yes, som	chili pep	other	good feel	heated	mutton	keeps me	nothing	few time day	launch	Not Dependent	yes, my personal decision	neutral	good	in dilemma	may be	easy	good to health	good intension	agree	strong disagree	neutral	disagree	agree	disagree	agree	Bad Perception
kemise	18-35	male	single	excellent	normal weight	secondary school	2 meal	no	peer pres	yes, most	mixture	alcohol	incr meta	raw beef	beef	cheers me	uncomfor	once a day	all meals	Dependent	no	safe	sufficient	strongly not interested	never	impossible	addicted	bad intension	disagree	strong disagree	agree	agree	strong agree	neutral	neutral	Bad Perception
kemise	36-50	male	married	very good	over weight	higher education	2 meal	yes, always	habit fr an	yes, most	mixture	alcohol	incr meta	heated	beef	keeps me	nothing	once a week	all meals	Not Dependent	yes, my personal decision	I don't know	insufficient	highly interested	immediately stop	very easy	I didn't believe	good intension	agree	disagree	strong disagree	strong disagree	strong agree	neutral	disagree	Bad Perception
kemise	18-35	male	single	good	normal weight	secondary school	3 meal	yes, sometimes	peer pres	yes, som	pepper	tea & coff	good feel	heated	beef	cheers me	nothing	1-3t month	launch	Not Dependent	no	unsafe	sufficient	moderate interested	may be	easy	good to health	good intension	agree	neutral	neutral	disagree	strong agree	neutral	agree	Good Perception
kemise	36-50	female	married	good	normal weight	secondary school	4 meal	yes, sometimes	I don't re	yes, most	chili pep	alcohol	incr meta	heated	beef	cheers me	nothing	once a day	all meals	Not Dependent	no	neutral	good	highly interested	may be	unsure	no alternative	good intension	agree	disagree	strong disagree	disagree	strong agree	neutral	agree	Bad Perception
kemise	18-35	female	single	poor	under weight	primary school	3 meal	yes, sometimes	I don't re	yes, som	chili pep	other	my habit	heated	beef	easy to prepare	nothing	few time we	launch	Not Dependent	no	unsafe	good	in dilemma	may be	unsure	I didn't believe	good intension	agree	disagree	strong disagree	disagree	strong agree	neutral	neutral	Bad Perception
kemise	18-35	male	single	very good	normal weight	higher education	4 meal	yes, always	intentional	yes, most	mixture	tea & coff	no reason	heated	beef	my traditi	nothing	once a day	breakfast	Not Dependent	yes, my personal decision	I don't know	very good	not interested	need time	not easy	no alternative	good intension	agree	disagree	strong disagree	neutral	agree	neutral	agree	Bad Perception
kemise	>50	male	married	good	normal weight	higher education	3 meal	yes, always	habit fr an	yes, som	mixture	other	no reason	heated	beef	my traditi	nothing	only holy	launch	Not Dependent	yes, my personal decision	safe	sufficient	moderate interested	immediately stop	easy	good to health	good intension	agree	strong disagree	strong disagree	disagree	strong agree	agree	agree	Bad Perception
kemise	18-35	male	single	very good	normal weight	higher education	3 meal	yes, sometimes	intentional	yes, som	mixture	tea & coff	good feel	heated	beef	my traditi	nothing	once a day	launch	Not Dependent	yes, my personal decision	safe	good	in dilemma	may be	easy	good to health	good intension	agree	disagree	neutral	neutral	agree	neutral	agree	Bad Perception
kemise	18-35	male	widow	very good	over weight	secondary school	2 meal	no	I don't re	yes, most	chili pep	other	my habit	raw beef	beef	keeps me	hunger	once a week	all meals	Dependent	no	unsafe	sufficient	in dilemma	never	not easy	addicted	good intension	agree	disagree	disagree	agree	strong agree	disagree	agree	Bad Perception
kemise	36-50	male	widow	excellent	obese	higher education	3 meal	yes, sometimes	peer pres	yes, most	mixture	alcohol	incr meta	raw beef	beef	cheers me	uncomfor	1-3t month	all meals	Dependent	no	neutral	insufficient	not interested	never	impossible	addicted	bad intension	disagree	strong disagree	disagree	agree	strong agree	neutral	neutral	Bad Perception
kemise	18-35	male	single	excellent	normal weight	secondary school	3 meal	yes, sometimes	I don't re	yes, som	pepper	other	no reason	heated	beef	my traditi	nothing	few time day	all meals	Not Dependent	no	I don't know	good	moderate interested	need time	unsure	no alternative	good intension	agree	disagree	neutral	neutral	strong agree	agree	agree	Bad Perception
kemise	36-50	male	married	good	normal weight	higher education	3 meal	yes, always	habit fr an	yes, most	chili pep	alcohol	good feel	heated	beef	my traditi	nothing	once a week	launch	Not Dependent	yes, my personal decision	neutral	insufficient	in dilemma	immediately stop	very easy	I didn't believe	good intension	agree	strong disagree	disagree	disagree	agree	disagree	agree	Bad Perception
kemise	18-35	male	married	good	over weight	secondary school	2 meal	yes, always	peer pres	yes, som	mixture	alcohol	incr meta	raw beef	beef	cheers me	hunger	once a day	launch	Dependent	no	safe	sufficient	not interested	never	not easy	addicted	bad intension	disagree	disagree	disagree	agree	strong agree	neutral	neutral	Bad Perception
kemise	18-35	female	single	good	normal weight	secondary school	3 meal	yes, sometimes	I don't re	yes, most	mixture	tea & coff	good feel	heated	beef	cheers me	nothing	few time we	dinner	Not Dependent	yes, my personal decision	neutral	good	in dilemma	may be	easy	good to health	good intension	agree	disagree	neutral	neutral	agree	neutral	agree	Bad Perception
kemise	36-50	female	married	good	normal weight	higher education	3 meal	no	intentional	yes, som	chili pep	other	good feel	heated	beef	my traditi	nothing	once a day	launch	Not Dependent	no	neutral	sufficient	moderate interested	may be	unsure	good to health	good intension	agree	disagree	neutral	disagree	agree	agree	agree	Bad Perception
kemise	>50	male	married	good	normal weight	higher education	3 meal	yes, always	peer pres	yes, most	mixture	other	my habit	heated	beef	my traditi	nothing	once a day	launch	Not Dependent	no	neutral	sufficient	moderate interested	may be	easy	good to health	good intension	agree	disagree	neutral	disagree	agree	neutral	neutral	Bad Perception
kemise	18-35	male	single	good	normal weight	primary school	3 meal	no	habit fr an	yes, most	mixture	other	no reason	heated	beef	keeps me	nothing	once a day	breakfast	Not Dependent	yes, my personal decision	neutral	very good	not interested	need time	unsure	I didn't believe	good intension	agree	disagree	neutral	neutral	agree	neutral	agree	Bad Perception
kemise	18-35	male	single	poor	under weight	secondary school	2 meal	yes, sometimes	peer pres	yes, som	chili pep	tea & coff	my habit	heated	beef	cheers me	nothing	few time we	launch	Not Dependent	no	unsafe	sufficient	in dilemma	may be	unsure	good to health	good intension	agree	disagree	disagree	disagree	agree	agree	agree	Bad Perception
kemise	36-50	male	married	very good	obese	higher education	3 meal	yes, always	peer pres	yes, most	mixture	alcohol	incr meta	heated	beef	cheers me	nothing	1-3t month	all meals	Not Dependent	no	safe	sufficient	moderate interested	need time	unsure	no alternative	good intension	agree	disagree	neutral	disagree	agree	neutral	neutral	Bad Perception
kemise	18-35	male	single	very good	normal weight	primary school	3 meal	no	I don't re	yes, som	chili pep	tea & coff	good feel	raw beef	beef	cheers me	hunger	once a day	launch	Not Dependent	no	neutral	good	in dilemma	never	not easy	addicted	bad intension	disagree	disagree	neutral	agree	agree	neutral	neutral	Bad Perception
kemise	>50	male	married	good	normal weight	higher education	3 meal	yes, always	habit fr an	yes, most	mixture	alcohol	incr meta	heated	beef	my traditi	nothing	only holy	launch	Not Dependent	yes, advice by doctor	safe	sufficient	moderate interested	immediately stop	easy	good to health	good intension	agree	agree	disagree	disagree	agree	neutral	agree	Good Perception
kemise	36-50	female	married	very good	normal weight	higher education	3 meal	yes, sometimes	I don't re	yes, most	chili pep	other	no reason	heated	beef	keeps me	nothing	few time we	all meals	Not Dependent	yes, my personal decision	unsafe	sufficient	not interested	may be	unsure	good to health	good intension	agree	strong disagree	disagree	disagree	strong agree	agree	agree	Bad Perception
kemise	18-35	male	married	good	normal weight	secondary school	3 meal	yes, sometimes	peer pres	yes, som	chili pep	other	no reason	heated	beef	cheers me	nothing	1-3t month	launch	Not Dependent	no	neutral	insufficient	in dilemma	immediately stop	easy	good to health	good intension	agree	disagree	neutral	disagree	strong agree	neutral	neutral	Bad Perception
kemise	36-50	male	married	excellent	normal weight	higher education	3 meal	yes, always	intentional	yes, most	mixture	alcohol	incr meta	raw beef	beef	cheers me	nothing	once a day	launch	Not Dependent	no	neutral	sufficient	strongly not interested	immediately stop	easy	good to health	good intension	agree	disagree	neutral	disagree	agree	neutral	agree	Bad Perception
kemise	18-35	male	single	excellent	normal weight	higher education	2 meal	yes, sometimes	I don't re	yes, most	mixture	other	no reason	heated	beef	high nutr	nothing	few time we	dinner	Not Dependent	no	unsafe	good	moderate interested	need time	unsure	I didn't believe	good intension	agree	disagree	neutral	disagree	agree	neutral	agree	Bad Perception
kemise	36-50	male	married	good	normal weight	higher education	3 meal	yes, always	intentional	yes, som	chili pep	tea & coff	my habit	heated	beef	cheep	nothing	once a day	launch	Not Dependent	yes, my personal decision	neutral	good	not interested	may be	easy	good to health	good intension	agree	disagree	neutral	disagree	strong agree	agree	agree	Bad Perception
kemise	18-35	male	single	very good	over weight	higher education	3 meal	yes, sometimes	habit fr an	yes, most	chili pep	other	good feel	raw beef	beef	my traditi	hunger	once a week	launch	Dependent	no	unsafe	insufficient	in dilemma	never	not easy	addicted	good intension	disagree	strong disagree	disagree	agree	agree	disagree	neutral	Bad Perception
kemise	36-50	male	single	excellent	normal weight	secondary school	3 meal	no	peer pres	yes, most	mixture	alcohol	incr meta	raw beef	beef	cheers me	uncomfor	1-3t month	all meals	Dependent	no	safe	sufficient	strongly not interested	never	impossible	addicted	bad intension	disagree	disagree	disagree	agree	agree	neutral	neutral	Bad Perception
kemise	36-50	female	married	very good	normal weight	secondary school	2 meal	yes, always	I don't re	yes, most	pepper	alcohol	no reason	heated	beef	keeps me	nothing	few time we	launch	Not Dependent	yes, my personal decision	I don't know	good	highly interested	need time	unsure	I didn't believe	good intension	agree	disagree	disagree	disagree	agree	neutral	neutral	Bad Perception
kemise	>50	male	married	good	normal weight	higher education	3 meal	yes, always	habit fr an	yes, som	mixture	other	my habit	heated	beef	my traditi	nothing	only holy	launch	Not Dependent	yes, advice by doctor	neutral	sufficient	moderate interested	immediately stop	very easy	good to health	good intension	strong agree	strong agree	strong disagree	strong disagree	strong agree	agree	agree	Good Perception
kemise	36-50	male	married	good	normal weight	secondary school	3 meal	yes, sometimes	peer pres	yes, som	chili pep	alcohol	incr meta	raw beef	beef	cheers me	nothing	few time we	launch	Not Dependent	no	unsafe	good	in dilemma	may be	easy	good to health	good intension	agree	disagree	disagree	disagree	agree	disagree	agree	Bad Perception
kemise	18-35	female	married	very good	normal weight	higher education	2 meal	no	habit fr an	yes, most	mixture	other	no reason	heated	beef	easy to prepare	nothing	few time day	all meals	Not Dependent	no	unsafe	insufficient	in dilemma	may be	easy	good to health	good intension	agree	disagree	strong disagree	strong disagree	strong agree	agree	agree	Bad Perception
kemise	18-35	female	single	good	normal weight	secondary school	3 meal	yes, sometimes	intentional	yes, som	pepper	tea & coff	good feel	heated	beef	high nutr	nothing	once a week	launch	Not Dependent	yes, my personal decision	I don't know	very good	not interested	may be	easy	good to health	good intension	agree	disagree	disagree	disagree	agree	neutral	neutral	Bad Perception
kemise	18-35	male	married	very good	over weight	higher education	4 meal	yes, always	habit fr an	yes, most	chili pep	other	my habit	heated	beef	my traditi	nothing	once a day	all meals	Not Dependent	no	neutral	good	moderate interested	immediately stop	easy	good to health	good intension	agree	neutral	neutral	disagree	agree	disagree	disagree	Bad Perception
kemise	18-35	male	single	good	normal weight	secondary school	2 meal	yes, sometimes	I don't re	yes, most	mixture	tea & coff	good feel	heated	beef	keeps me	nothing	few time we	launch	Not Dependent	yes, my personal decision	unsafe	sufficient	in dilemma	need time	unsure	I didn't believe	good intension	agree	disagree	strong disagree	disagree	strong agree	disagree	agree	Bad Perception
kemise	18-35	male	single	poor	under weight	primary school	3 meal	yes, sometimes	peer pres	yes, som	pepper	alcohol	incr meta	heated	beef	cheers me	nothing	once a week	breakfast	Not Dependent	no	safe	insufficient	highly interested	may be	unsure	no alternative	good intension	agree	disagree	disagree	disagree	agree	neutral	disagree	Bad Perception
Bati	36-50	male	married	very good	over weight	secondary school	2 meal	yes, sometimes	habit fr an	yes, most	chili pep	alcohol	my habit	heated	beef	keeps me	nothing	once a day	launch	Not Dependent	yes, my personal decision	I don't know	good	in dilemma	need time	unsure	no alternative	good intension	agree	disagree	neutral	neutral	strong agree	agree	agree	Bad Perception
Bati	18-35	male	single	good	normal weight	secondary school	3 meal	no	I don't re	yes, som	pepper	alcohol	incr meta	raw beef	beef	my traditi	nothing	few time we	launch	Not Dependent	yes, my personal decision	neutral	good	highly interested	immediately stop	easy	good to health	good intension	agree	disagree	neutral	neutral	agree	agree	neutral	Bad Perception
Bati	18-35	male	single	good	normal weight	secondary school	3 meal	no	habit fr an	yes, som	chili pep	tea & coff	my habit	heated	beef	cheers me	nothing	once a day	launch	Not Dependent	no	unsafe	insufficient	moderate interested	may be	easy	I didn't believe	good intension	agree	disagree	neutral	neutral	agree	neutral	neutral	Bad Perception
Bati	36-50	female	married	good	normal weight	higher education	3 meal	yes, sometimes	I don't re	yes, most	mixture	other	no reason	heated	beef	keeps me	nothing	few time day	all meals	Not Dependent	yes, my personal decision	I don't know	very good	in dilemma	immediately stop	easy	good to health	good intension	agree	disagree	disagree	disagree	agree	agree	agree	Bad Perception
Bati	18-35	male	single	good	normal weight	higher education	3 meal	yes, always	I don't re	yes, som	chili pep	alcohol	incr meta	heated	beef	cheers me	nothing	once a week	launch	Not Dependent	no	unsafe	sufficient	moderate interested	need time	unsure	no alternative	good intension	agree	disagree	neutral	disagree	agree	neutral	neutral	Bad Perception
Bati	36-50	female	married	good	normal weight	secondary school	3 meal	yes, sometimes	peer pres	yes, most	mixture	tea & coff	good feel	heated	beef	cheers me	nothing	once a day	launch	Not Dependent	yes, my personal decision	neutral	sufficient	not interested	may be	easy	good to health	good intension	agree	disagree	neutral	neutral	agree	agree	agree	Bad Perception
Bati	18-35	male	married	very good	over weight	higher education	3 meal	yes, always	intentional	yes, som	chili pep	other	my habit	heated	beef	my traditi	nothing	few time day	dinner	Not Dependent	no	neutral	sufficient	moderate interested	may be	easy	good to health	good intension	agree	disagree	disagree	neutral	agree	neutral	agree	Bad Perception
Bati	36-50	male	widow	excellent	normal weight	higher education	3 meal	yes, always	peer pres	yes, most	mixture	alcohol	incr meta	raw beef	beef	cheers me	uncomfor	1-3t month	all meals	Dependent	no	safe	sufficient	not interested	never	impossible	addicted	bad intension	disagree	strong disagree	disagree	agree	strong agree	agree	agree	Bad Perception
Bati	36-50	female	married	very good	over weight	secondary school	3 meal	yes, always	habit fr an	yes, som	pepper	other	my habit	heated	beef	my traditi	nothing	only holy	breakfast	Not Dependent	yes, my personal decision	unsafe	sufficient	moderate interested	may be	easy	good to health	good intension	agree	disagree	neutral	disagree	agree	neutral	neutral	Bad Perception
Bati	>50	male	married	good	normal weight	higher education	3 meal	yes, always	habit fr an	yes, most	mixture	alcohol	good feel	heated	beef	my traditi	nothing	only holy	launch	Not Dependent	yes, advice by doctor	I don't know	sufficient	moderate interested	immediately stop	easy	good to health	good intension	agree	agree	disagree	disagree	agree	agree	agree	Good Perception
Bati	18-35	female	single	good	normal weight	higher education	3 meal	yes, sometimes	I don't re	yes, som	pepper	tea & coff	no reason	heated	beef	keeps me	nothing	few time we	breakfast	Not Dependent	yes, my personal decision	safe	insufficient	highly interested	may be	easy	good to health	good intension	agree	disagree	strong disagree	neutral	strong agree	agree	agree	Bad Perception
Bati	18-35	male	single	poor	under weight	secondary school	2 meal	no	I don't re	yes, som	chili pep	other	my habit	heated	beef	high nutr	nothing	few time day	launch	Not Dependent	no	neutral	good	moderate interested	need time	unsure	no alternative	good intension	agree	disagree	strong disagree	neutral	agree	agree	agree	Bad Perception
Bati	36-50	male	single	excellent	normal weight	secondary school	3 meal	no	peer pres	yes, most	mixture	alcohol	incr meta	raw beef	beef	cheers me	uncomfor	1-3t month	all meals	Dependent	no	unsafe	sufficient	not interested	never	impossible	addicted	good intension	disagree	strong disagree	disagree	agree	agree	disagree	agree	Bad Perception
Bati	36-50	male	single	very good	obese	higher education	3 meal	yes, sometimes	habit fr an	yes, som	chili pep	alcohol	incr meta	heated	beef	cheers me	nothing	few time we	launch	Not Dependent	no	I don't know	good	moderate interested	immediately stop	very easy	I didn't believe	good intension	agree	disagree	neutral	agree	strong agree	neutral	agree	Bad Perception
Bati	18-35	male	single	good	normal weight	higher education	3 meal	yes, sometimes	intentional	yes, som	chili pep	alcohol	incr meta	heated	beef	keeps me	nothing	once a week	launch	Not Dependent	yes, my personal decision	I don't know	good	not interested	may be	easy	good to health	good intension	agree	disagree	neutral	disagree	agree	neutral	neutral	Bad Perception
Bati	36-50	male	married	good	normal weight	secondary school	3 meal	yes, always	I don't re	yes, most	chili pep	other	my habit	heated	beef	cheers me	nothing	once a day	launch	Not Dependent	yes, my personal decision	unsafe	sufficient	moderate interested	need time	unsure	no alternative	good intension	agree	neutral	neutral	disagree	agree	neutral	neutral	Good Perception
Bati	>50	male	married	good	normal weight	higher education	3 meal	yes, always	habit fr an	yes, most	mixture	alcohol	incr meta	heated	beef	my traditi	nothing	only holy	launch	Not Dependent	yes, advice by doctor	safe	sufficient	highly interested	immediately stop	easy	good to health	good intension	strong agree	strong agree	disagree	disagree	strong agree	neutral	agree	Good Perception
Bati	18-35	male	single	good	normal weight	secondary school	3 meal	no	peer pres	yes, som	chili pep	tea & coff	good feel	heated	beef	cheers me	nothing	once a day	launch	Not Dependent	no	unsafe	insufficient	not interested	immediately stop	very easy	good to health	good intension	agree	strong disagree	disagree	disagree	agree	neutral	neutral	Bad Perception
Bati	36-50	female	married	good	normal weight	higher education	3 meal	yes, sometimes	I don't re	yes, som	chili pep	alcohol	incr meta	heated	beef	high nutr	nothing	few time we	breakfast	Not Dependent	yes, my personal decision	unsafe	sufficient	moderate interested	may be	unsure	good to health	good intension	agree	disagree	neutral	disagree	agree	neutral	agree	Bad Perception
Bati	18-35	male	single	poor	under weight	secondary school	3 meal	no	intentional	yes, most	chili pep	alcohol	incr meta	heated	beef	high nutr	nothing	once a day	launch	Not Dependent	no	neutral	sufficient	in dilemma	may be	easy	I didn't believe	good intension	agree	disagree	disagree	disagree	agree	agree	agree	Bad Perception
Bati	18-35	male	single	excellent	normal weight	secondary school	3 meal	no	peer pres	yes, most	mixture	alcohol	incr meta	raw beef	beef	cheers me	uncomfor	1-3t month	all meals	Dependent	no	I don't know	sufficient	not interested	never	impossible	addicted	bad intension	agree	disagree	disagree	disagree	agree	neutral	agree	Bad Perception
Bati	36-50	male	married	very good	over weight	primary school	3 meal	yes, sometimes	I don't re	yes, most	chili pep	tea & coff	my habit	heated	beef	keeps me	nothing	once a day	launch	Not Dependent	no	neutral	sufficient	moderate interested	may be	easy	good to health	good intension	agree	disagree	strong disagree	disagree	agree	neutral	agree	Bad Perception
Bati	36-50	male	widow	excellent	obese	secondary school	3 meal	no	peer pres	yes, most	mixture	alcohol	incr meta	raw beef	beef	cheers me	uncomfor	1-3t month	all meals	Dependent	no	unsafe	sufficient	not interested	never	impossible	addicted	good intension	disagree	disagree	disagree	agree	strong agree	neutral	neutral	Bad Perception
Bati	36-50	male	married	good	normal weight	higher education	3 meal	yes, always	I don't re	yes, most	mixture	tea & coff	incr meta	heated	beef	my traditi	nothing	once a day	launch	Not Dependent	no	unsafe	sufficient	in dilemma	may be	easy	good to health	good intension	agree	disagree	neutral	disagree	agree	agree	agree	Bad Perception
Bati	18-35	male	single	good	normal weight	higher education	1 meal	yes, sometimes	I don't re	yes, som	mixture	tea & coff	no reason	heated	beef	my traditi	nothing	1-3t month	all meals	Not Dependent	no	I don't know	good	in dilemma	may be	easy	good to health	good intension	agree	disagree	neutral	disagree	agree	neutral	agree	Bad Perception
Bati	36-50	female	married	good	normal weight	secondary school	3 meal	yes, always	peer pres	yes, som	mixture	alcohol	incr meta	heated	beef	cheers me	nothing	few time we	launch	Not Dependent	no	safe	insufficient	highly interested	may be	very easy	good to health	good intension	agree	disagree	neutral	disagree	agree	disagree	agree	Bad Perception
Bati	>50	male	married	good	normal weight	higher education	3 meal	yes, always	habit fr an	yes, som	mixture	alcohol	incr meta	heated	beef	my traditi	nothing	1-3t month	launch	Not Dependent	yes, advice by doctor	neutral	sufficient	moderate interested	immediately stop	easy	good to health	good intension	agree	agree	neutral	disagree	agree	neutral	agree	Good Perception
Bati	36-50	male	married	good	normal weight	higher education	3 meal	yes, sometimes	I don't re	yes, som	chili pep	other	no reason	heated	beef	keeps me	nothing	1-3t month	launch	Not Dependent	no	neutral	sufficient	moderate interested	may be	easy	good to health	good intension	agree	disagree	neutral	disagree	agree	agree	agree	Bad Perception
Bati	36-50	female	married	good	normal weight	secondary school	3 meal	yes, sometimes	I don't re	yes, som	chili pep	alcohol	incr meta	heated	mutton	keeps me	nothing	few time day	breakfast	Not Dependent	yes, my personal decision	unsafe	good	not interested	need time	unsure	good to health	good intension	agree	disagree	neutral	disagree	agree	neutral	agree	Bad Perception
Bati	18-35	male	married	good	normal weight	higher education	2 meal	yes, sometimes	I don't re	yes, most	chili pep	alcohol	incr meta	raw beef	beef	cheers me	nothing	once a week	launch	Not Dependent	no	neutral	insufficient	in dilemma	immediately stop	easy	good to health	good intension	agree	disagree	disagree	disagree	agree	disagree	neutral	Bad Perception
Bati	18-35	male	married	very good	normal weight	higher education	3 meal	no	intentional	yes, som	chili pep	tea & coff	my habit	heated	beef	high nutr	nothing	few time day	launch	Not Dependent	yes, my personal decision	neutral	insufficient	highly interested	need time	unsure	no alternative	good intension	agree	disagree	disagree	disagree	agree	neutral	agree	Bad Perception
Bati	36-50	male	married	very good	normal weight	higher education	3 meal	yes, sometimes	intentional	yes, som	mixture	other	my habit	heated	beef	high nutr	nothing	few time we	breakfast	Not Dependent	no	neutral	sufficient	not interested	may be	easy	good to health	good intension	agree	disagree	disagree	disagree	agree	neutral	agree	Bad Perception
Bati	18-35	male	single	good	normal weight	secondary school	3 meal	yes, sometimes	I don't re	yes, most	chili pep	other	no reason	heated	beef	my traditi	nothing	few time we	launch	Not Dependent	yes, my personal decision	I don't know	good	strongly not interested	immediately stop	easy	no alternative	good intension	agree	disagree	neutral	disagree	agree	neutral	neutral	Bad Perception
Bati	18-35	female	single	good	normal weight	secondary school	3 meal	yes, sometimes	intentional	yes, som	chili pep	tea & coff	good feel	heated	beef	easy to prepare	nothing	once a day	launch	Not Dependent	no	neutral	sufficient	in dilemma	may be	easy	good to health	good intension	agree	disagree	neutral	neutral	strong agree	agree	agree	Bad Perception
Bati	36-50	male	married	very good	over weight	secondary school	3 meal	yes, always	peer pres	yes, most	mixture	alcohol	incr meta	heated	beef	cheers me	nothing	once a day	launch	Not Dependent	no	unsafe	sufficient	in dilemma	need time	unsure	I didn't believe	good intension	agree	disagree	neutral	disagree	agree	neutral	neutral	Bad Perception
Bati	>50	male	married	good	normal weight	higher education	3 meal	yes, always	habit fr an	yes, most	mixture	tea & coff	no reason	heated	beef	my traditi	nothing	once a day	launch	Not Dependent	yes, advice by doctor	safe	sufficient	moderate interested	immediately stop	easy	good to health	good intension	agree	disagree	neutral	disagree	agree	neutral	agree	Bad Perception
Bati	36-50	female	married	good	normal weight	higher education	3 meal	yes, always	peer pres	yes, som	chili pep	alcohol	incr meta	heated	beef	cheers me	nothing	once a week	launch	Not Dependent	no	safe	sufficient	moderate interested	may be	very easy	good to health	good intension	agree	strong disagree	disagree	disagree	agree	neutral	neutral	Bad Perception
Bati	36-50	male	married	very good	over weight	higher education	4 meal	yes, sometimes	habit fr an	yes, som	chili pep	tea & coff	good feel	heated	beef	my traditi	nothing	few time we	launch	Not Dependent	no	unsafe	good	highly interested	may be	easy	no alternative	good intension	agree	disagree	neutral	disagree	agree	neutral	agree	Bad Perception
Bati	36-50	male	single	good	normal weight	higher education	2 meal	yes, sometimes	habit fr an	yes, most	mixture	alcohol	incr meta	heated	beef	cheers me	nothing	few time day	launch	Not Dependent	no	unsafe	insufficient	not interested	need time	unsure	good to health	good intension	agree	strong disagree	disagree	disagree	agree	neutral	agree	Bad Perception
Bati	18-35	female	single	good	normal weight	secondary school	3 meal	yes, sometimes	I don't re	yes, most	pepper	tea & coff	good feel	heated	beef	keeps me	nothing	once a day	dinner	Not Dependent	yes, my personal decision	neutral	good	not interested	may be	unsure	no alternative	good intension	agree	disagree	neutral	disagree	agree	neutral	neutral	Bad Perception
Bati	18-35	male	married	good	normal weight	higher education	2 meal	yes, sometimes	intentional	yes, som	chili pep	other	no reason	raw beef	mutton	my traditi	nothing	few time we	breakfast	Not Dependent	yes, my personal decision	I don't know	very good	strongly not interested	need time	unsure	I didn't believe	good intension	agree	strong disagree	disagree	neutral	agree	agree	agree	Bad Perception
Bati	18-35	male	single	very good	normal weight	secondary school	3 meal	no	I don't re	yes, most	chili pep	tea & coff	my habit	heated	beef	high nutr	nothing	once a day	launch	Not Dependent	no	neutral	good	in dilemma	may be	easy	good to health	good intension	agree	disagree	neutral	neutral	agree	neutral	agree	Bad Perception
Bati	36-50	male	widow	excellent	normal weight	higher education	4 meal	no	intentional	yes, most	mixture	alcohol	incr meta	raw beef	beef	my traditi	hunger	once a week	all meals	Not Dependent	no	neutral	good	in dilemma	never	not easy	addicted	bad intension	agree	disagree	disagree	disagree	agree	agree	agree	Bad Perception
Bati	18-35	male	single	poor	under weight	secondary school	3 meal	no	I don't re	yes, som	chili pep	other	no reason	raw beef	beef	cheers me	nothing	few time day	launch	Not Dependent	yes, my personal decision	unsafe	sufficient	moderate interested	need time	unsure	no alternative	good intension	agree	disagree	neutral	disagree	agree	agree	agree	Bad Perception
Bati	36-50	male	single	very good	over weight	higher education	3 meal	no	habit fr an	yes, most	mixture	tea & coff	good feel	heated	beef	cheers me	nothing	few time we	launch	Not Dependent	yes, my personal decision	I don't know	very good	not interested	may be	unsure	I didn't believe	good intension	agree	disagree	strong disagree	strong disagree	agree	neutral	neutral	Bad Perception
Bati	36-50	female	married	good	normal weight	secondary school	3 meal	yes, sometimes	I don't re	yes, som	pepper	alcohol	incr meta	heated	beef	cheers me	nothing	once a week	launch	Not Dependent	no	unsafe	sufficient	moderate interested	may be	easy	good to health	good intension	agree	disagree	disagree	strong disagree	agree	neutral	neutral	Bad Perception
Bati	36-50	male	married	good	normal weight	secondary school	2 meal	yes, sometimes	I don't re	yes, most	chili pep	other	my habit	heated	beef	my traditi	nothing	once a day	breakfast	Not Dependent	yes, my personal decision	I don't know	good	moderate interested	may be	easy	good to health	good intension	agree	disagree	disagree	disagree	agree	agree	neutral	Bad Perception
Bati	36-50	male	widow	excellent	normal weight	higher education	3 meal	yes, sometimes	peer pres	yes, most	mixture	alcohol	incr meta	raw beef	beef	cheers me	uncomfor	1-3t month	all meals	Dependent	no	unsafe	good	in dilemma	never	not easy	addicted	good intension	agree	disagree	disagree	disagree	agree	neutral	agree	Bad Perception
Bati	18-35	male	single	poor	under weight	primary school	2 meal	yes, sometimes	habit fr an	yes, som	pepper	other	my habit	heated	beef	keeps me	nothing	few time day	breakfast	Not Dependent	yes, my personal decision	unsafe	very good	not interested	need time	unsure	I didn't believe	good intension	agree	disagree	neutral	disagree	agree	agree	agree	Bad Perception
Bati	18-35	male	widow	excellent	normal weight	secondary school	1 meal	no	peer pres	yes, most	mixture	alcohol	incr meta	raw beef	beef	cheers me	uncomfor	1-3t month	launch	Dependent	no	safe	sufficient	strongly not interested	never	impossible	addicted	bad intension	disagree	strong disagree	disagree	agree	strong agree	neutral	neutral	Bad Perception
Bati	36-50	male	married	very good	over weight	secondary school	3 meal	yes, sometimes	peer pres	yes, most	mixture	other	no reason	raw beef	beef	cheers me	uncomfor	once a day	launch	Not Dependent	no	I don't know	good	not interested	need time	unsure	no alternative	bad intension	agree	disagree	disagree	disagree	agree	neutral	agree	Bad Perception
Bati	36-50	female	married	good	normal weight	higher education	3 meal	yes, always	I don't re	yes, som	chili pep	tea & coff	incr meta	heated	beef	easy to prepare	nothing	few time we	launch	Not Dependent	yes, my personal decision	neutral	good	moderate interested	may be	easy	good to health	good intension	agree	disagree	disagree	disagree	agree	agree	agree	Bad Perception
Bati	36-50	male	married	good	normal weight	secondary school	2 meal	no	I don't re	yes, most	mixture	tea & coff	my habit	heated	beef	cheers me	nothing	once a day	launch	Not Dependent	yes, my personal decision	neutral	good	not interested	may be	easy	no alternative	good intension	agree	disagree	disagree	disagree	agree	neutral	agree	Bad Perception
Bati	>50	male	married	good	normal weight	higher education	3 meal	yes, always	habit fr an	yes, som	mixture	alcohol	incr meta	heated	beef	my traditi	nothing	only holy	launch	Not Dependent	yes, advice by doctor	safe	sufficient	moderate interested	immediately stop	easy	good to health	good intension	agree	disagree	strong disagree	disagree	agree	agree	agree	Bad Perception
Bati	36-50	male	single	very good	over weight	higher education	3 meal	no	peer pres	yes, most	mixture	alcohol	incr meta	raw beef	beef	keeps me	hunger	1-3t month	all meals	Not Dependent	no	safe	good	not interested	never	not easy	addicted	bad intension	agree	disagree	disagree	disagree	agree	agree	agree	Bad Perception
Bati	18-35	male	single	excellent	normal weight	higher education	3 meal	no	peer pres	yes, most	mixture	alcohol	incr meta	raw beef	beef	cheers me	uncomfor	1-3t month	all meals	Dependent	no	unsafe	insufficient	in dilemma	never	impossible	addicted	good intension	agree	disagree	disagree	agree	agree	agree	agree	Bad Perception
Bati	18-35	male	married	good	normal weight	secondary school	2 meal	yes, sometimes	habit fr an	yes, most	mixture	tea & coff	my habit	heated	beef	cheers me	nothing	once a day	launch	Not Dependent	no	neutral	sufficient	not interested	may be	unsure	good to health	bad intension	agree	disagree	strong disagree	disagree	agree	neutral	agree	Bad Perception
Bati	36-50	male	single	good	over weight	secondary school	3 meal	yes, sometimes	intentional	yes, most	chili pep	other	no reason	heated	beef	keeps me	nothing	once a week	launch	Not Dependent	yes, my personal decision	I don't know	good	in dilemma	need time	unsure	I didn't believe	good intension	agree	disagree	disagree	strong disagree	agree	agree	agree	Bad Perception
Bati	>50	male	married	good	normal weight	higher education	3 meal	yes, always	habit fr an	yes, most	chili pep	alcohol	incr meta	heated	beef	my traditi	nothing	only holy	launch	Not Dependent	no	neutral	sufficient	moderate interested	immediately stop	easy	good to health	good intension	agree	disagree	disagree	strong disagree	agree	neutral	neutral	Bad Perception
Bati	18-35	male	single	good	normal weight	higher education	3 meal	yes, sometimes	peer pres	yes, som	chili pep	tea & coff	my habit	heated	beef	cheers me	nothing	once a day	launch	Not Dependent	no	neutral	sufficient	not interested	may be	easy	good to health	good intension	agree	disagree	disagree	disagree	agree	agree	agree	Bad Perception
Bati	36-50	male	married	very good	over weight	higher education	3 meal	no	habit fr an	yes, som	chili pep	alcohol	my habit	heated	beef	cheers me	nothing	few time day	launch	Not Dependent	no	unsafe	insufficient	not interested	may be	easy	good to health	good intension	agree	disagree	disagree	disagree	agree	neutral	agree	Bad Perception
Bati	18-35	male	single	excellent	normal weight	secondary school	3 meal	yes, always	intentional	yes, most	mixture	other	no reason	heated	beef	my traditi	nothing	once a week	dinner	Not Dependent	yes, my personal decision	I don't know	sufficient	in dilemma	may be	easy	good to health	good intension	agree	strong disagree	disagree	disagree	agree	disagree	neutral	Bad Perception
Bati	36-50	male	single	good	normal weight	higher education	2 meal	yes, sometimes	peer pres	yes, som	chili pep	tea & coff	good feel	heated	beef	cheers me	nothing	1-3t month	breakfast	Not Dependent	no	neutral	very good	moderate interested	need time	unsure	I didn't believe	good intension	agree	strong disagree	disagree	strong disagree	agree	neutral	agree	Bad Perception
Bati	36-50	male	married	very good	over weight	higher education	3 meal	yes, always	peer pres	yes, most	mixture	alcohol	incr meta	heated	beef	high nutr	nothing	once a day	launch	Not Dependent	yes, my personal decision	neutral	good	in dilemma	immediately stop	easy	no alternative	good intension	agree	disagree	strong disagree	neutral	agree	agree	agree	Bad Perception
Bati	36-50	female	married	good	normal weight	secondary school	3 meal	yes, sometimes	intentional	yes, som	pepper	tea & coff	my habit	heated	beef	keeps me	nothing	few time we	launch	Not Dependent	yes, my personal decision	neutral	sufficient	not interested	may be	easy	no alternative	good intension	agree	disagree	strong disagree	disagree	agree	neutral	neutral	Bad Perception
Bati	>50	male	married	good	normal weight	higher education	3 meal	yes, always	habit fr an	yes, most	chili pep	alcohol	incr meta	heated	beef	my traditi	nothing	only holy	launch	Not Dependent	yes, advice by doctor	safe	sufficient	moderate interested	immediately stop	easy	good to health	good intension	agree	strong disagree	disagree	disagree	agree	agree	agree	Bad Perception
Bati	36-50	male	married	good	over weight	secondary school	3 meal	yes, sometimes	intentional	yes, som	chili pep	other	my habit	heated	beef	keeps me	nothing	few time day	launch	Not Dependent	no	neutral	sufficient	moderate interested	immediately stop	easy	good to health	good intension	agree	disagree	strong disagree	disagree	agree	neutral	agree	Bad Perception
Bati	18-35	male	single	good	normal weight	secondary school	3 meal	yes, always	peer pres	yes, som	mixture	other	no reason	raw beef	beef	cheers me	nothing	once a week	breakfast	Not Dependent	yes, my personal decision	I don't know	good	not interested	may be	easy	I didn't believe	good intension	agree	disagree	strong disagree	disagree	agree	neutral	agree	Bad Perception
Bati	36-50	male	married	good	normal weight	secondary school	3 meal	yes, always	peer pres	yes, most	chili pep	alcohol	incr meta	raw beef	beef	cheers me	nothing	once a day	launch	Not Dependent	no	unsafe	sufficient	in dilemma	may be	easy	good to health	good intension	agree	disagree	disagree	neutral	agree	neutral	disagree	Bad Perception
Bati	36-50	male	widow	excellent	over weight	higher education	3 meal	no	intentional	yes, most	chili pep	other	good feel	raw beef	mutton	cheers me	hunger	once a week	launch	Not Dependent	no	safe	insufficient	highly interested	never	not easy	addicted	good intension	disagree	disagree	disagree	agree	strong agree	neutral	neutral	Bad Perception
Wereilu	36-50	male	single	excellent	normal weight	higher education	3 meal	no	peer pres	yes, most	mixture	alcohol	incr meta	raw beef	mutton	cheers me	uncomfor	1-3t month	all meals	Not Dependent	no	unsafe	sufficient	not interested	never	impossible	addicted	good intension	disagree	disagree	disagree	agree	agree	neutral	neutral	Bad Perception
Wereilu	>50	male	married	good	normal weight	secondary school	3 meal	yes, always	habit fr an	yes, most	mixture	other	my habit	heated	beef	my traditi	nothing	only holy	launch	Not Dependent	yes, advice by doctor	unsafe	good	moderate interested	immediately stop	easy	good to health	good intension	strong agree	agree	disagree	disagree	agree	agree	agree	Good Perception
Wereilu	18-35	female	married	good	normal weight	higher education	2 meal	yes, sometimes	habit fr an	yes, som	chili pep	other	my habit	heated	beef	high nutr	nothing	few time we	launch	Not Dependent	yes, my personal decision	I don't know	sufficient	not interested	may be	easy	good to health	good intension	agree	disagree	neutral	disagree	agree	agree	agree	Bad Perception
Wereilu	18-35	male	single	excellent	obese	secondary school	3 meal	no	peer pres	yes, most	chili pep	alcohol	no reason	raw beef	beef	cheers me	hunger	1-3t month	launch	Not Dependent	no	unsafe	insufficient	in dilemma	need time	unsure	no alternative	good intension	agree	disagree	neutral	disagree	agree	neutral	neutral	Bad Perception
Wereilu	36-50	male	married	very good	over weight	higher education	3 meal	yes, sometimes	I don't re	yes, som	pepper	tea & coff	my habit	heated	beef	high nutr	nothing	few time we	breakfast	Not Dependent	yes, my personal decision	I don't know	good	strongly not interested	may be	easy	good to health	good intension	agree	disagree	neutral	disagree	agree	neutral	agree	Bad Perception
Wereilu	36-50	female	married	very good	normal weight	secondary school	3 meal	yes, sometimes	I don't re	yes, most	chili pep	other	good feel	heated	beef	cheers me	nothing	once a day	launch	Not Dependent	yes, my personal decision	unsafe	good	in dilemma	need time	unsure	I didn't believe	good intension	agree	disagree	neutral	neutral	agree	agree	agree	Bad Perception
Wereilu	>50	male	married	good	normal weight	secondary school	3 meal	yes, always	habit fr an	yes, most	chili pep	other	my habit	heated	beef	my traditi	nothing	only holy	launch	Not Dependent	no	neutral	sufficient	highly interested	immediately stop	very easy	good to health	good intension	agree	disagree	disagree	disagree	agree	neutral	neutral	Bad Perception
Wereilu	>50	male	married	good	normal weight	higher education	3 meal	yes, sometimes	habit fr an	yes, som	mixture	alcohol	incr meta	heated	beef	my traditi	nothing	only holy	launch	Not Dependent	yes, advice by doctor	safe	sufficient	moderate interested	immediately stop	easy	good to health	good intension	agree	agree	disagree	disagree	agree	agree	agree	Good Perception
Wereilu	36-50	male	married	good	normal weight	higher education	3 meal	yes, sometimes	intentional	yes, most	chili pep	tea & coff	incr meta	heated	beef	cheers me	nothing	few time we	launch	Not Dependent	no	neutral	good	moderate interested	may be	easy	good to health	good intension	agree	disagree	disagree	disagree	agree	agree	agree	Bad Perception
Wereilu	18-35	male	single	good	normal weight	secondary school	3 meal	yes, sometimes	habit fr an	yes, most	chili pep	other	no reason	heated	beef	high nutr	nothing	few time we	launch	Not Dependent	yes, my personal decision	I don't know	good	not interested	need time	unsure	good to health	good intension	agree	disagree	disagree	disagree	agree	neutral	agree	Bad Perception
Wereilu	36-50	female	married	good	normal weight	higher education	3 meal	yes, sometimes	I don't re	yes, som	chili pep	alcohol	my habit	heated	beef	easy to prepare	nothing	once a day	launch	Not Dependent	yes, my personal decision	unsafe	sufficient	in dilemma	may be	easy	good to health	good intension	agree	disagree	disagree	disagree	agree	agree	agree	Bad Perception
Wereilu	36-50	male	widow	very good	obese	secondary school	2 meal	yes, sometimes	peer pres	yes, most	mixture	alcohol	incr meta	raw beef	mutton	cheers me	uncomfor	once a week	all meals	Not Dependent	no	neutral	sufficient	in dilemma	never	impossible	addicted	bad intension	disagree	disagree	disagree	agree	strong agree	agree	neutral	Bad Perception
Wereilu	>50	male	married	good	normal weight	higher education	3 meal	yes, always	habit fr an	yes, most	mixture	other	good feel	heated	beef	my traditi	nothing	only holy	launch	Not Dependent	yes, advice by doctor	neutral	sufficient	moderate interested	immediately stop	very easy	good to health	good intension	agree	neutral	disagree	disagree	agree	agree	agree	Good Perception
Wereilu	36-50	female	married	very good	normal weight	secondary school	3 meal	yes, sometimes	I don't re	yes, som	pepper	other	good feel	heated	beef	easy to prepare	nothing	few time we	launch	Not Dependent	yes, my personal decision	I don't know	very good	not interested	may be	easy	good to health	good intension	agree	disagree	disagree	disagree	agree	neutral	neutral	Bad Perception
Wereilu	18-35	male	married	excellent	obese	secondary school	3 meal	no	peer pres	yes, most	mixture	alcohol	incr meta	raw beef	beef	keeps me	hunger	1-3t month	launch	Not Dependent	no	safe	sufficient	not interested	never	not easy	addicted	bad intension	disagree	disagree	disagree	agree	strong agree	agree	neutral	Bad Perception
Wereilu	36-50	male	widow	very good	over weight	secondary school	3 meal	no	peer pres	yes, most	mixture	alcohol	incr meta	raw beef	beef	cheers me	uncomfor	1-3t month	all meals	Dependent	no	neutral	sufficient	strongly not interested	never	impossible	addicted	bad intension	disagree	disagree	strong disagree	agree	agree	neutral	neutral	Bad Perception
Wereilu	36-50	male	married	good	normal weight	secondary school	2 meal	yes, sometimes	intentional	yes, most	mixture	other	good feel	heated	beef	my traditi	nothing	once a day	launch	Not Dependent	yes, my personal decision	I don't know	good	not interested	may be	easy	no alternative	good intension	agree	disagree	neutral	neutral	agree	agree	agree	Bad Perception
Wereilu	36-50	male	married	good	normal weight	secondary school	3 meal	yes, sometimes	intentional	yes, som	chili pep	other	my habit	heated	beef	keeps me	nothing	few time we	launch	Not Dependent	yes, my personal decision	unsafe	insufficient	in dilemma	may be	easy	good to health	good intension	agree	disagree	disagree	disagree	agree	agree	agree	Bad Perception
Wereilu	18-35	female	married	good	normal weight	secondary school	3 meal	yes, sometimes	I don't re	yes, most	chili pep	other	my habit	heated	beef	keeps me	nothing	once a day	launch	Not Dependent	no	unsafe	sufficient	not interested	need time	unsure	good to health	good intension	agree	disagree	disagree	disagree	agree	neutral	neutral	Bad Perception
Wereilu	>50	male	married	good	normal weight	secondary school	3 meal	yes, sometimes	habit fr an	yes, most	chili pep	alcohol	incr meta	heated	beef	my traditi	nothing	only holy	launch	Not Dependent	yes, advice by doctor	I don't know	good	moderate interested	immediately stop	easy	good to health	good intension	agree	neutral	disagree	disagree	agree	neutral	neutral	Good Perception
Wereilu	>50	male	married	good	normal weight	higher education	3 meal	yes, always	habit fr an	yes, som	mixture	alcohol	good feel	heated	beef	my traditi	nothing	only holy	launch	Not Dependent	yes, advice by doctor	safe	sufficient	moderate interested	immediately stop	very easy	good to health	good intension	agree	neutral	disagree	disagree	agree	agree	agree	Good Perception
Wereilu	36-50	male	married	very good	over weight	secondary school	3 meal	no	I don't re	yes, most	mixture	tea & coff	good feel	raw beef	beef	cheers me	nothing	few time day	breakfast	Not Dependent	no	neutral	good	strongly not interested	may be	easy	I didn't believe	good intension	agree	disagree	neutral	disagree	agree	neutral	agree	Bad Perception
Wereilu	36-50	female	married	good	normal weight	higher education	2 meal	yes, sometimes	habit fr an	yes, som	pepper	other	my habit	heated	beef	easy to prepare	nothing	few time we	launch	Not Dependent	yes, my personal decision	unsafe	insufficient	not interested	immediately stop	easy	good to health	good intension	agree	disagree	disagree	disagree	agree	agree	agree	Bad Perception
Wereilu	18-35	male	single	good	normal weight	secondary school	3 meal	yes, sometimes	I don't re	yes, most	mixture	other	my habit	heated	beef	cheers me	nothing	once a day	launch	Not Dependent	yes, my personal decision	neutral	sufficient	moderate interested	may be	easy	no alternative	good intension	agree	disagree	neutral	disagree	agree	agree	agree	Bad Perception
Wereilu	>50	male	married	good	normal weight	higher education	3 meal	yes, sometimes	habit fr an	yes, most	mixture	tea & coff	good feel	heated	beef	my traditi	nothing	once a day	launch	Not Dependent	no	unsafe	sufficient	moderate interested	immediately stop	easy	good to health	good intension	agree	agree	disagree	disagree	agree	neutral	agree	Good Perception
Wereilu	18-35	male	single	excellent	obese	secondary school	3 meal	no	habit fr an	yes, most	mixture	tea & coff	my habit	heated	beef	cheers me	nothing	few time we	launch	Not Dependent	yes, my personal decision	I don't know	good	in dilemma	may be	easy	good to health	good intension	agree	disagree	disagree	disagree	agree	agree	agree	Bad Perception
Wereilu	18-35	male	married	good	over weight	secondary school	3 meal	yes, sometimes	intentional	yes, som	chili pep	other	no reason	heated	beef	cheers me	nothing	once a day	launch	Not Dependent	yes, my personal decision	unsafe	good	not interested	immediately stop	easy	good to health	good intension	agree	disagree	disagree	disagree	agree	agree	agree	Bad Perception
Wereilu	36-50	male	married	good	normal weight	higher education	3 meal	yes, sometimes	I don't re	yes, most	mixture	tea & coff	my habit	heated	beef	keeps me	nothing	once a day	launch	Not Dependent	no	neutral	sufficient	moderate interested	may be	easy	good to health	good intension	agree	disagree	disagree	disagree	agree	neutral	agree	Bad Perception
Wereilu	18-35	male	single	poor	under weight	secondary school	3 meal	no	peer pres	yes, most	mixture	alcohol	incr meta	raw beef	beef	cheers me	hunger	once a day	launch	Not Dependent	no	neutral	good	in dilemma	need time	unsure	I didn't believe	bad intension	agree	disagree	disagree	disagree	agree	agree	agree	Bad Perception
Wereilu	>50	male	married	good	normal weight	secondary school	3 meal	yes, always	habit fr an	yes, som	chili pep	other	no reason	heated	beef	my traditi	nothing	once a week	launch	Not Dependent	yes, advice by doctor	safe	sufficient	moderate interested	immediately stop	easy	good to health	good intension	agree	neutral	disagree	disagree	agree	agree	agree	Good Perception
Wereilu	36-50	male	widow	excellent	normal weight	higher education	3 meal	no	peer pres	yes, most	mixture	alcohol	incr meta	raw beef	beef	cheers me	uncomfor	1-3t month	all meals	Dependent	no	safe	sufficient	not interested	never	impossible	addicted	bad intension	agree	disagree	neutral	disagree	agree	agree	agree	Bad Perception
Wereilu	36-50	female	married	very good	normal weight	higher education	3 meal	yes, always	I don't re	yes, som	pepper	other	no reason	heated	mutton	easy to prepare	nothing	once a day	launch	Not Dependent	yes, my personal decision	unsafe	sufficient	moderate interested	may be	easy	good to health	good intension	agree	disagree	disagree	disagree	agree	neutral	agree	Bad Perception
Wereilu	36-50	male	married	very good	over weight	secondary school	3 meal	yes, sometimes	I don't re	yes, most	mixture	tea & coff	my habit	heated	beef	my traditi	nothing	few time we	breakfast	Not Dependent	yes, my personal decision	neutral	sufficient	in dilemma	may be	easy	good to health	good intension	agree	disagree	neutral	disagree	agree	agree	agree	Bad Perception
Wereilu	18-35	male	single	very good	normal weight	higher education	4 meal	no	intentional	yes, som	mixture	alcohol	my habit	heated	mutton	high nutr	nothing	once a day	launch	Not Dependent	no	I don't know	good	strongly not interested	need time	unsure	I didn't believe	bad intension	agree	disagree	disagree	disagree	agree	neutral	neutral	Bad Perception
Wereilu	18-35	female	married	good	normal weight	secondary school	3 meal	yes, always	I don't re	yes, most	mixture	tea & coff	good feel	heated	beef	easy to prepare	nothing	few time day	launch	Not Dependent	yes, my personal decision	neutral	good	not interested	may be	easy	good to health	good intension	agree	disagree	disagree	disagree	agree	neutral	agree	Bad Perception
Wereilu	36-50	male	married	good	normal weight	higher education	3 meal	yes, always	I don't re	yes, som	chili pep	tea & coff	my habit	heated	beef	keeps me	nothing	few time we	launch	Not Dependent	no	neutral	good	not interested	need time	unsure	good to health	bad intension	agree	disagree	strong disagree	strong disagree	agree	neutral	neutral	Bad Perception
Wereilu	18-35	male	married	very good	over weight	higher education	3 meal	no	peer pres	yes, most	chili pep	alcohol	incr meta	raw beef	beef	my traditi	nothing	1-3t month	launch	Not Dependent	no	neutral	sufficient	in dilemma	need time	unsure	I didn't believe	bad intension	agree	disagree	disagree	disagree	agree	agree	agree	Bad Perception
Wereilu	36-50	male	married	good	normal weight	higher education	3 meal	yes, sometimes	I don't re	yes, most	mixture	tea & coff	good feel	heated	beef	cheers me	nothing	few time we	launch	Not Dependent	yes, my personal decision	unsafe	sufficient	moderate interested	may be	easy	good to health	good intension	agree	disagree	disagree	disagree	agree	neutral	neutral	Bad Perception
Wereilu	18-35	male	single	excellent	obese	secondary school	3 meal	yes, always	peer pres	yes, most	mixture	alcohol	incr meta	heated	beef	my traditi	nothing	once a day	launch	Not Dependent	yes, my personal decision	unsafe	sufficient	not interested	need time	unsure	good to health	good intension	agree	disagree	disagree	disagree	agree	agree	agree	Bad Perception
Wereilu	18-35	male	single	very good	over weight	higher education	3 meal	no	I don't re	yes, most	mixture	tea & coff	incr meta	heated	beef	cheers me	nothing	once a day	launch	Not Dependent	no	unsafe	sufficient	not interested	may be	easy	good to health	good intension	agree	disagree	strong disagree	disagree	agree	agree	agree	Bad Perception
Wereilu	36-50	male	married	good	normal weight	secondary school	3 meal	yes, sometimes	peer pres	yes, most	chili pep	tea & coff	my habit	raw beef	beef	cheers me	nothing	few time we	launch	Not Dependent	yes, my personal decision	unsafe	sufficient	not interested	immediately stop	easy	good to health	good intension	agree	disagree	strong disagree	strong disagree	agree	neutral	neutral	Bad Perception
Wereilu	36-50	female	married	good	normal weight	higher education	2 meal	yes, sometimes	intentional	yes, most	chili pep	tea & coff	good feel	heated	mutton	keeps me	nothing	few time we	launch	Not Dependent	no	I don't know	good	moderate interested	may be	easy	good to health	good intension	agree	disagree	disagree	disagree	strong agree	agree	agree	Bad Perception
Wereilu	36-50	female	married	very good	normal weight	higher education	3 meal	yes, sometimes	peer pres	yes, most	chili pep	other	my habit	heated	beef	my traditi	nothing	few time day	breakfast	Not Dependent	yes, my personal decision	unsafe	good	not interested	immediately stop	easy	good to health	good intension	agree	disagree	strong disagree	disagree	agree	agree	agree	Bad Perception
Wereilu	36-50	male	married	good	normal weight	secondary school	3 meal	yes, always	intentional	yes, som	chili pep	tea & coff	good feel	heated	beef	my traditi	nothing	few time we	launch	Not Dependent	yes, my personal decision	neutral	sufficient	in dilemma	may be	easy	good to health	good intension	agree	disagree	disagree	disagree	agree	neutral	agree	Bad Perception
Wereilu	36-50	male	single	good	normal weight	higher education	2 meal	yes, sometimes	intentional	yes, most	chili pep	alcohol	incr meta	raw beef	beef	high nutr	hunger	once a week	breakfast	Not Dependent	no	safe	good	not interested	never	not easy	addicted	bad intension	disagree	disagree	neutral	agree	agree	neutral	neutral	Bad Perception
Wereilu	18-35	male	single	good	over weight	secondary school	2 meal	no	habit fr an	yes, som	pepper	other	no reason	raw beef	beef	keeps me	nothing	once a day	dinner	Not Dependent	yes, my personal decision	unsafe	good	not interested	need time	unsure	I didn't believe	good intension	agree	disagree	strong disagree	disagree	agree	agree	agree	Bad Perception
Wereilu	18-35	male	single	very good	over weight	secondary school	3 meal	yes, sometimes	I don't re	yes, most	chili pep	alcohol	incr meta	heated	beef	cheers me	nothing	once a day	launch	Not Dependent	yes, my personal decision	neutral	good	not interested	may be	easy	good to health	good intension	agree	disagree	disagree	disagree	agree	agree	agree	Bad Perception
Wereilu	36-50	male	widow	very good	over weight	secondary school	3 meal	yes, sometimes	peer pres	yes, most	mixture	alcohol	incr meta	raw beef	beef	cheers me	uncomfor	1-3t month	all meals	Not Dependent	no	unsafe	sufficient	not interested	never	impossible	addicted	good intension	disagree	disagree	strong disagree	agree	agree	neutral	neutral	Bad Perception
Wereilu	36-50	male	married	very good	over weight	secondary school	3 meal	no	I don't re	yes, most	chili pep	tea & coff	my habit	heated	beef	cheers me	nothing	once a day	launch	Not Dependent	no	safe	insufficient	moderate interested	immediately stop	easy	good to health	good intension	agree	disagree	strong disagree	strong disagree	agree	neutral	agree	Bad Perception
Wereilu	18-35	male	single	good	normal weight	secondary school	3 meal	yes, sometimes	I don't re	yes, most	mixture	other	my habit	heated	beef	keeps me	nothing	few time we	launch	Not Dependent	yes, my personal decision	I don't know	good	not interested	need time	unsure	no alternative	good intension	agree	disagree	disagree	disagree	strong agree	agree	agree	Bad Perception

## Sheet: Description of Variables
Short names in the dataset	Full questions
Meal Daily	How many meals do you usually consume daily?
Meal Regularity	Do you consume meals at regular time?
How Start RB	How did you started eating raw beef?
Add Spice	Do you add spices on the raw beef before you consume?
Spice Type	What type of spice do you add on the raw beef before you consume?
What Do After Eat RB	What did you do after you consume raw beef?
Reason to V	What is your reason for the post raw beef eating actions you mentioned in the previous question?
Favorite Preparation	What is your preferred preparation type?
Raw Beef Type	What type of raw meat do you usually consume?
Reason Eating RB	What is your reason to eat raw beef?
Prefered RB	What type of meat do you usually prefer to eat?
feeling	What did you feel if you didn’t eat raw beef?
How Often Eating RB	How often do you eat raw beef?
Which Meal Eat RB	In which of your meal do you prefer to eat raw beef?
Addiction Level	The dependent binary variables produced from the dependency related questions
Intent to stop RB	Are you currently intend to reduce/stop eating raw beef?
Beliefe RB Safety	How do you believe about the safety of raw beef consumption?
K.RB Health Risk	How would you describe your knowledge about the health risk of raw beef consumption?
Intent to Improve RBE.K	Are you intend to improve your knowledge on the health risk of raw beef consumption?
Improve RBE.K Health Risk	Will you stop /reduce eating raw beef if you know its health impact?
How Easy to stop RBE	How easy is to change your raw beef eating habit?
What Prevents to stop RBE	What prevents you to stop eating raw beef?
cumulative intension	The dependent binary variables produced from the intention related questions
RBE Expose Diseases	Eating raw beef can exposed the consumers to diseases.
RBE Disease Fatal	The disease that originated from raw beef can be fatal to consumers.
RBE Benefit > Risk	The benefits of consuming raw beef are greater than the health risks.
Spice and Alchol Kill Germs	The spices added on the raw beef and the alcohol drunken after raw beef consumption can kill the pathogens.
Cooking Avoid Germs	Cooking and/or cooling of meat before consumption have an effect on the beef-borne pathogens.
RB contaminate by Germs	The meat can be contaminated with dangerous pathogens along its value chain.
RB Transmit Disease	The diseases from animals, persons and the environment can transmit to human through raw beef consumption.
Cummulative Perception	The dependent binary variables produced from the perception related questions
